1 **Identifications of novel avian and mammalian deltaviruses filled the large**  
2 **evolutionally gaps and revealed inter-family transmission of deltaviruses**

3

4 Masashi Iwamoto<sup>1,2</sup>, Yukino Shibata<sup>3</sup>, Junna Kawasaki<sup>4,5</sup>, Shohei Kojima<sup>4,6</sup>, Yung-  
5 Tsung Li<sup>7</sup>, Shingo Iwami<sup>2</sup>, Hui-Lin Wu<sup>7,8</sup>, Kazuhiro Wada<sup>3</sup>, Keizo Tomonaga<sup>4,5,9</sup>,  
6 Koichi Watashi<sup>1,10</sup>, Masayuki Horie<sup>4,11,\*</sup>

7

8 <sup>1</sup>*Department of Virology II, National Institute of Infectious Diseases, Tokyo, Japan*

9 <sup>2</sup>*Mathematical Biology Laboratory, Department of Biology, Faculty of Sciences, Kyushu University,*  
10 *Fukuoka, Japan*

11 <sup>3</sup>*Graduate School of Life Science, Hokkaido University, Sapporo, Hokkaido, Japan*

12 <sup>4</sup>*Institute for Frontier Life and Medical Science, Kyoto University, Kyoto, Japan*

13 <sup>5</sup>*Department of Mammalian Regulatory Network, Graduate School of Biostudies, Kyoto University,*  
14 *Kyoto, Japan*

15 <sup>6</sup>*Genome Immunobiology RIKEN Hakubi Research Team, RIKEN Cluster for Pioneering Research*

16 <sup>7</sup>*Hepatitis Research Center, National Taiwan University Hospital, Taipei, Taiwan*

17 <sup>8</sup>*Graduate Institute of Clinical Medicine, National Taiwan University College of Medicine*

18 <sup>9</sup>*Department of Molecular Virology, Graduate School of Medicine, Kyoto University, Kyoto, Japan*

19 <sup>10</sup>*Department of Applied Biological Sciences, Tokyo University of Science, Noda, Japan*

20 <sup>11</sup>*Hakubi Center for Advanced Research, Kyoto University*

21

22 \*Corresponding author

23 Masayuki Horie, DVM, PhD

24 Hakubi Center for Advanced Research, Kyoto University

25 53 Kawahara-cho, Shogo-in, Sakyo, Kyoto 606-8507, Japan

26 Email: horie.masayuki.3m@kyoto-u.ac.jp

27 **Abstract**

28 Deltaviruses are unique satellite viruses requiring envelope protein from helper viruses  
29 to form infectious particles. Although human hepatitis delta virus (HDV), a satellite  
30 virus of a hepadnavirus, has been the only member of the genus *Deltavirus* until 2018,  
31 recent studies identified several deltaviruses in vertebrate and invertebrate animals.  
32 However, the evolution of deltaviruses, such as the origin of HDV and co-evolution  
33 with helper viruses, is still unclear due to the large phylogenetic gaps between the  
34 deltaviruses. In this study, by a combination of screening of publicly available RNA-seq  
35 datasets and RT-PCR, we identified five full-length, circular genomes of deltaviruses  
36 from passerine birds, woodchucks, and white-tailed deer. By mapping public RNA-seq  
37 data to the newly identified deltaviruses and RT-PCR, we found that the passerine  
38 deltaviruses have been circulating among the animal populations, including a bird  
39 caught from wild. Interestingly, the passerine deltaviruses show more than 98%  
40 nucleotide identities to each other and were detected from birds spanning at least four  
41 families in the order Passeriformes, suggesting the recent inter-family transmission  
42 events and the potential of broad host ranges of deltaviruses. Phylogenetic analyses  
43 showed that the newly identified deltaviruses are relatively closely related to known  
44 vertebrate deltaviruses and that newly identified mammalian deltaviruses are the closest  
45 relatives of HDV, suggesting the mammalian origin of HDV. Interestingly, there is no  
46 evidence that these mammalian deltaviruses express the large isoform of delta antigen  
47 that contains a farnesylation site required for HDV to utilize hepadnavirus envelope  
48 proteins. Also, there is no evidence of hepadnavirus infections in deltavirus-positive  
49 individuals. Therefore, the satellite-helper relationship between HDV and hepadnavirus  
50 may have been established relatively recently, after the divergence of the newly

51 identified non-HDV mammalian deltaviruses and the HDV lineage. Taken together, our  
52 findings provide novel insights into the evolution and diversity of deltaviruses and raise  
53 the importance of further surveillance for deltaviruses in a wide range of animals.

## 54 **Introduction**

55 Hepatitis delta virus (HDV), which belongs to the genus *Deltavirus*, has an  
56 approximately 1.7-kb circular, negative single-stranded RNA as the virus genome (1, 2).  
57 The genome has a single open reading frame (ORF) encoding two viral proteins called  
58 small and large hepatitis delta antigens (S- and L-HDAg, approximately 24 and 27 kDa,  
59 respectively), which expressed from the same transcription unit via RNA-editing in the  
60 stop codon by a host protein, ADAR1 (3-5). The 19-aa extended C-terminal region of L-  
61 HDAg protein contains a farnesylation site, which is necessary to interact with envelope  
62 proteins from helper viruses (6). The genome structure of HDV is unique in that the  
63 genome and antigenome have ribozymes, which are essential for the replication of HDV  
64 (7, 8), and show high self-complementarity, resulting in the formation of rod-like shape  
65 genome (9-11). Although HDV can alone replicate in the host cells, it needs envelope  
66 protein from other “helper” viruses to produce infectious virions. Hepatitis B virus  
67 (HBV), which belongs to the family *Hepadnaviridae*, is a well-known helper virus to  
68 provide the envelope protein for HDV transmission in human patients (12). Globally,  
69 more than 15-20 million people are estimated to be infected by HDV among 350  
70 million people of HBV carriers (14). Coinfection of HDV and HBV accelerate HBV  
71 related pathogenesis: severe or fulminant hepatitis and progression to hepatocellular  
72 carcinoma than HBV infection alone, although the mechanism of pathogenesis induced  
73 by HDV infection has not been fully understood (15).

74 Since HDV has been the sole member of the genus *Deltavirus* (2), its evolutionary  
75 origin had been enigmatic. However, recent studies discovered several deltaviruses from  
76 vertebrates and invertebrate species (16-19), which drastically changed our  
77 understanding of the evolution of deltaviruses. These non-HDV deltaviruses are

78 distantly related to HDV, but apparently share the same origin because they have similar  
79 genome structures: their genomes are circular RNA approximately 1.7 kb, encode DA<sub>g</sub>-  
80 like proteins, possess ribozymes sequences, and show high self-complementarities (16-  
81 19). These findings would be clues to understanding the origin and evolution of  
82 deltaviruses. Indeed, previous studies proposed several interesting hypotheses: for  
83 example, a recent study proposed a hypothesis that mammalian deltaviruses have been  
84 co-diverged with mammalian species (19). Thus far, however, only a handful of  
85 deltaviruses were found, but they are genetically highly diverse (16-19). Therefore, to  
86 assess the hypothesis as well as for a deeper understanding of the evolution of  
87 deltaviruses, the phylogenetic gaps between the deltaviruses are needed to be filled by  
88 exploring novel deltaviruses.

89       The discoveries of non-HDV deltaviruses have also provided insights into the  
90 relationships between deltaviruses and their helper viruses. Recently identified non-  
91 HDV deltaviruses apparently did not co-infect with hepadnaviruses, suggesting the  
92 presence of other helper viruses (16-19). This is also supported by the lack of large  
93 isoform of DA<sub>g</sub> protein expression, which is mediated by RNA-editing and is necessary  
94 for HDV to interact with the hepadnaviral envelope protein as described above, in  
95 rodent deltavirus (19). Also, a recent study showed viral envelope proteins from  
96 reptarenavirus and hartmanivirus, but not HBV, could render infectivity to snake  
97 deltavirus (20). These findings suggest that hepadnaviruses are not helper viruses for  
98 non-HDV deltaviruses and that the deltavirus-hepadnavirus relationship has been  
99 established only in the HDV lineage. However, the large phylogenetic gap between  
100 HDV and a handful of other deltaviruses makes it difficult to assess the hypothesis.  
101 Therefore, these observations again raise the importance of exploring deltaviruses and

102 of experimental investigation for those viruses.

103       In this study, to understand the evolution of deltaviruses, we explored publicly  
104 available transcriptome data from mammals and birds and found novel mammalian and  
105 avian deltaviruses. Our phylogenetic analysis suggests that HDVs are apparently  
106 originated from non-human mammalian deltaviruses and does not support a co-  
107 diversification hypothesis of deltaviruses and mammals. Interestingly, our analyses,  
108 together with previous findings, suggest that the satellite-helper relationship between  
109 HDV and hepadnavirus may have been established relatively recently, after the  
110 divergence of the newly identified non-HDV mammalian deltaviruses and the HDV  
111 lineage. Furthermore, we showed evidence of the circulation of the newly identified  
112 deltaviruses among animal populations as well as the recent inter-family transmission in  
113 birds. Our findings provide novel insights into the evolution as well as virological  
114 features of deltaviruses.  
115

## 116 **Materials and methods**

### 117 *Detection of deltaviruses from publicly available transcriptome data*

118 Paired-end, RNA-seq data from birds and mammals were downloaded from NCBI SRA  
119 (21). The SRA accession number used in this study are listed in Supplementary  
120 material. The downloaded SRA files were dumped using pfastq-dump (DOI:  
121 10.5281/zenodo.2590842; <https://github.com/inutano/pfastq-dump>), and then  
122 preprocessed by fastp 0.20.0 (22). If genome data of the same species or genus is  
123 available, the preprocessed reads were mapped to the corresponding genome sequences  
124 by HISAT2 2.1.0 (23), and then unmapped paired-end reads were extracted using  
125 SAMtools 1.9 (24) and Picard 2.20.4 (<http://broadinstitute.github.io/picard/>). The  
126 extracted unmapped reads were used for *de novo* assembly. If genome data is  
127 unavailable, the preprocessed reads were directly used for *de novo* assembly. *De novo*  
128 assembly was performed using SPAdes (25) and/or metaSPAdes (26) 3.13.0 with k-mer  
129 of 21, 33, 55, 77, and 99. The resultant contigs were clustered by cd-hit-est 4.8.1 (27,  
130 28) with a threshold of 0.95. Finally, the clustered contigs equal to or more than 500 nt  
131 were extracted by SeqKit 0.9.0 (29), which were used for the downstream analyses.

132 Two-step sequence similarity searches were performed to identify RNA virus-like  
133 sequences. First, BLASTx searches were performed against a custom database for RNA  
134 viruses using the obtained contigs as queries using BLAST+ 2.9.0 (30) with the  
135 following options: -word\_size 2, -evalue 1e-3, max\_target\_seqs 1. The custom database  
136 of RNA viruses was made by clustered sequences (by cd-hit 4.8.1 with a threshold of  
137 0.98) from viruses belonging to the realm *Riboviria* in the NCBI GenBank (the  
138 sequences were downloaded on June 2, 2019) (21). The query sequences with viral hits  
139 were then subjected to the second BLASTx analyses. The second BLASTx was carried

140 out against the NCBI nr database. Finally, the second blast hits with the best hit against  
141 deltaviruses were regarded as deltavirus-like agents, which were used for detailed  
142 analyses.

143

#### 144 *Confirmation of circularities of deltavirus contigs*

145 Self dot-plot analyses of linear deltavirus contigs were performed in the YASS online  
146 web server (31). Based on the analysis, the contigs were manually circularized using  
147 Geneious 11.1.5 (<https://www.geneious.com>). To further confirm circularities of  
148 deltavirus contigs, short reads were mapped to circular deltavirus contigs using  
149 Geneious software. The reads used for the *de novo* assembly were imported to  
150 Geneious, and then mapped to the circular contigs by the Geneious mapper. The  
151 mapped reads across the circularized boundaries were manually confirmed.

152

#### 153 *Detection of possible RNA-editing sites at stop codons of DAg genes*

154 To detect possible RNA-editing at the stop codons of DAg genes of deltaivruses, the  
155 mapped reads obtained in the above analyses were used. By the “Find Variation/SNPs”  
156 function in Geneious, we analyzed the nucleotide variations (presence of variations,  
157 variant nucleotide(s), and variant frequency) of mapped reads at each of the stop codons  
158 of newly identified deltaviruses. The quality scores of the variant nucleotides were  
159 analyzed manually in Geneious.

160

#### 161 *Sequence characterization*

162 DAg ORFs was detected by the “Find ORFs” finction in Geneious with a threshold of  
163 500 nucleotides. Poly(A) signals were manually detected. Putative ribozyme sequences



164 were identified by nucleotide sequence alignment with other deltaviruses. Ribozyme  
165 structures were first inferred by TT2NE webserver (32), and then the obtained data were  
166 visualized by PsudoViewer3 web server (33). The visualized data were used as guides  
167 to draw ribozyme structures.

168 The self-complementarities of deltavirus-like contigs were analyzed by Mfold web  
169 server (34). Coiled-coil domains and nuclear export signals (NLSs) were predicted  
170 using DeepCoil (35) and NLSmapper ([http://nls-mapper.iab.keio.ac.jp/cgi-](http://nls-mapper.iab.keio.ac.jp/cgi-bin/NLS_Mapper_form.cgi)  
171 [bin/NLS\\_Mapper\\_form.cgi](http://nls-mapper.iab.keio.ac.jp/cgi-bin/NLS_Mapper_form.cgi)) web servers, respectively.

172

### 173 *Short read mapping for detection of deltavirus infection*

174 To detect deltavirus-derived reads in publicly available RNA-seq data, short reads were  
175 mapped to deltavirus genomes and then counted the numbers of mapped reads as  
176 follows. SRA files were downloaded from NCBI, dumped, and preprocessed as  
177 described above. The preprocessed reads were then mapped to linearized deltavirus  
178 contigs by HISAT2 with the default setting. The mapped bam files were extracted from  
179 the resultant bam files by SAMtools, and the mapped read numbers were counted by  
180 BamTools 2.5.1 (36).

181

### 182 *Recovery of a deltavirus genome from RNA-seq data of *Pardaliparus venustulus**

183 Mapped reads obtained from SRR7244693, SRR7244695, SRR7244696, SRR7244697,  
184 and SRR7244698 in the above analysis (section *Short read mapping for detection of*  
185 *deltavirus infection*) were extracted by Geneious. All the extracted reads were co-  
186 assembled using Geneious Assembler with the circular contig assembly function. The  
187 obtained circular contigs were characterized as described above.

188

189 *Animals and samples*

190 Zebra finch males (n = 15) and females (n = 15) were obtained from breeding colonies  
191 at Wada lab, Hokkaido University. The founder birds were originally obtained from  
192 local breeders in Japan. Five to twelve birds were kept together in cages in an aviary on  
193 a 13:11 light-dark cycle. Blood samples were collected from the wing vein using 30G ×  
194 8 mm syringe needles (Becton Dickinson). Each of the blood samples was diluted 1.5  
195 times with PBS, immediately frozen on dry ice after collection, and kept at -80°C until  
196 use. These experiments were conducted under the guidelines and approval of the  
197 Committee on Animal Experiments of Hokkaido University. These guidelines are based  
198 on the national regulations for animal welfare in Japan (Law for the Humane Treatment  
199 and Management of Animals with partial amendment No.105, 2011).

200 Woodchucks (*Marmota monax*) were purchased from Northeastern Wildlife  
201 (Harrison, ID, USA), and maintained at the Laboratory Animal Center, National Taiwan  
202 University College of Medicine. Captive-born woodchucks were infected with  
203 woodchuck hepatitis virus (WHV) at three days of age with the same infectious pool by  
204 the animal supplier. Wild-caught woodchucks were infected naturally and live trapped.  
205 Serum samples from the woodchucks were collected periodically from the femoral vein  
206 using the venipuncture method. Liver tissues of woodchucks were obtained at autopsy,  
207 snap-frozen in liquid nitrogen, and stored at -80°C until RNA extraction. Liver tissues  
208 from 10 wild-caught and 33 captive-born woodchucks and serum samples from 33 wild-  
209 caught and five captive-born woodchucks were used in this study. All experimental  
210 procedures involving woodchucks in this study were performed under protocols  
211 approved by the Institutional Animal Care and Use Committee of National Taiwan

212 University College of Medicine.

213

214 *Realtime and Endpoint RT-PCR detection of deltaviruses from animal specimens*

215 Total RNAs were isolated from the whole blood samples from zebra finches and serum  
216 samples from woodchucks using Quick RNA Viral Kit (Zymo Research). The obtained  
217 RNA samples were stored at -80°C until use. Total RNAs were also extracted from 50  
218 mg of the woodchuck liver tissues using Trizol (Invitrogen Life Technologies; CA,  
219 USA) or ToTALLY RNA kit (Ambion; TX, USA) following the instructions of the  
220 manufacturers.

221 The obtained RNA was reverse-transcribed into cDNA using ReverTra Ace qPCR  
222 RT Master Mix (TOYOBO), which were used as templates for real-time PCR analyses.  
223 Real-time PCR was performed with KOD SYBR qPCR Mix (TOYOBO) and primers  
224 (Supp Table 7) using CFX Connect Real-Time PCR Detection System (BIO-RAD)  
225 according to the manufacturer's instruction. pcDNA3-mmDeV(-) and pcDNA3-  
226 rgDeV(-) were used as controls.

227 End-point RT-PCR was also performed to confirm deltavirus infections. PCR was  
228 performed with Phusion Hot Start II DNA Polymerase (Thermo Fisher Scientific) using  
229 the above-described cDNAs and primers listed in Supp Table 7. The PCR products were  
230 analyzed by agarose gel electrophoresis. If needed, the obtained PCR products were  
231 purified and sequenced by Sangar sequencing in FASMAC (Atsugi, Japan).

232

233 *Determination of full genome sequence of deltaviruses*

234 To determine the full genome sequence of detected deltaviruses, the cDNA obtained in  
235 the section "*Realtime and Endpoint RT-PCR detection of deltaviruses from animal*

236 *specimens*” was amplified by illustra GenomiPhi V2 Kit (GE healthcare). The amplified  
237 DNA was then purified with innuPREP PCRpure Kit (Analytik Jena). PCR was  
238 performed with Phusion Hot Start II DNA Polymerase using the primers listed in Supp  
239 Table 7. The PCR products were analyzed by agarose gel electrophoreses. When single  
240 bands were observed, the amplicon was purified with innuPREP PCRpure Kit. When  
241 there were several bands, bands of the expected sizes were extracted and purified using  
242 Zymoclean Gel DNA Recovery Kit (Zymo Research). The purified amplicons were  
243 sequenced in FASMAC (Atsugi, Japan).

244

#### 245 *Phylogenetic analysis*

246 Deduced amino acid sequences of delta antigens were used to infer the phylogenetic  
247 relationship between deltaviruses. Multiple alignment was performed by MAFFT 7.427  
248 using the E-INS-i algorithms (37), and then ambiguously aligned regions were removed  
249 by trimAl 1.2rev59 with the --strict option (38). The phylogenetic relationship was  
250 inferred by the maximum likelihood method using RAxML Next Generation v. 0.9.0  
251 (39). The LG+G model, which showed the lowest BIC by protttest3 3.4.2 (40), was used.  
252 The reliability of the tree was assessed by 1,000 bootstrap resampling using the transfer  
253 bootstrap expectation method (41). The alignment file, as well as the list of accession  
254 numbers, are available in Supporting materials.

255

#### 256 *Detection of co-infected viruses*

257 To identify co-infected viruses in deltavirus-positive SRAs, a three-step BLASTx search  
258 was performed. First, BLASTx searches were performed against a custom database,  
259 including RefSeq protein sequences from viruses using the assembled contigs (see the

260 subsection *Detection of deltaviruses from publicly available transcriptome data*) as  
261 queries. The custom database was made as follows. All virus-derived protein sequences  
262 in the RefSeq protein database (21) were downloaded on July 17, 2020, and were  
263 clustered by cd-hit 4.8.1 (threshold = 0.9). Then, sequences of more than 100 amino  
264 acid residues were extracted by SeqKit 0.10.1, which were used as a BLAST database.  
265 The first BLAST hits were extracted, which were used for the second BLASTx analysis.  
266 The second BLASTx analysis was performed against the NCBI RefSeq protein  
267 database. The BLAST hits with the best hit to viral sequences were extracted and used  
268 for the final BLASTx searches. The final BLASTx searches were performed against the  
269 NCBI nr database. The BLAST hits with the best hit to viral sequences were extracted  
270 and analyzed manually.  
271

272 **Results**

273 ***Identification of deltavirus-like sequences in avian and mammalian transcriptome***  
274 ***data***

275 To explore deltaviruses, we first assembled 46,359 publicly available RNA-seq data  
276 obtained from birds and mammals. Using the resultant contigs as queries, we performed  
277 sequence similarity searches, revealing the presences of five deltavirus-like contigs in  
278 SRA data from birds and mammals: scapulohumeralis caudalis (muscle) of the zebra  
279 finch (*Taeniopygia guttata*), skin of common canary (*Serinus canaria*), skin of Gouldian  
280 finch (*Erythrura gouldiae*), liver of Eastern woodchuck (*Marmota monax*), and pedicle  
281 of white-tailed deer (*Odocoileus virginianus*) (Table 1), which we herein tentatively  
282 named as *Taeniopygia guttata* deltavirus (tgDeV), *Serinus canaria*-associated deltavirus  
283 (scDeV), *Erythrura gouldiae* deltavirus (egDeV), *Marmota monax* deltavirus (mmDeV),  
284 and *Odocoileus virginianus* (ovDeV), respectively. All the contigs showed 36.0-66.7%  
285 amino acid sequence similarities to delta antigens (DAg) of known deltaviruses (Table  
286 1, Supp Tables 1 and 2). Among those, tgDeV, mmDeV, and ovDeV contigs are  
287 approximately 1,700 nucleotides in length, each of which contains one ORF showing  
288 sequence similarity to DAg genes of know deltaviruses (Table 1, Supp Tables 1 and 2).  
289 On the other hand, the remaining two contigs, scDeV, and egDeV are 761 and 596  
290 nucleotides in length, respectively (Supp Tables 1 and 2). While the contig obtained  
291 from common canary covers the whole ORF region of DAg gene, that of Gouldian finch  
292 seems to be partial, which apparently lacks the C-terminal region of DAg (Fig. 1b, Supp  
293 Table 2). Note that the nucleotide sequences of tgDeV and egDeV are almost identical  
294 (97.7% nucleotide identity), and thus we hereafter mainly analyzed tgDeV instead of  
295 both tgDeV and egDeV.

296

### 297 *Genome structures of novel avian and mammalian deltaviruses*

298 Because the three contigs (tgDeV, mmDeV, and ovDeV) are almost identical in length  
299 to full-length genomes of known deltaviruses, we next checked the circularities of the  
300 contigs. By self dot-plot analyses, we found each of both ends of these three contigs is  
301 identical (Supp Fig. 1), suggesting that the contigs are derived from circular RNA. To  
302 further confirm whether these contigs are circular or not, we have mapped the original  
303 RNA-seq data to the corresponding circularized contigs using the Geneious mapper. We  
304 confirmed that some of the reads properly spanned across the junctions (data not  
305 shown), indicating that the contigs are indeed derived from circular RNA. Therefore,  
306 the resultant circular contigs of tgDeV, mmDeV, and ovDeV represent the full-length  
307 viral genomes, consisting of 1,706, 1,712, and 1,690 nucleotides, respectively (Fig. 1a).

308 Next, we analyzed the nucleotide sequences of the deltaviruses in detail. The GC  
309 contents of these deltaviruses are relatively high (53.4-59.4%) (Table 1). We found that  
310 poly(A) signal sequences are present downstream of each of the putative ORFs in  
311 tgDeV, mmDeV, ovDeV, and scDeV (Figs. 1a and b). We also analyzed the self-  
312 complementarity of tgDeV, mmDeV, and ovDeV genomes by mfold web server (34),  
313 which indicates that all the genomes show self-complementarities (Fig. 1c).

314 Additionally, we analyzed genomic and antigenomic ribozymes, which are also present  
315 or predicted to be present on all the known deltaviruses (16-19). We found putative  
316 genomic and antigenomic ribozyme sequences in the three deltaviruses (Figs. 1 and 2,  
317 Supp Table 2). All of the genomes have sequences predicted to form typical HDV  
318 ribozyme structures (Fig. 2). Overall, these genomic features are identical to those of  
319 HDVs and other deltaviruses.

320

321 ***Characterization of DAg proteins encoded by novel deltaviruses***

322 Although recently discovered non-HDV deltaviruses are distantly related to HDVs,  
323 DAg proteins of those viruses conserve biochemical features, some biologically relevant  
324 amino acid residues, and functional domains, such as post-translational modifications,  
325 coiled-coil domains, and nuclear import signals (NLSs) (16-19). Therefore, we also  
326 characterized the DAg proteins encoded by newly identified deltaviruses, revealing that  
327 many of the features are also conserved among the deltaviruses (Fig. 3a). The isoelectric  
328 points of DAg proteins from newly identified deltaviruses are 10.35 to 10.63 (Supp  
329 Table 2), which are almost identical to those of known deltaviruses. All the post-  
330 translational modification sites in HDVs are also conserved among all the DAg proteins  
331 of newly identified deltaviruses except for the serine phosphorylation site on the DAg  
332 protein of scDeV. The coiled-coil domain, which is essential for the oligomerization of  
333 DAg proteins, is also predicted to be conserved among them. The leucine zipper-like  
334 sequences are also present in all the DAg proteins. Furthermore, the NLS is conserved  
335 among the DAg proteins except that the predicted NLS of scDeV DAg protein locates at  
336 a slightly different position (Fig. 3a).

337 Human HDV expresses two DAg protein isoforms from one transcription unit by  
338 editing the UAG stop codon to UIG (recognized as UGG encoding tryptophan) via the  
339 host A-to-I RNA-editing machinery (3). Therefore, we investigated whether the newly  
340 identified deltaviruses also use this strategy or not. We mapped short reads from the  
341 SRAs, in which the viruses were initially identified, to the corresponding virus  
342 genomes, and checked the nucleotide variations at the stop codons. We found that a  
343 possible RNA-editing site at the stop codon (UAG) of ovDeV DAg gene. We observed



344 that there is a 0.4% nucleotide variation (5 of 1160 reads) at the second nucleotide  
345 position of the stop codon, all of which are G instead of the consensus nucleotide A  
346 (Fig. 3b). The quality scores of the five G variants are 35-41 (Supp Fig. 2), suggesting  
347 that this is not caused by sequencing error. Although several possibilities can be  
348 considered, such as polymerase errors, this might be produced by A-to-I editing by the  
349 ADAR1 as reported for HDV (3). However, this possible RNA editing makes only a 2-  
350 aa longer protein due to the presence of a stop codon immediately downstream of the  
351 site (Fig. 3c), and the farnesylation motif (CXXQ), which was proposed to be necessary  
352 for the interaction with hepadnaviral envelope protein (6), is absent in the longer  
353 product. These observations suggest that even if RNA editing occurs, the resultant gene  
354 product does not contribute to the interaction with hepadnaviral envelope proteins. For  
355 tgDeV and mmDeV, we did not find any nucleotide variations of the mapped reads at  
356 the stop codons (data not shown).

357

### 358 *Deltaviruses were actively infecting in the sampled host animals*

359 To reveal whether the deltaviruses were actively replicating in the sampled animals or  
360 not, we evaluated the mapping pattern of viral reads in the above-described mapping  
361 analyses. We found that the read depths on the predicted transcribed region (the DAg  
362 coding regions to poly-A signals) are much higher than the other parts on the genomes  
363 (Fig. 4), indicating that a large part of the viral reads is derived from viral mRNAs. This  
364 suggests that the detected deltaviruses were actively transcribing in the sampled host  
365 cells. The same trend was also observed in the mapping data to the scDeV genome  
366 (Supp Fig. 3).

367 We noted that the mapping pattern on the tgDeV is slightly different from others.

368 Although the higher read depth on the DA<sub>g</sub> ORF region was observed, the read depth  
369 covering approximately one-fifth of the ORF is very low (highlighted with a pink box in  
370 Fig. 4a). To gain further insights into this observation, we also mapped short reads from  
371 another tgDeV positive SRA, which is derived from the same individual as the above  
372 analysis but from a different tissue, to the tgDeV genome. We observed the same  
373 pattern: the read depth at the downstream region of DA<sub>g</sub> ORF was lower than that of  
374 the upstream region (Supp Fig. 4).

375

376 ***Evidence for circulation and recent inter-family transmission of tgDeV among***  
377 ***passerine birds***

378 We next investigated whether the detected deltaviruses have been circulating among  
379 animal populations. We first analyzed tgDeV infections in birds. We mapped publicly  
380 available RNA-seq data from birds to the tgDeV genome, and then counted the numbers  
381 of mapped reads (Table 2 and Supplementary Table 3). In total, we analyzed 6453 SRA  
382 data for tgDeV. Among them, surprisingly, tgDeV-derived reads were detected from 34  
383 SRAs from several bird species, such as zebra finch, Gouldian finch, black-headed  
384 bunting (*Emberiza melanocephala*), and yellow-bellied tit (*Pardaliparus venustulus*),  
385 including the SRAs in which tgDeV and egDeV were initially detected. All of the  
386 species belong to the order Passeriformes. Interestingly, tgDeV-positive SRAs were  
387 found in nine BioProjects. These nine BioProjects were deposited from independent  
388 researchers, and the birds were apparently obtained from different sources. Importantly,  
389 the tgDeV-positive sample in SRR9899549 (BioSample accession: SAMN12493457) is  
390 derived from a black-headed bunting caught from the wild. These data suggest that  
391 tgDeV (or tgDeV-like viruses) has been circulating among a wide range of passerine

392 birds, probably even in wild populations. The tgDeV-positive SRA data were obtained  
393 from several tissues, such as blood, kidney, and muscles, suggesting a broad tropism,  
394 viremia, and/or systemic infection of tgDeV (see also Discussion).

395 During the above analysis, we found that some of the SRA data contain many  
396 mapped reads, which could be enough to reconstruct a full genome of deltavirus.  
397 Therefore, we extracted the mapped reads, and then performed *de novo* assembly. We  
398 successfully obtained a 1708-nt circular full-genome sequence from yellow-bellied,  
399 which was designated as pvDeV. The pvDeV shows 98.2% nucleotide sequence identity  
400 to tgDeV, and its DAg protein sequence has the same characteristics as those of tgDeV  
401 (Supp Fig. 5).

402 To further investigate deltavirus infections in passerine birds, we tested bird-  
403 derived specimens by real-time RT-PCR. We analyzed 30 and 5 whole blood samples  
404 from zebra finch and Bengalese finch (*Lonchura striata* var. *domestica*) individuals,  
405 respectively. Among them, we found a sample from a Bengalese finch was positive for  
406 the real-time RT-PCR analysis. To exclude the possibility of the contamination of a  
407 plasmid used for the establishment of real-time PCR system, we also performed RT-  
408 PCR using a primer set that can distinguish an amplicon of the viral genome from that  
409 of the plasmid (Figs. 5a and b). We obtained a band of the expected size only from the  
410 cDNA sample (Fig. 5c), revealing that the bird was indeed positive for tgDeV but not  
411 false-positive by contamination. Therefore, we herein named this virus as lsDeV. We  
412 further determined the full genome sequence of lsDeV by RT-PCR and sequencing. The  
413 full-length genome consists of 1708 nt, showing 98.2% and 98.4% nucleotide identities  
414 to tgDeV and pvDeV, respectively. The genome features are almost identical to tgDeV  
415 and pvDeV (Supp Fig. 5).

416           Importantly, the sequence similarities between these passerine deltaviruses are not  
417 compatible with the co-divergence hypothesis. According to the TimeTree (42), the  
418 divergent time of the passerine deltavirus-positive birds dates back to approximately 44  
419 million years ago (Fig. 6 and Supp Fig. 6). Considering the rapid evolutionary rates of  
420 HDVs, which were estimated to be approximately  $10^{-3}$  substitutions per site per year  
421 (43-45), these viruses do not seem to have been co-diverged with the hosts, but rather it  
422 is most likely that inter-family transmissions have occurred among passerine birds  
423 relatively recently.

424

#### 425 ***Evidence for circulation of mmDeV in woodchucks***

426 We next analyzed mmDeV infections using the above mapping strategy using SRA data  
427 from animals belonging to the order Rodentia other than mice (*Mus musculus*) and rats  
428 (*Rattus norvegicus*). We analyzed 4776 SRA datasets and detected mmDeV reads  
429 exclusively from woodchucks, from 20 SRAs derived from 7 individuals (Table 2 and  
430 Supplementary Table 3). These mmDeV-positive SRAs were obtained from the same  
431 research group, but the animals are apparently obtained in different years (46, 47),  
432 suggesting the circulation of mmDeV in the woodchuck populations. The mmDeV-  
433 positive 20 SRAs are derived from liver or peripheral blood mononuclear cells (PBMC)  
434 samples.

435           To further investigate mmDeV infections in woodchuck, we tested woodchuck  
436 specimens by real-time RT-PCR. We analyzed a total of 81 woodchuck samples (liver,  
437 n= 43; serum, n= 38). However, all the samples were negative for mmDeV (data not  
438 shown).

439

440 ***No evidence of circulation for other deltaviruses***

441 We also adopted the same strategy to analyze ovDeV and scDeV infections in ruminant  
442 animals and passerine birds, respectively (Table 2 and Supp Table 3). We detected  
443 ovDeV-derived reads only from five SRAs in which ovDeV was initially identified. The  
444 SRA data were obtained from several tissues, such as the brain, muscle, testis, pedicle,  
445 and antler, suggesting systemic infection and/or viremia of ovDeV. However, it is not  
446 clear whether these samples are derived from multiple individuals or not.

447 For scDeV, we detected scDeV-derived reads only from the SRA in which the virus  
448 was initially detected. Taken together, we could not obtain evidence of the circulation of  
449 ovDeV and scDeV.

450

451 ***Phylogenetic analyses on deltaviruses***

452 To infer the evolutionary relationship of deltaviruses, we conducted a phylogenetic  
453 analysis using known and the newly identified deltavirus sequences. Here we did not  
454 include sequences of recently identified fish, toad, newt, termite, and duck-associated  
455 deltaviruses for the phylogenetic analysis because they showed very low amino acid  
456 sequence identities to newly identified deltaviruses as well as HDVs (Fig. 7a), which  
457 could cause adverse effects on the accuracy of tree (17). We also removed scDeV due to  
458 the same reason. Furthermore, we did not use tgDeV-like viruses because the sequence  
459 of this virus is almost identical to that of tgDeV. The reconstructed tree showed that the  
460 newly identified tgDeV form a strongly supported cluster with snake DeV and rodent  
461 DeV, although they are still distantly related to each other (Fig. 7b). mmDeV and  
462 ovDeV are more closely related to HDVs than the other deltaviruses.

463

464 *Candidate helper viruses for the deltaviruses*

465 To gain insights into helper viruses for the identified deltaviruses, we first analyzed the  
466 co-existing viruses in the SRA data in which the deltaviruses were detected. We  
467 performed BLASTx analyses using the contigs used to detect deltaviruses. Note that we  
468 omitted woodchuck hepatitis virus (WHV) infections in the mmDeV-positive  
469 woodchuck-derived SRAs (SRR2136864 to SRR2136999) in this analysis because the  
470 woodchucks were experimentally infected with WHV (see below). We also removed  
471 viruses infecting non-vertebrate organisms. Our BLASTx analyses revealed that some  
472 viruses seemed to have co-existed with the deltaviruses (Table 3 and Supp Table 4). In  
473 four of the tgDeV-positive SRAs from zebra finches, we detected *Serinus canaria*  
474 polyomavirus. We also detected canary bornavirus 3 and canary circovirus in the  
475 scDeV-positive RNA-seq data. Furthermore, we detected *Erythrura gouldiae*  
476 polyomavirus 1 from the egDeV-positive SRAs. Among these co-existed viruses, only  
477 canary bornavirus encode envelope protein. Note that, however, this scDeV and  
478 bornavirus-positive SRA is obtained from pooled samples, and thus it is not clear  
479 whether scDeV and canary bornavirus 3 infected the same individual or not.

480 We also cross-referenced the presence of mmDeV reads and the metadata, which  
481 would also provide insights into the helper virus of mmDeV. Among the 20 mmDeV-  
482 positive SRAs, 18 SRAs were obtained from animals experimentally infected with  
483 woodchuck hepatitis virus (WHV), which is a hepadnavirus reported to be able to be a  
484 helper virus for HDVs (48, 49). However, the other 2 SRAs (SRR437934 and  
485 SRR437938) were derived from animals confirmed to be negative for antibodies against  
486 WHV as well as WHV DNA (46). This suggests that mmDeV was transmitted to the  
487 two animals without WHV, and thus WHV may not have been the helper virus for

488 mmDeV that infected these two individuals.

489

## 490 Discussion

491 The evolution of deltaviruses, such as the origin of HDV and co-evolution of  
492 deltaviruses and their helper viruses, has been largely enigmatic. One of the reasons is  
493 that only a handful of viruses have been found, but they are genetically highly diverse  
494 (16-19). Therefore, large phylogenetic gaps were present between deltaviruses, which  
495 made it difficult to understand the evolution of deltaviruses. In this study, we identified  
496 five full genomes of novel deltaviruses from birds and mammals (Fig. 1 and Supp Fig.  
497 5), which filled some of the phylogenetic gaps (Fig. 7b). Our analyses revealed that the  
498 evolution of deltaviruses is much more complicated than previously thought. A previous  
499 study proposed a hypothesis that mammalian deltaviruses might have been co-diverged  
500 with their mammalian hosts (19). However, our phylogenetic analysis revealed that the  
501 overall tree topology of mammalian deltaviruses is not compatible with that of the host  
502 animals: ovDeV, which was detected from deer, is most closely related to human HDV  
503 (Fig. 7b). Also, both of mmDeV and rodent DeV (detected from *Proechimys*  
504 *semispinosus* (19)) were detected from rodent species but are distantly related to each  
505 other. These data suggest that mammalian deltaviruses have not always been co-  
506 diverged with the host animals. Our phylogenetic analysis also gives insights into the  
507 origin of human HDVs. As described above, ovDeV and mmDeV are the close relatives  
508 of human HDVs, suggesting that HDVs have arisen from mammalian deltaviruses.  
509 However, we cannot exclude the possibility that yet-to-be-identified viruses located  
510 between these lineages will be found from other lineages of animals.

511 Helper viruses for non-HDV deltaviruses other than the snake deltavirus (20) are  
512 still enigmatic, but hepadnaviruses may not be helper viruses for the newly identified  
513 deltaviruses in this study, as suggested for other non-HDV deltaviruses (16-19). Here,



514 we only detected bornavirus, circovirus, and polyomavirus but not hepadnavirus as co-  
515 existing viruses in the deltavirus-positive SRAs (Table 3). Additionally, two woodchuck  
516 individuals, which were demonstrated to be negative for WHV, were also positive for  
517 mmDeV. These observations suggest that hepadnaviruses are not required for the  
518 production of infectious virions of non-HDV deltaviruses. Indeed, there is no evidence  
519 that the deltaviruses identified in this study express proteins similar to the L-HDAg  
520 protein, which is expressed via RNA-editing and is essential for HDV to interact with  
521 the HBV envelope protein (3, 50). For tgDeV and mmDeV, there is no evidence of  
522 RNA-editing at the stop codons (data not shown). Also, although there might be a  
523 possible RNA-editing site at the stop codon of ovDeV (Fig. 3b), this possible RNA-  
524 editing does not lead to the expression of a large isoform of DA<sub>g</sub> (L-DA<sub>g</sub>) protein  
525 containing a farnesylation site due to the presence of stop codon immediately  
526 downstream of the editing site (Fig. 3c). Furthermore, the lack of L-DA<sub>g</sub> was also  
527 observed for rodent deltavirus (19). Therefore, the L-HDA<sub>g</sub> protein expression  
528 phenotype may have acquired relatively recently after the divergence of ovDeV and the  
529 HDV lineage (Fig. 7b). Considering these observations, the relationship between  
530 deltaviruses and hepadnavirus(es) may have been established relatively recently, at least  
531 after the divergence of ovDeV and the HDV lineage (Fig. 7b).

532       Among the co-existing viruses, only the bornavirus possesses envelope  
533 glycoprotein (G protein), which might be used by deltaviruses for the production of  
534 infectious particles of non-HDV deltaviruses. Indeed, snake deltavirus was shown to  
535 utilize the envelope proteins of reptarenaviruses and hartmanviruses to produce  
536 infectious particles (20). Also, even HDV was reported to form infectious virions with  
537 envelope proteins of several RNA viruses, such as vesiculovirus, flavivirus, and

538 hepacivirus (13). Therefore, the possibility of bornavirus G protein to envelop non-  
539 HDV deltaviruses should be addressed in future studies. On the other hand, the other  
540 co-existing viruses, a circovirus and polyomaviruses, are non-enveloped, and thus it is  
541 unlikely that these viruses can be helper viruses for the deltaviruses. However, we  
542 cannot exclude the possibility that these viral capsid proteins might be involved in the  
543 transmission of deltaviruses by previously unknown mechanisms, and thus this  
544 possibility should also be tested. Another possibility is that virus-derived sequences in  
545 the host genomes, called endogenous viral elements (EVEs), might be involved in the  
546 formation of infectious particles. We here observed the expression of retroviral EVEs in  
547 some deltavirus-positive SRAs (data not shown). Although a previous study revealed  
548 that HDVs could not use envelope proteins from retroviruses (13), non-HDV  
549 deltaviruses might utilize strategies distinct from HDVs. Alternatively, non-HDV  
550 deltaviruses might not need helper viruses for the transmissions. Further biological  
551 experiments, together with molecular surveillances, would be necessary to understand  
552 the satellite-helper relationships of deltaviruses.

553         In this study, we identified avian deltaviruses relatively closely related to  
554 previously identified vertebrate deltaviruses (Fig. 7b). Although a previous study found  
555 a deltavirus from duck, this duck-associated virus was detected from  
556 oropharyngeal/cloacal swabs and is distantly related to vertebrate deltaviruses,  
557 suggesting the possibility of dietary origin (16, 19). This might also be the case for  
558 scDeV found in this study. scDeV was detected from the skin (Table 1), which can be  
559 easily contaminated by the outside environment. Additionally, although scDeV was not  
560 included in the phylogenetic analysis, the amino acid identities of DA<sub>g</sub> protein of  
561 scDeV to the other vertebrate deltaviruses are very low (32.7-39.5% amino acid

562 identities to the DAgs of other vertebrate deltaviruses) (Fig. 7a). Therefore, scDeV  
563 might be derived from contaminants, which should be addressed by further studies. On  
564 the other hand, tgDeV and tgDeV-like viruses were detected from several tissues, such  
565 as blood, kidney, and muscles (Table 2), and are clustered with snake and rodent  
566 deltaviruses in the phylogenetic analysis (Fig. 7b). These observations suggest that  
567 tgDeV and tgDeV-like viruses are authentic avian deltaviruses.

568 Here we showed the evidence that some of the newly identified deltaviruses have  
569 been circulating among animal populations. Interestingly, tgDeV and tgDeV-like viruses  
570 were detected from a wide range of passerine birds, suggesting recent inter-family  
571 transmission events of these viruses (Fig. 6). Note that in some SRAs, only a few reads  
572 could be mapped to the virus sequences, which might be attributed to index hopping  
573 (51-55) from SRAs containing many deltavirus-derived reads, and thus numbers of  
574 infected individuals and infected species might be overestimated (Table 2 and Supp  
575 Table 3). Nonetheless, this does not affect the conclusion because at least some of the  
576 SRA data from four species of birds (zebra finch, Gouldian finch, yellow-bellied tit, and  
577 black-headed bunting) were independently obtained and contain many viral reads.  
578 Interestingly, one of the deltavirus-positive SRAs (SRR9899549) was obtained from a  
579 black-headed bunting caught from wild, suggesting the inter-family transmission may  
580 have also occurred in wild populations. Taken together, this study provides the first  
581 evidence of inter-family transmission of deltavirus, which contributes to a deeper  
582 understanding of not only the evolution but also the transmission of deltaviruses.

583 Our analysis would also provide virological insights into the deltaviruses in  
584 infected individuals, such as tissue and host tropisms. The infections of tgDeV (and  
585 tgDeV-like viruses), mmDeV, and ovDeV were not limited to the liver and detected

586 from more than two different tissues (Table 2). These observations are identical to the  
587 previous findings that revealed the presence of deltaviruses in multiple organs and  
588 blood, and non-HDV deltaviruses could replicate in many cell types (19, 20). Therefore,  
589 non-HDV deltaviruses may be able to infect a wide range of tissues, cause systemic  
590 infection, and/or viremia. Additionally, rodent deltavirus and even snake deltavirus were  
591 shown to replicate also in human hepatocyte cells (20). These observations suggest that  
592 the host tropisms are broad in terms of the host species. Therefore, non-HDV  
593 deltaviruses have the potential to replicate in a wide range of host cells and species, and  
594 their helper viruses may be the determinant of cell and host tropisms.

595 Our analyses also suggest that tgDeV and mmDeV are sensitive to the host  
596 immune responses. We cross-referenced the presence of tgDeV reads and the metadata  
597 and found an interesting observation that may be involved in the virus-host interaction.  
598 BioProject PRJNA297576 contains twelve RNA-seq data from six zebra finch  
599 individuals, among which three individuals were treated with testosterone, and the other  
600 three were non-treated control (56). Interestingly, tgDeV reads were almost exclusively  
601 detected from birds treated with testosterone (Supp Fig. 7a and Supp Table 5).  
602 Testosterone is a hormone known to suppress the immune systems (57). Therefore, the  
603 testosterone treatment might have enhanced the transcription and/or replication of  
604 tgDeV, and thus the tgDeV reads were prone to be detectable by RNA-seq. We also  
605 cross-referenced the presence of mmDeV reads and the metadata. Interestingly, 18 of  
606 the 20 mmDeV-positive SRAs, which were derived from 5 individuals, were obtained  
607 from a long-term time-course experiment spanning 27 weeks (PRJNA291589) (47).  
608 Among the 18 SRAs, data from one individual (ID 1008) would provide insights into  
609 the mmDeV infection: at first (-3 week) no mapped read was detected from the

610 individual, but the proportion of mapped reads in the ID 1008 are highest at one week,  
611 and then drastically decreased with time (Supp Fig. 7b and Supp Table 6). Interestingly,  
612 a previous study also suggested that the host immune responses can clear rodent  
613 deltaviruses (19). Our observations, together with the previous finding, suggest that the  
614 host immune responses can suppress deltavirus infections and might be able to clear  
615 deltavirus infections. However, we cannot exclude the possibility of latent or low levels  
616 of persistent infections. Indeed, snake deltavirus was shown to establish a persistent  
617 infection, at least in cell culture (20). Therefore, deltaviruses might persistently infect  
618 the host cells with a low level of replications, and some stimulations, such as  
619 immunosuppression, might trigger the replications. Further studies are needed to  
620 understand the interactions between deltaviruses and their hosts.

621 The pathogenicities of non-HDV deltaviruses are still unknown. The newly  
622 identified deltaviruses in this study were detected from apparently healthy individuals  
623 except for woodchucks experimentally infected with WHV. As described above, HDVs  
624 are known to make clinical outcomes of HBV infections worse (15). Therefore, non-  
625 HDV deltaviruses might also affect the outcomes of co-infected viruses. In this study,  
626 we showed that bornavirus, circovirus, and polyomavirus co-existed with the  
627 deltaviruses (Table 3). These co-existing viruses are reported to be associated with  
628 diseases in avian species: for example, bornaviruses are the etiological agents of  
629 proventricular dilatation disease (or -like diseases) in birds (58, 59). Therefore,  
630 epidemiological studies of deltaviruses, together with co-existing viruses, would be  
631 useful to understand the pathogenicity of deltaviruses.

632 We observed that the patterns of mapped read depths in tgDeV were different from  
633 those in other deltaviruses identified in this study (Fig. 4a and Supp Fig. 4). This might

634 be because the transcription mechanism of tgDeV is distinct from those of the other  
635 deltaviruses. All deltaviruses possess the strictly conserved poly(A) signal sequence (5'-  
636 AAUAAA-3') downstream of the DA<sub>g</sub> ORF. Our analyses clearly showed that the  
637 poly(A) signals worked in mmDeV and ovDeV, since the read depth on the whole  
638 regions from ORF to poly(A) signal are much higher than the other parts (Fig. 4). On  
639 the other hand, the read depth of tgDeV on the downstream region of DA<sub>g</sub> ORF to  
640 poly(A) signal was much lower than the remaining part of ORF, suggesting the  
641 possibility that tgDeV has different transcription mechanism. However, there is no  
642 alternative poly(A) signal-like sequence near the breakpoint. Therefore, the strange  
643 mapping pattern may be derived from artifacts during the library preparation or  
644 sequencing. Further molecular biological studies are needed to understand the  
645 replication mechanisms of deltaviruses.

646       Taken together, our findings contribute to a deeper understanding of the evolution  
647 as well as the virological features of deltaviruses. Additionally, our and previous  
648 findings of novel deltaviruses also suggest the presence of yet-to-be-identified  
649 deltaviruses in diverse eukaryotes. Further investigations on animals would give further  
650 insights into the evolution of deltaviruses.

651

652 **Acknowledgments**

653 We thank Dr. Keiko Takemoto (Kyoto University) for her kind help with the  
654 bioinformatic analyses. The super-computing resources were provided by Human  
655 Genome Center, the Institute of Medical Science, the University of Tokyo, and the NIG  
656 supercomputer at ROIS National Institute of Genetics. All the silhouette images except  
657 for woodchuck were downloaded from silhouetteAC (<http://www.silhouette-ac.com/>).

658 This study was supported by the Hakubi project at Kyoto University (MH); Grant-  
659 in-Aid for Scientific Research on Innovative Areas from the Ministry of Education,  
660 Culture, Science, Sports, and Technology (MEXT) of Japan, Grant Numbers  
661 JP17H05821 (MH), JP19H04833 (MH) ; the Japan Society for the Promotion of  
662 Science KAKENHI, Grant Numbers JP19K16672 (MI), JP20J00868 (MI), and  
663 JP20H03499 (KW); AMED Grant Numbers JP20jm0210068j0002 (KW) and  
664 JP20fk0310114j0004 (KW), and JP20wm0325007h0001 (SI); JST MIRAI (SI).

665

666 **Figure legends**

667 **Figure 1. Genome organizations of newly identified deltaviruses.**

668 Schematic figures for the genome organizations of **(a)** tgDeV, mmDeV, and ovDeV  
669 (whole genomes) and **(b)** scDeV and egDeV (partial genomes). Annotations (ORF,  
670 poly-A signal, and ribozymes) are shown by colored arrow pentagons. The numbers  
671 indicate nucleotide positions. **(c)** Self-complementarities of newly identified  
672 deltaviruses. Circular structure plots of tgDeV, mmDeV, and ovDeV are shown. The  
673 RNA structures were predicted, and then visualized on the mfold web server (34). Red,  
674 blue, and green arcs indicate G-C, A-U, and G-U pairs, respectively.

675

676 **Figure 2. Putative structures of ribozymes on deltavirus genomes and antigenomes.**

677 Putative genomic and antigenomic ribozyme structures of tgDeV, mmDeV, and ovDeV.  
678 Gray numbers show nucleotide positions on each putative ribozyme. The blue letters  
679 show the names of secondary structural elements of ribozymes. Catalytic active sites are  
680 shown by pink triangles.

681

682 **Figure 3. Amino acid sequence characterization of putative delta antigens of newly**  
683 **identified deltaviruses.**

684 **(a)** Amino acid sequence alignment of putative S-HDAg and DAgs of representative  
685 HDVs and newly identified deltaviruses, respectively, are shown. (Putative) functional  
686 domains are shown by colored boxes. Me: arginine methylation site, Ac: lysine  
687 acetylation site, P: Serine phosphorylation site. **(b)** Schematic figure of ovDeV mRNA  
688 (upper panel) and a possible A-to-I RNA-editing site on it (lower panel). Consensus  
689 ovDeV DAg mRNA sequence and mapped read sequence with possible RNA-edited



690 nucleotide (blue boxes) are shown. Pink boxes indicate the ORF region of ovDeV DAg.  
691 (c) Deduced amino acid sequences of ovDeV DAg proteins translated from mRNA with  
692 or without RNA-editing. Blue letter shows the possible RNA-editing.

693

694 **Figure 4. Mapping coverages of original short reads of each of the contigs.**

695 Mapped read graphs of (a) tgDeV, (b) mmDeV, and (c) ovDeV are shown. Lines, arrow  
696 pentagons, and arrowheads indicate viral genomes, ribozymes, and poly(A) signals,  
697 respectively. Numbers above the graphs show nucleotide positions. Light pink box  
698 indicates low read depth region in the putative transcript of tgDeV.

699

700 **Figure 5. Detection of a delta viruse from *Lonchura striata* by RT-PCR**

701 Schematic figure of (a) the plasmid used for the establishment of real-time PCR  
702 detection system for tgDeV and (b) tgDeV circular geonome. The blue arrows indicate  
703 the primers used for endo-point RT-PCR detection. (c) Endo-point RT-PCR for  
704 detection of circular deltavirus genome. M: 100 bp ladder marker.

705

706 **Figure 6. Interfamily transmission of deltaviruses among passerine birds.**

707 (a) Schematic tree of passerine birds positive for deltaviruses. The tree of birds,  
708 presence of deltaviruses and thier names are indicated. MYA: million years ago. (b)  
709 Pairwise nuclotide identities between deltaviruses detected from passerine birds.

710

711 **Figure 7. Phylogenetic relationship of deltaviruses.**

712 (a) Heatmap of pairwise amino acid sequence identities between deltaviruses. (b) The  
713 phylogenetic tree was inferred by the maximum likelihood method using an amino acid

714 sequence alignment of representative deltaviruses. Known phenotypes, RNA-editing  
715 and large isoform of DAg protein expression, and helper virus(es) of each virus are  
716 shown at the right side of tree. Note that the SDeV phenotypes are shown in gray letters  
717 because there is insufficient information and/or evidence for the RNA-editing and L-  
718 DAg expression. The deltaviruses identified in this study were shown with blue circles.  
719 Bootstrap values more than 70 are shown. SDeV: snake deltavirus, RDeV: rodent  
720 deltavirus.

**Table 1. Summary of newly identified deltaviruses**

| Virus name                     | Host species | Tissue                                           | SRA<br>accession                                            | DDBJ<br>accession                                                  | Contig<br>length (nt) | GC content<br>(%) | BLASTx best hit    |                       |              |      |
|--------------------------------|--------------|--------------------------------------------------|-------------------------------------------------------------|--------------------------------------------------------------------|-----------------------|-------------------|--------------------|-----------------------|--------------|------|
|                                |              |                                                  |                                                             |                                                                    |                       |                   | Virus name         | Accession             | Identity (%) |      |
| Taeniopygia guttata DeV        | tgDeV        | <i>Taeniopygia guttata</i>                       | Scapulohumeralis<br>caudalis                                | SRR2545946                                                         | BR001665              | 1706              | 56.6               | Rodent deltavirus     | QJD13558     | 63.3 |
| Marmota monax DeV              | mmDeV        | <i>Marmota monax</i>                             | Liver                                                       | SRR2136906                                                         | BR001661              | 1712              | 53.4               | Hepatitis delta virus | AIR77039     | 60.0 |
| Odocoileus virginianus DeV     | ovDeV        | <i>Odocoileus virginianus</i>                    | Pedicle                                                     | SRR4256033                                                         | BR001662              | 1690              | 56.4               | Hepatitis delta virus | AHB60712     | 66.7 |
| Erythrura gouldiae DeV         | egDeV        | <i>Erythrura gouldiae</i>                        | Skin                                                        | SRR7504989                                                         | BR001660              | 596               | 59.4 <sup>a)</sup> | Rodent deltavirus     | QJD13555     | 63.5 |
| Serinus canaria-associated DeV | scDeV        | <i>Serinus canaria</i>                           | Skin                                                        | SRR2915371                                                         | BR001664              | 761               | 54.4 <sup>a)</sup> | Hepatitis delta virus | AIR77012     | 36.0 |
| Pardaliparus venustulus DeV    | pvDeV        | <i>Pardaliparus venustulus</i>                   | Lung, Kidney,<br>Cardiac muscle,<br>Flight muscle,<br>Liver | SRR7244693<br>SRR7244695<br>SRR7244696<br>SRR7244697<br>SRR7244698 | BR001663              | 1708              | 55.8               | Rodent deltavirus     | QJD13562     | 62.4 |
| Lonchura striata DeV           | lsDeV        | <i>Lonchura striata</i> var.<br><i>domestica</i> | Blood                                                       | -                                                                  | LC575944              | 1708              | 56.2               | Rodent deltavirus     | QJD13555     | 62.9 |

a) GC contents were calculated from partial genome sequence.

**Table 2. Detection of deltavirus-derived reads in RNA-seq data.**

| Virus | BioProject/<br>BioStudy | SRA        | Host                      |                                | RPM <sup>a)</sup><br>(read per million) | Tissue                    |
|-------|-------------------------|------------|---------------------------|--------------------------------|-----------------------------------------|---------------------------|
|       |                         |            | Taxonomy                  |                                |                                         |                           |
|       |                         |            | Family                    | Species                        |                                         |                           |
| tgDeV | PRJNA297576             | SRR2545943 | Estrildidae               | <i>Taeniopygia guttata</i>     | 10.28                                   | Pectoralis                |
|       |                         | SRR2545944 |                           |                                | 1.02                                    | Scapulohumeralis caudalis |
|       |                         | SRR2545946 |                           |                                | 56.73                                   | Scapulohumeralis caudalis |
|       | PRJNA558524             | SRR9899549 | Emberizidae <sup>b)</sup> | <i>Emberiza melanocephala</i>  | 3.11                                    | Blood                     |
|       | PRJNA470787             | SRR7244693 | Paridae                   | <i>Pardaliparus venustulus</i> | 10.68                                   | Lung                      |
|       |                         | SRR7244695 |                           |                                | 2.07                                    | Kidney                    |
|       |                         | SRR7244696 |                           |                                | 2.65                                    | Cardiac muscle            |
|       |                         | SRR7244697 |                           |                                | 7.12                                    | Flight muscle             |
|       |                         | SRR7244698 |                           |                                | 1.77                                    | Liver                     |
|       | PRJNA478907             | SRR7504989 | Estrildidae               | <i>Erythrura gouldiae</i>      | 1.07                                    | Skin                      |
| mmDeV | PRJNA291589             | SRR2136906 |                           | <i>Marmota monax</i>           | 70.86                                   | Liver                     |
|       |                         | SRR2136907 |                           |                                | 63.08                                   | Liver                     |
|       |                         | SRR2136916 |                           |                                | 1.02                                    | Liver                     |
|       | SRP011132               | SRR437934  |                           |                                | 46.34                                   | PBMC                      |
|       |                         | SRR437938  |                           |                                | 19.83                                   | PBMC                      |
| ovDeV | PRJNA317745             | SRR4256033 |                           | <i>Odocoileus virginianus</i>  | 180.73                                  | Pedicle                   |
| scDeV | PRJNA300534             | SRR2915371 |                           | <i>Serinus canaria</i>         | 9.79                                    | Skin                      |

Full version of the table is available as Supplementary Table 3.

a) This table shows only the samples have RPM > 1.

b) Emberizidae is regarded as the subfamily Emberizinae of the family Fringillidae in TimeTree.

**Table 3. Co-existing viruses in deltavirus-positive SRAs**

| SRA accession | Host                       |                | Virus name                        | Envelope | Deltavirus infection |
|---------------|----------------------------|----------------|-----------------------------------|----------|----------------------|
|               | Species                    | Common name    |                                   |          |                      |
| SRR2545944    | <i>Taeniopygia guttata</i> | Zebra finch    | Serinus canaria polyomavirus      | -        | tgDeV                |
| SRR5001849    | <i>Taeniopygia guttata</i> | Zebra finch    | Serinus canaria polyomavirus      | -        | tgDeV                |
| SRR5001850    | <i>Taeniopygia guttata</i> | Zebra finch    | Serinus canaria polyomavirus      | -        | tgDeV                |
| SRR5001851    | <i>Taeniopygia guttata</i> | Zebra finch    | Serinus canaria polyomavirus      | -        | tgDeV                |
| SRR2915371    | <i>Serinus canaria</i>     | Common canary  | Canary bornavirus 3               | +        | scDeV                |
|               |                            |                | Canary circovirus                 | -        |                      |
| SRR7504989    | <i>Erythrura gouldiae</i>  | Gouldian finch | Erythrura gouldiae polyomavirus 1 | -        | egDeV                |

## Reference

1. Taylor JM. 2020. Infection by Hepatitis Delta Virus. *Viruses* 12.
2. Magnius L, Taylor J, Mason WS, Sureau C, Deny P, Norder H, Ictv Report C. 2018. ICTV Virus Taxonomy Profile: Deltavirus. *J Gen Virol* 99:1565-1566.
3. Wong SK, Lazinski DW. 2002. Replicating hepatitis delta virus RNA is edited in the nucleus by the small form of ADAR1. *Proc Natl Acad Sci U S A* 99:15118-23.
4. Bergmann KF, Gerin JL. 1986. Antigens of hepatitis delta virus in the liver and serum of humans and animals. *J Infect Dis* 154:702-6.
5. Bonino F, Heermann KH, Rizzetto M, Gerlich WH. 1986. Hepatitis delta virus: protein composition of delta antigen and its hepatitis B virus-derived envelope. *J Virol* 58:945-50.
6. O'Malley B, Lazinski DW. 2005. Roles of carboxyl-terminal and farnesylated residues in the functions of the large hepatitis delta antigen. *J Virol* 79:1142-53.
7. Kuo MY, Sharmeen L, Dinter-Gottlieb G, Taylor J. 1988. Characterization of self-cleaving RNA sequences on the genome and antigenome of human hepatitis delta virus. *J Virol* 62:4439-44.
8. Sharmeen L, Kuo MY, Dinter-Gottlieb G, Taylor J. 1988. Antigenomic RNA of human hepatitis delta virus can undergo self-cleavage. *J Virol* 62:2674-9.
9. Chen PJ, Kalpana G, Goldberg J, Mason W, Werner B, Gerin J, Taylor J. 1986. Structure and replication of the genome of the hepatitis delta virus. *Proc Natl Acad Sci U S A* 83:8774-8.
10. Kos A, Dijkema R, Arnberg AC, van der Meide PH, Schellekens H. 1986. The hepatitis delta (delta) virus possesses a circular RNA. *Nature* 323:558-60.
11. Wang KS, Choo QL, Weiner AJ, Ou JH, Najarian RC, Thayer RM, Mullenbach GT, Denniston KJ, Gerin JL, Houghton M. 1986. Structure, sequence and expression of the hepatitis delta (delta) viral genome. *Nature* 323:508-14.
12. Rizzetto M. 2015. Hepatitis D Virus: Introduction and Epidemiology. *Cold Spring Harb Perspect Med* 5:a021576.
13. Perez-Vargas J, Amirache F, Boson B, Mialon C, Freitas N, Sureau C, Fusil F, Cosset FL. 2019. Enveloped viruses distinct from HBV induce dissemination of hepatitis D virus in vivo. *Nat Commun* 10:2098.
14. Littlejohn M, Locarnini S, Yuen L. 2016. Origins and Evolution of Hepatitis B

- Virus and Hepatitis D Virus. *Cold Spring Harb Perspect Med* 6:a021360.
15. Rizzetto M. 2016. The adventure of delta. *Liver Int* 36 Suppl 1:135-40.
  16. Wille M, Netter HJ, Littlejohn M, Yuen L, Shi M, Eden JS, Klaassen M, Holmes EC, Hurt AC. 2018. A Divergent Hepatitis D-Like Agent in Birds. *Viruses* 10.
  17. Chang WS, Pettersson JH, Le Lay C, Shi M, Lo N, Wille M, Eden JS, Holmes EC. 2019. Novel hepatitis D-like agents in vertebrates and invertebrates. *Virus Evol* 5:vez021.
  18. Hetzel U, Szirovicza L, Smura T, Prahauer B, Vapalahti O, Kipar A, Hepojoki J. 2019. Identification of a Novel Deltavirus in Boa Constrictors. *mBio* 10.
  19. Paraskevopoulou S, Pirzer F, Goldmann N, Schmid J, Corman VM, Gottula LT, Schroeder S, Rasche A, Muth D, Drexler JF, Heni AC, Eibner GJ, Page RA, Jones TC, Muller MA, Sommer S, Glebe D, Drosten C. 2020. Mammalian deltavirus without hepadnavirus coinfection in the neotropical rodent *Proechimys semispinosus*. *Proc Natl Acad Sci U S A* doi:10.1073/pnas.2006750117.
  20. Szirovicza L, Hetzel U, Kipar A, Martinez-Sobrido L, Vapalahti O, Hepojoki J. 2020. Snake Deltavirus Utilizes Envelope Proteins of Different Viruses To Generate Infectious Particles. *mBio* 11.
  21. Coordinators NR. 2018. Database resources of the National Center for Biotechnology Information. *Nucleic Acids Res* 46:D8-D13.
  22. Chen S, Zhou Y, Chen Y, Gu J. 2018. fastp: an ultra-fast all-in-one FASTQ preprocessor. *Bioinformatics* 34:i884-i890.
  23. Kim D, Paggi JM, Park C, Bennett C, Salzberg SL. 2019. Graph-based genome alignment and genotyping with HISAT2 and HISAT-genotype. *Nat Biotechnol* 37:907-915.
  24. Li H, Handsaker B, Wysoker A, Fennell T, Ruan J, Homer N, Marth G, Abecasis G, Durbin R, Genome Project Data Processing S. 2009. The Sequence Alignment/Map format and SAMtools. *Bioinformatics* 25:2078-9.
  25. Bankevich A, Nurk S, Antipov D, Gurevich AA, Dvorkin M, Kulikov AS, Lesin VM, Nikolenko SI, Pham S, Prjibelski AD, Pyshkin AV, Sirotkin AV, Vyahhi N, Tesler G, Alekseyev MA, Pevzner PA. 2012. SPAdes: a new genome assembly algorithm and its applications to single-cell sequencing. *J Comput Biol* 19:455-77.

26. Nurk S, Meleshko D, Korobeynikov A, Pevzner PA. 2017. metaSPAdes: a new versatile metagenomic assembler. *Genome Res* 27:824-834.
27. Li W, Godzik A. 2006. Cd-hit: a fast program for clustering and comparing large sets of protein or nucleotide sequences. *Bioinformatics* 22:1658-9.
28. Fu L, Niu B, Zhu Z, Wu S, Li W. 2012. CD-HIT: accelerated for clustering the next-generation sequencing data. *Bioinformatics* 28:3150-2.
29. Shen W, Le S, Li Y, Hu F. 2016. SeqKit: A Cross-Platform and Ultrafast Toolkit for FASTA/Q File Manipulation. *PLoS One* 11:e0163962.
30. Camacho C, Coulouris G, Avagyan V, Ma N, Papadopoulos J, Bealer K, Madden TL. 2009. BLAST+: architecture and applications. *BMC Bioinformatics* 10:421.
31. Noe L, Kucherov G. 2005. YASS: enhancing the sensitivity of DNA similarity search. *Nucleic Acids Res* 33:W540-3.
32. Bon M, Orland H. 2011. TT2NE: a novel algorithm to predict RNA secondary structures with pseudoknots. *Nucleic Acids Res* 39:e93.
33. Byun Y, Han K. 2009. PseudoViewer3: generating planar drawings of large-scale RNA structures with pseudoknots. *Bioinformatics* 25:1435-7.
34. Zuker M. 2003. Mfold web server for nucleic acid folding and hybridization prediction. *Nucleic Acids Res* 31:3406-15.
35. Ludwiczak J, Winski A, Szczepaniak K, Alva V, Dunin-Horkawicz S. 2019. DeepCoil-a fast and accurate prediction of coiled-coil domains in protein sequences. *Bioinformatics* 35:2790-2795.
36. Barnett DW, Garrison EK, Quinlan AR, Stromberg MP, Marth GT. 2011. BamTools: a C++ API and toolkit for analyzing and managing BAM files. *Bioinformatics* 27:1691-2.
37. Katoh K, Standley DM. 2013. MAFFT multiple sequence alignment software version 7: improvements in performance and usability. *Mol Biol Evol* 30:772-80.
38. Capella-Gutierrez S, Silla-Martinez JM, Gabaldon T. 2009. trimAl: a tool for automated alignment trimming in large-scale phylogenetic analyses. *Bioinformatics* 25:1972-3.
39. Kozlov AM, Darriba D, Flouri T, Morel B, Stamatakis A. 2019. RAxML-NG: a fast, scalable and user-friendly tool for maximum likelihood phylogenetic inference. *Bioinformatics* 35:4453-4455.



40. Darriba D, Taboada GL, Doallo R, Posada D. 2011. ProtTest 3: fast selection of best-fit models of protein evolution. *Bioinformatics* 27:1164-5.
41. Lemoine F, Domelevo Entfellner JB, Wilkinson E, Correia D, Davila Felipe M, De Oliveira T, Gascuel O. 2018. Renewing Felsenstein's phylogenetic bootstrap in the era of big data. *Nature* 556:452-456.
42. Hedges SB, Dudley J, Kumar S. 2006. TimeTree: a public knowledge-base of divergence times among organisms. *Bioinformatics* 22:2971-2.
43. Chao YC, Tang HS, Hsu CT. 1994. Evolution rate of hepatitis delta virus RNA isolated in Taiwan. *J Med Virol* 43:397-403.
44. Krushkal J, Li WH. 1995. Substitution rates in hepatitis delta virus. *J Mol Evol* 41:721-6.
45. Alvarado-Mora MV, Romano CM, Gomes-Gouvea MS, Gutierrez MF, Carrilho FJ, Pinho JR. 2011. Dynamics of hepatitis D (delta) virus genotype 3 in the Amazon region of South America. *Infect Genet Evol* 11:1462-8.
46. Fletcher SP, Chin DJ, Ji Y, Iniguez AL, Taillon B, Swinney DC, Ravindran P, Cheng DT, Bitter H, Lopatin U, Ma H, Klumpp K, Menne S. 2012. Transcriptomic analysis of the woodchuck model of chronic hepatitis B. *Hepatology* 56:820-30.
47. Fletcher SP, Chin DJ, Gruenbaum L, Bitter H, Rasmussen E, Ravindran P, Swinney DC, Birzele F, Schmucki R, Lorenz SH, Kopetzki E, Carter J, Triyatni M, Thampi LM, Yang J, AlDeghaither D, Murreddu MG, Cote P, Menne S. 2015. Intrahepatic Transcriptional Signature Associated with Response to Interferon-alpha Treatment in the Woodchuck Model of Chronic Hepatitis B. *PLoS Pathog* 11:e1005103.
48. Ryu WS, Bayer M, Taylor J. 1992. Assembly of hepatitis delta virus particles. *J Virol* 66:2310-5.
49. Gudima S, He Y, Chai N, Bruss V, Urban S, Mason W, Taylor J. 2008. Primary human hepatocytes are susceptible to infection by hepatitis delta virus assembled with envelope proteins of woodchuck hepatitis virus. *J Virol* 82:7276-83.
50. Chang FL, Chen PJ, Tu SJ, Wang CJ, Chen DS. 1991. The large form of hepatitis delta antigen is crucial for assembly of hepatitis delta virus. *Proc Natl Acad Sci U S A* 88:8490-4.

51. Kircher M, Sawyer S, Meyer M. 2012. Double indexing overcomes inaccuracies in multiplex sequencing on the Illumina platform. *Nucleic Acids Res* 40:e3.
52. Nelson MC, Morrison HG, Benjamino J, Grim SL, Graf J. 2014. Analysis, optimization and verification of Illumina-generated 16S rRNA gene amplicon surveys. *PLoS One* 9:e94249.
53. Renaud G, Stenzel U, Maricic T, Wiebe V, Kelso J. 2015. deML: robust demultiplexing of Illumina sequences using a likelihood-based approach. *Bioinformatics* 31:770-2.
54. D'Amore R, Ijaz UZ, Schirmer M, Kenny JG, Gregory R, Darby AC, Shakya M, Podar M, Quince C, Hall N. 2016. A comprehensive benchmarking study of protocols and sequencing platforms for 16S rRNA community profiling. *BMC Genomics* 17:55.
55. Wright ES, Vetsigian KH. 2016. Quality filtering of Illumina index reads mitigates sample cross-talk. *BMC Genomics* 17:876.
56. Fuxjager MJ, Lee JH, Chan TM, Bahn JH, Chew JG, Xiao X, Schlinger BA. 2016. Research Resource: Hormones, Genes, and Athleticism: Effect of Androgens on the Avian Muscular Transcriptome. *Mol Endocrinol* 30:254-71.
57. Duffy DL, Bentley GE, Drazen DL, Ball GF. 2000. Effects of testosterone on cell-mediated and humoral immunity in non-breeding adult European starlings. *Behavioral Ecology* 11:654-662.
58. Weissenböck H, Sekulin K, Bakonyi T, Hogler S, Nowotny N. 2009. Novel avian bornavirus in a nonpsittacine species (Canary; *Serinus canaria*) with enteric ganglioneuritis and encephalitis. *J Virol* 83:11367-71.
59. Rubbenstroth D, Rinder M, Stein M, Hoper D, Kaspers B, Brosinski K, Horie M, Schmidt V, Legler M, Korbel R, Staeheli P. 2013. Avian bornaviruses are widely distributed in canary birds (*Serinus canaria f. domestica*). *Vet Microbiol* 165:287-95.

# Fig. 1

a

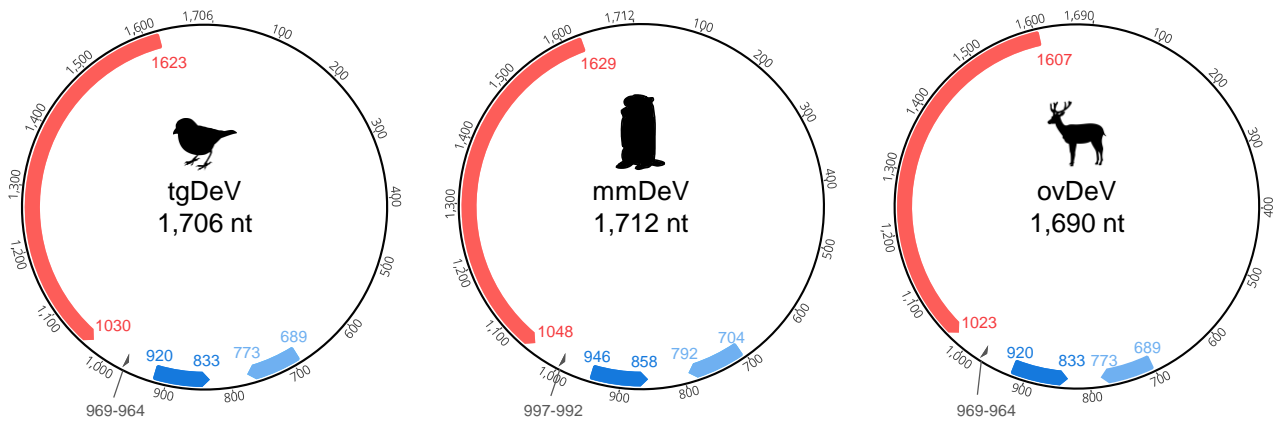

b

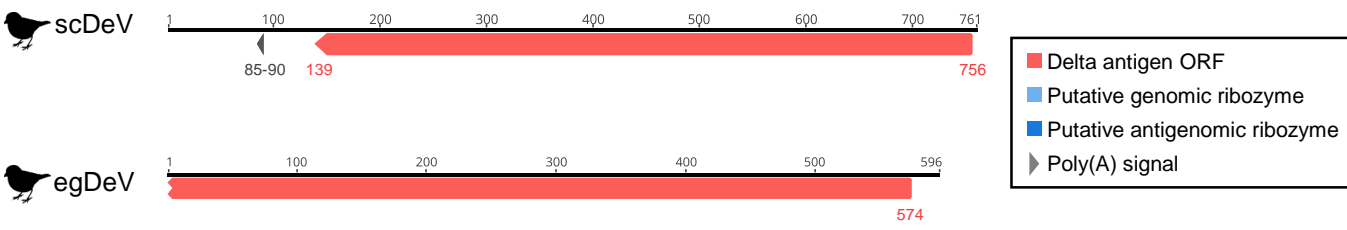

c

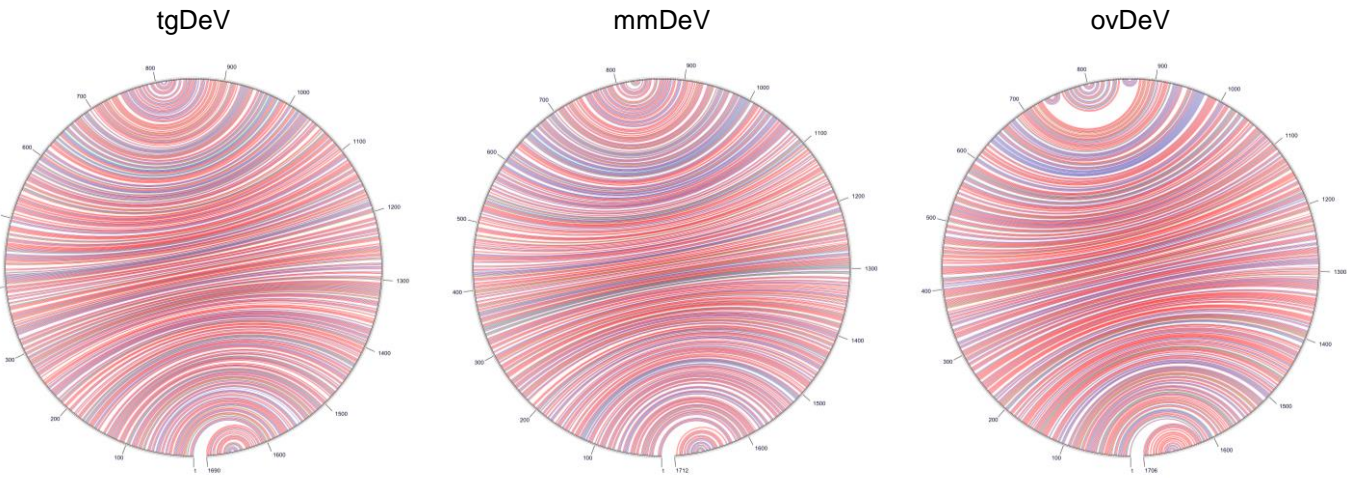

**Fig. 2****Genomic ribozyme****Antigenomic ribozyme**

tgDeV

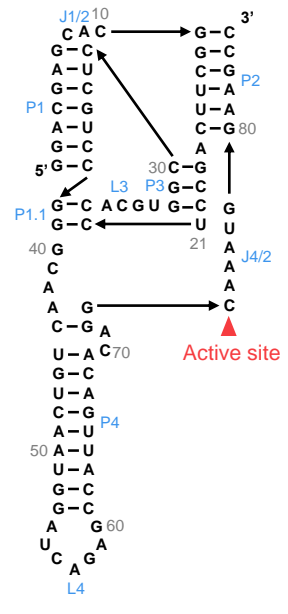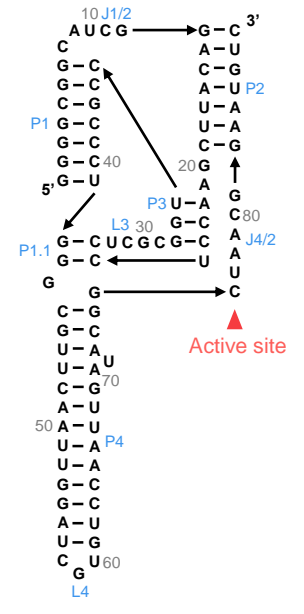

mmDeV

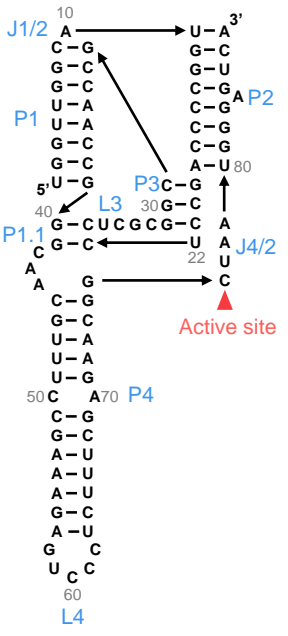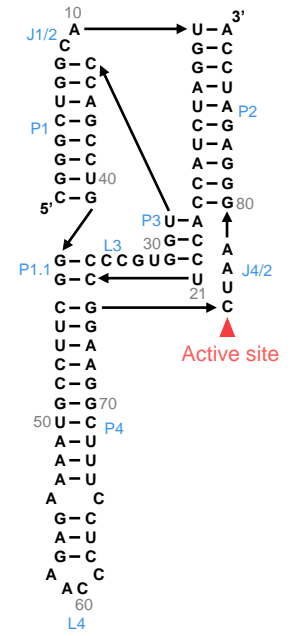

ovDeV

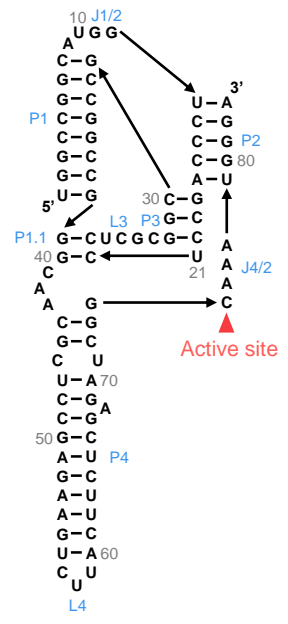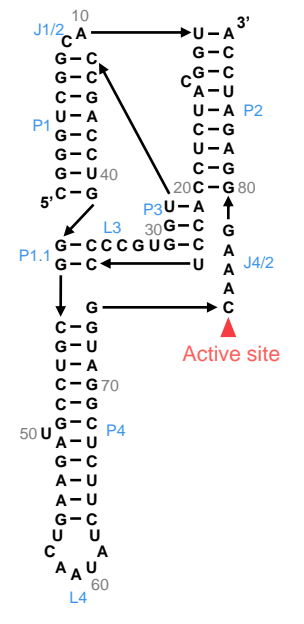

# Fig. 3

**a**

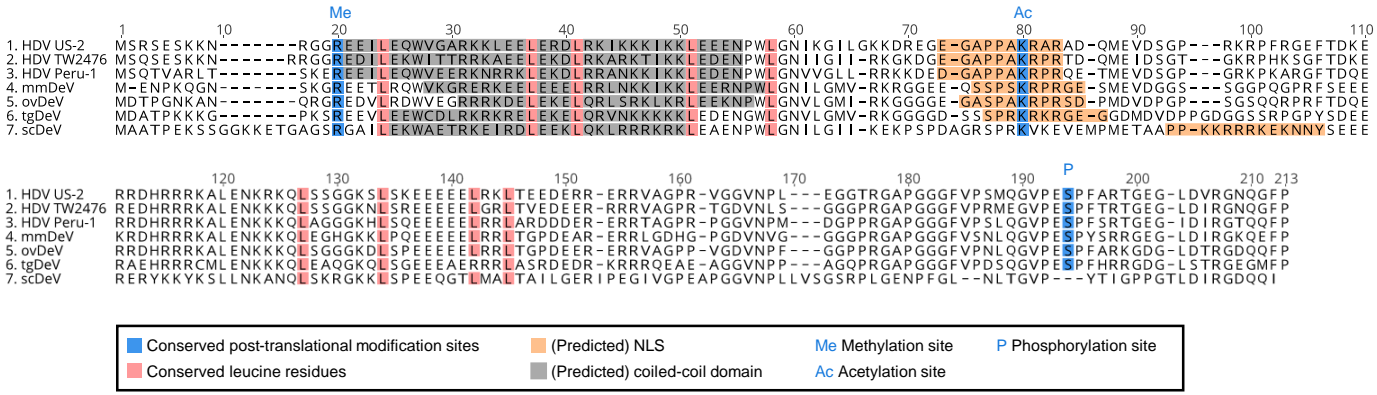

**b**

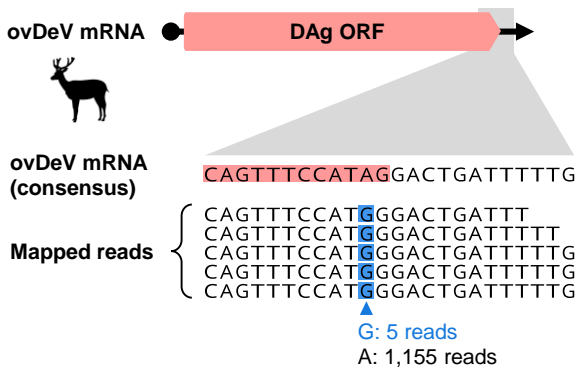

**c**

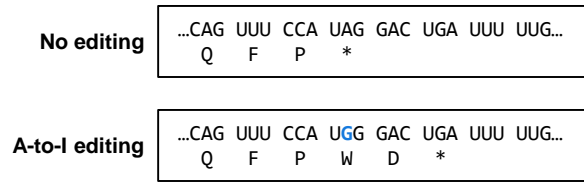

**Fig. 4**

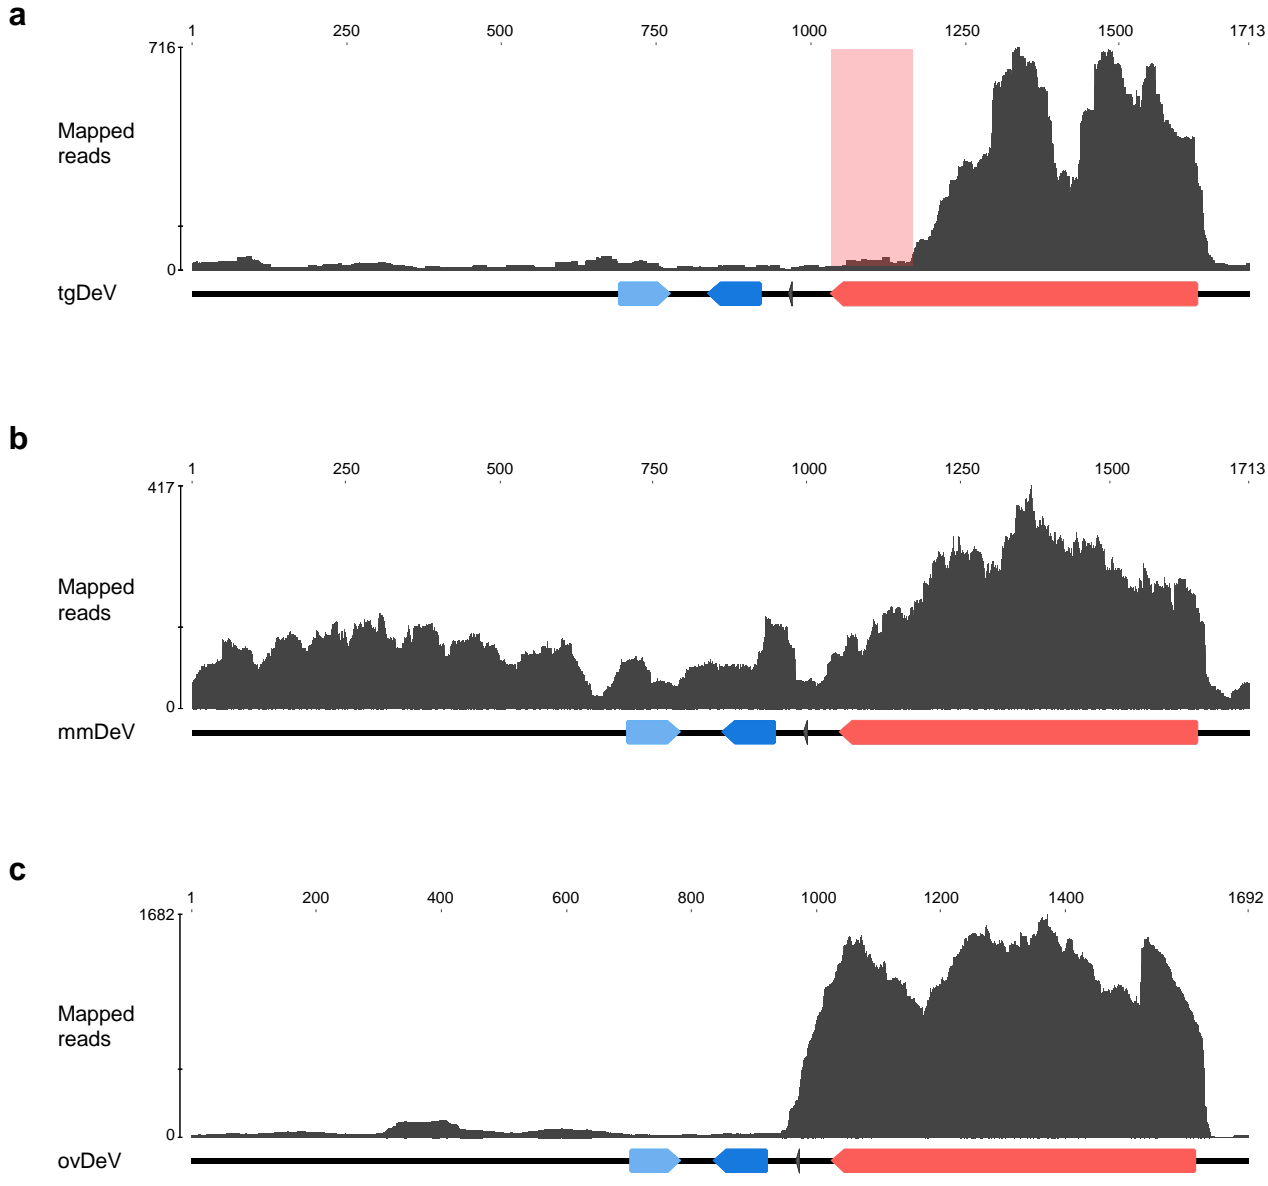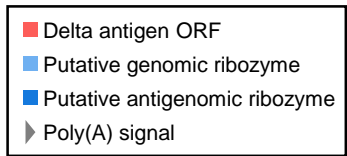

# Fig. 5

**a**

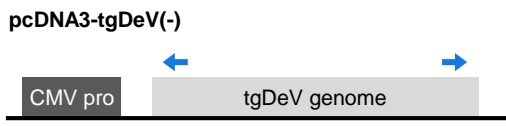

**b**

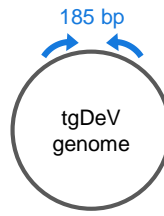

**c**

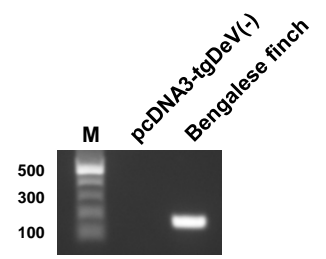

# Fig. 6

**a**

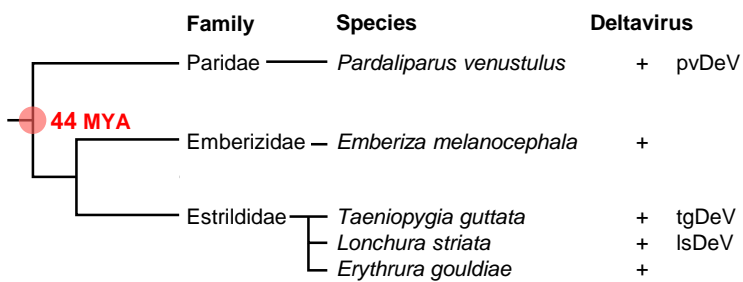

**b**

| Nucleotide identity (%) |       |       |       |
|-------------------------|-------|-------|-------|
|                         | pvDeV | tgDeV | IsDeV |
| pvDeV                   |       | 98.2  | 98.4  |
| tgDeV                   | 98.2  |       | 98.2  |
| IsDeV                   | 98.4  | 98.2  |       |



# Fig. 7

**a**

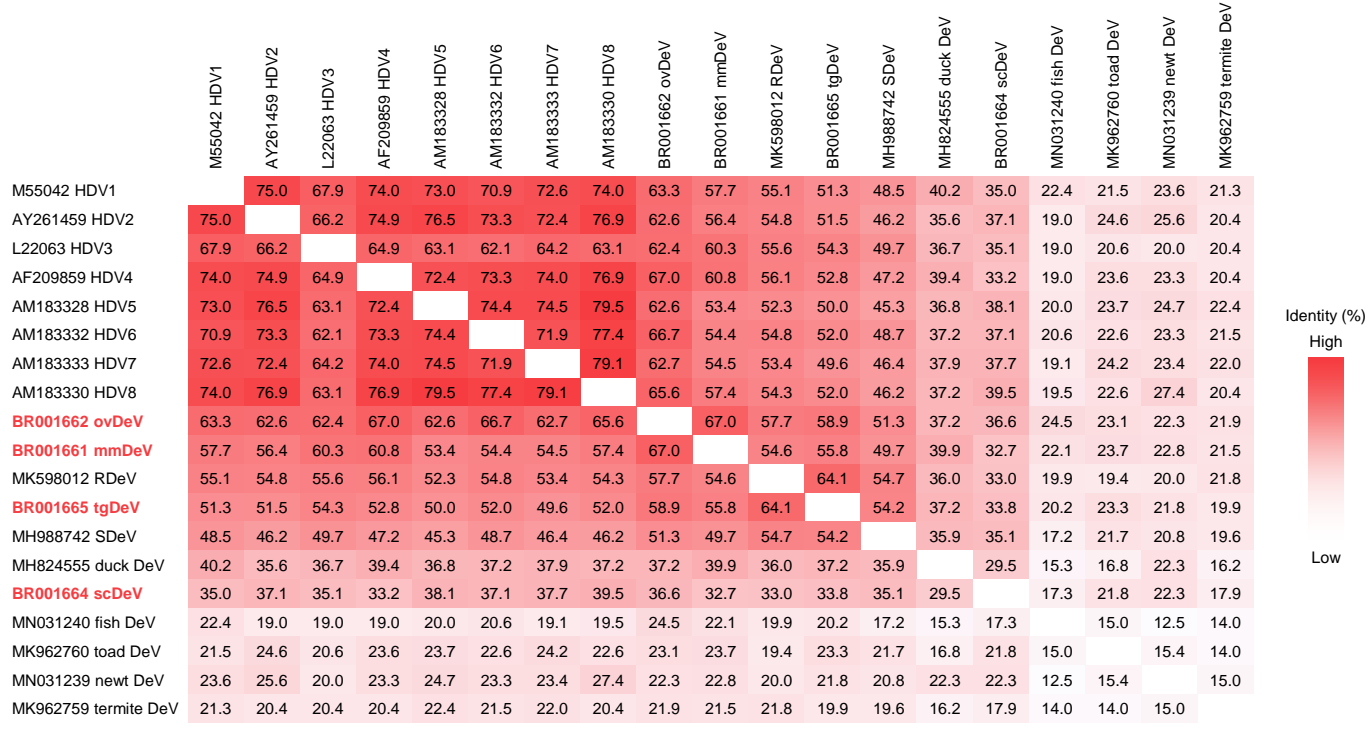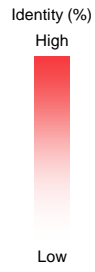

**b**

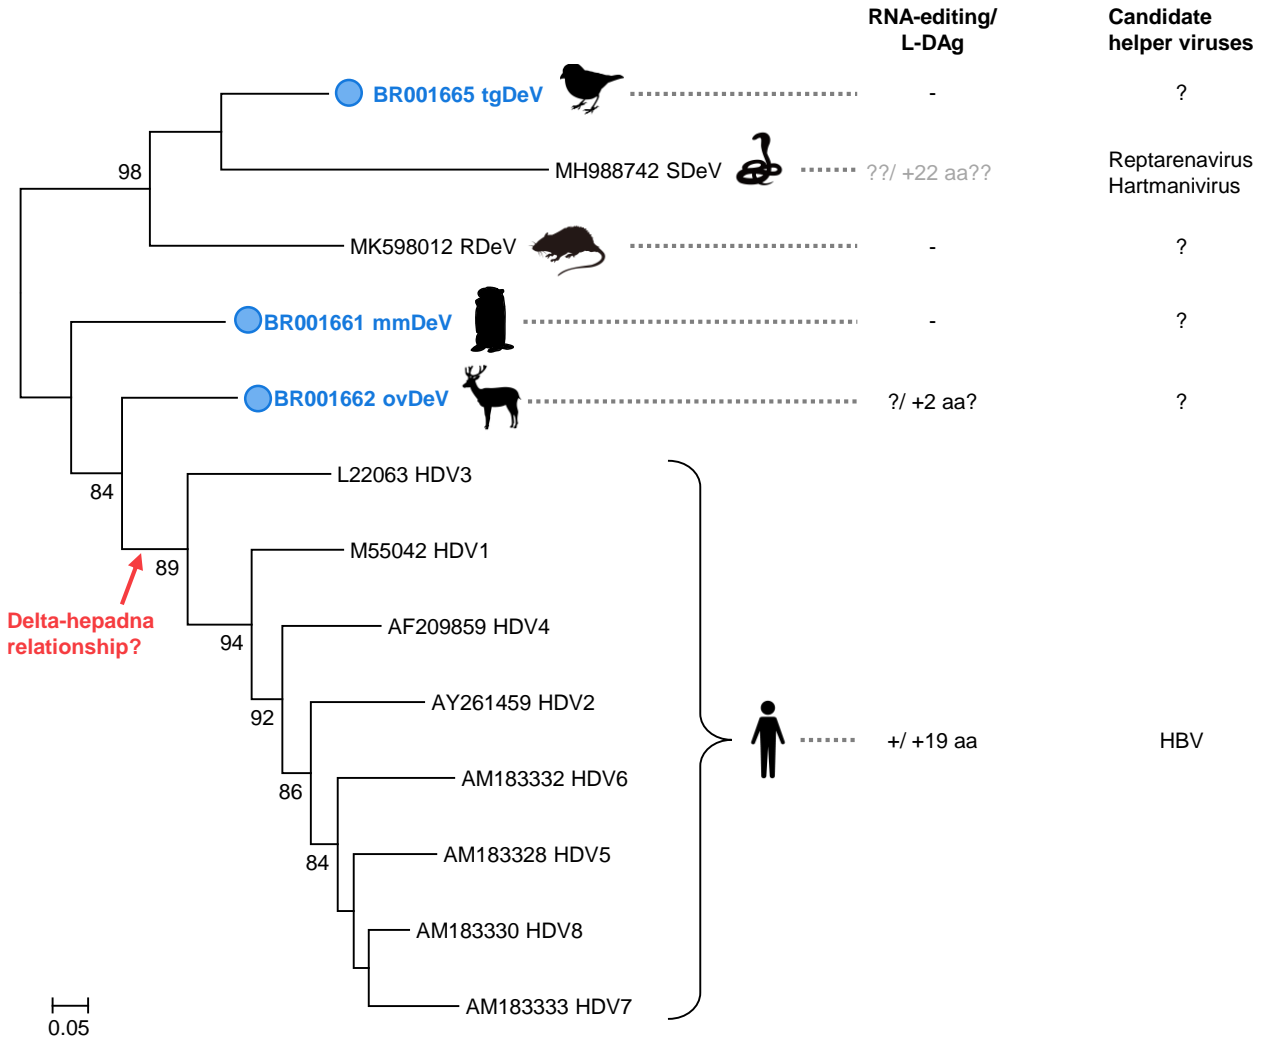

0.05
