1 **Identification of novel avian and mammalian deltaviruses provides new insights**  
2 **into deltavirus evolution**

3

4 Masashi Iwamoto<sup>1,2</sup>, Yukino Shibata<sup>3</sup>, Junna Kawasaki<sup>4,5</sup>, Shohei Kojima<sup>4,6</sup>, Yung-Tsung  
5 Li<sup>7</sup>, Shingo Iwami<sup>2</sup>, Masamichi Muramatsu<sup>1</sup>, Hui-Lin Wu<sup>7,8</sup>, Kazuhiro Wada<sup>3</sup>, Keizo  
6 Tomonaga<sup>4,5,9</sup>, Koichi Watashi<sup>1,10</sup>, Masayuki Horie<sup>4,11,\*</sup>

7

8 <sup>1</sup>*Department of Virology II, National Institute of Infectious Diseases, Tokyo, Japan*

9 <sup>2</sup>*Mathematical Biology Laboratory, Department of Biology, Faculty of Sciences, Kyushu University,*  
10 *Fukuoka, Japan*

11 <sup>3</sup>*Graduate School of Life Science, Hokkaido University, Sapporo, Hokkaido, Japan*

12 <sup>4</sup>*Institute for Frontier Life and Medical Science, Kyoto University, Kyoto, Japan*

13 <sup>5</sup>*Department of Mammalian Regulatory Network, Graduate School of Biostudies, Kyoto University,*  
14 *Kyoto, Japan*

15 <sup>6</sup>*Genome Immunobiology RIKEN Hakubi Research Team, RIKEN Cluster for Pioneering Research*

16 <sup>7</sup>*Hepatitis Research Center, National Taiwan University Hospital, Taipei, Taiwan*

17 <sup>8</sup>*Graduate Institute of Clinical Medicine, National Taiwan University College of Medicine*

18 <sup>9</sup>*Department of Molecular Virology, Graduate School of Medicine, Kyoto University, Kyoto, Japan*

19 <sup>10</sup>*Department of Applied Biological Sciences, Tokyo University of Science, Noda, Japan*

20 <sup>11</sup>*Hakubi Center for Advanced Research, Kyoto University*

21

22 \*Corresponding author

23 Masayuki Horie, DVM, PhD

24 Hakubi Center for Advanced Research, Kyoto University

25 53 Kawahara-cho, Shogo-in, Sakyo, Kyoto 606-8507, Japan

26 Email: horie.masayuki.3m@kyoto-u.ac.jp

27

28 **Abstract**

29 Hepatitis delta virus (HDV) is a satellite virus that requires hepadnavirus envelope  
30 proteins for its transmission. Although recent studies identified HDV-related deltaviruses  
31 in certain animals, the evolution of deltaviruses, such as the origin of HDV and the  
32 mechanism of its coevolution with its helper viruses, is unknown, mainly because of the  
33 phylogenetic gaps among deltaviruses. Here we identified novel deltaviruses of passerine  
34 birds, woodchucks, and white-tailed deer by extensive database searches and molecular  
35 surveillance. Phylogenetic and molecular epidemiological analyses suggest that HDV  
36 originated from mammalian deltaviruses and the past interspecies transmission of  
37 mammalian and passerine deltaviruses. Further, metaviromic and experimental analyses  
38 suggest that the satellite-helper relationship between HDV and hepadnavirus was  
39 established after the divergence of the HDV lineage from non-HDV mammalian  
40 deltaviruses. Our findings enhance our understanding of deltavirus evolution, diversity,  
41 and transmission, indicating the importance of further surveillance for deltaviruses.

## 42 **Introduction**

43 Hepatitis delta virus (HDV) is the only member of the genus *Deltavirus* which is not  
44 assigned to a family (1). The HDV genome is an approximately 1.7-kb circular, negative  
45 single-stranded RNA, harboring a single open reading frame (ORF) encoding the small  
46 and large hepatitis delta antigens (S-HDAg, 24 kDa and L-HDAg, 27 kDa) that are  
47 translated from the same transcriptional unit via RNA-editing of the stop codon, which is  
48 catalyzed by the host protein ADAR1 (2-5). The 19 amino acid residue extension of the  
49 C-terminal region of L-HDAg contains a farnesylation site required to interact with  
50 helper virus envelope proteins (6). The genome structure of HDV is unique in that it has  
51 genomic and antigenomic ribozymes, which are essential for its replication (7, 8), and is  
52 highly self-complementarity, generating a rod-like structure (9-11). Although HDV can  
53 autonomously replicate, it requires an envelope protein of other “helper” viruses to  
54 produce infectious virions. Hepatitis B virus (HBV) (family *Hepadnaviridae*) provides  
55 the envelope proteins required for HDV transmission between humans (12).  
56 Approximately 15–20 million people worldwide are estimated to be infected with HDV  
57 among 350 million HBV carriers (13). Compared with mono-infection with HBV,  
58 coinfection of HDV and HBV accelerates the pathogenic effects of HBV, such as severe  
59 or fulminant hepatitis and progression to hepatocellular carcinoma, through unknown  
60 mechanisms (14).

61       The evolutionary origin of HDV presents an enigma. However, recent discoveries of  
62 deltaviruses of vertebrate and invertebrate species (15-18), significantly changed our  
63 understanding of deltavirus evolution. These non-HDV deltaviruses are distantly related  
64 to HDV but may share the same origin because of their similarly structured circular RNA  
65 genomes (approximately 1.7 kb), which encode DA<sub>g</sub>-like proteins, possess ribozymes

66 sequences, and are highly self-complementary (15-18). These findings provide clues to  
67 the mechanism of deltavirus evolution. For example, a recent study hypothesizes that  
68 mammalian deltaviruses codiverged with their host mammalian species (18). However,  
69 the few known deltaviruses are highly divergent (15-18). Therefore, the phylogenetic  
70 gaps between the deltaviruses must be filled through the identification of putative novel  
71 deltaviruses.

72 The discoveries of non-HDV deltaviruses provides insights into the relationships  
73 between deltaviruses and their helper viruses. Recently identified non-HDV deltaviruses  
74 likely do not coinfect with hepadnaviruses, suggesting the presence of other helper  
75 viruses (15-18). This hypothesis is supported by absence of a large isoform of DA<sub>g</sub>,  
76 which is required for the interaction of HDV with the HBV envelope proteins, in rodent  
77 deltavirus (18). Further, viral envelope proteins of reptarenavirus and hartmanivirus, but  
78 not HBV, confer infectivity upon the snake deltavirus (19). These findings suggest that  
79 hepadnaviruses do not serve as helper viruses for non-HDV deltaviruses and that the  
80 deltavirus-hepadnavirus relationship is specific to the HDV lineage. However, the large  
81 phylogenetic gap between HDV and the few other deltaviruses makes it difficult to assess  
82 the hypothesis, raising the importance of further research.

83 In this study, to understand the evolution of deltaviruses, we analyzed publicly  
84 available transcriptome data and found novel mammalian and avian deltaviruses. Our  
85 phylogenetic analysis suggests that HDVs originated from non-HDV mammalian  
86 deltaviruses and does not support the codiversification hypothesis of deltavirus and  
87 mammalian evolution. Moreover, *in silico* and experimental analyses, together with  
88 previous findings, suggest that the satellite-helper relationship between HDV and  
89 hepadnavirus was established after the divergence of the novel non-HDV mammalian

90   deltaviruses and the HDV lineage. Further, we present evidence for recent interfamily  
91   transmission of deltaviruses among passerine birds. Our findings therefore provide novel  
92   insights into the evolution of deltaviruses.  
93

94 **Results**

95 ***Identification of deltavirus-related sequences in avian and mammalian transcriptomes***

96 We first assembled 46,359 RNA-seq data of birds and mammals. Using the resultant  
97 contigs as queries, we identified five deltavirus-related contigs in the SRA data of birds  
98 and mammals, including the zebra finch (*Taeniopygia guttata*), common canary (*Serinus*  
99 *canaria*), Gouldian finch (*Erythrura gouldiae*), Eastern woodchuck (*Marmota monax*),  
100 and white-tailed deer (*Odocoileus virginianus*). We named the deltavirus-like sequences  
101 *Taeniopygia guttata* deltavirus (tgDeV), *Serinus canaria*-associated deltavirus (scDeV),  
102 *Erythrura gouldiae* deltavirus (egDeV), *Marmota monax* deltavirus (mmDeV), and  
103 *Odocoileus virginianus* (ovDeV), respectively (Table 1).

104 The amino acid sequences translated from the contigs are 36.0%–66.7% identical to  
105 those of the DAg proteins of known deltaviruses (Table 1, Supp Tables 1 and 2). The  
106 tgDeV, mmDeV, and ovDeV contigs, which comprise approximately 1,700 nucleotides,  
107 encode one ORF with a sequence similar to those of DAg genes of known deltaviruses  
108 (Fig 1a, Table 1, Supp Tables 1 and 2). In contrast, the contigs scDeV and egDeV are 761  
109 and 596 nucleotides in length, respectively (Fig. 1b, Supp Tables 1 and 2). Note that the  
110 nucleotide sequences of tgDeV and egDeV are 97.7% identical, and we therefore  
111 analyzed tgDeV instead of tgDeV and egDeV.

112

113 ***Genome structures of novel avian and mammalian deltaviruses***

114 The three contigs (tgDeV, mmDeV, and ovDeV) are almost identical in length to the  
115 full-length genomes of known deltaviruses. We therefore checked for potential circularity  
116 of the contigs. Dot-plot analyses revealed that each of both ends of these three contigs is  
117 identical (Supp Fig. 1), suggesting that the contigs were derived from circular RNAs. We

118 further mapped the original RNA-seq data to the corresponding circularized contigs using  
119 the Geneious mapper, revealing that some of the reads properly spanned the junctions  
120 (data not shown), indicating that these contigs are derived from circular RNAs. Therefore,  
121 we designated the resultant circular contigs of tgDeV, mmDeV, and ovDeV as full-length  
122 novel deltavirus genomes (1,706, 1,712, and 1,690 nucleotides, respectively) (Fig. 1a).  
123 These novel genomes are characterized by high self-complementarity, genomic and  
124 antigenomic ribozymes, and poly(A) signals, which are conserved among known  
125 deltaviral genomes (Fig. 1 and Supp Table 2) (15-18). Further, the predicted secondary  
126 structures of the ribozymes are highly similar to those of HDV as well as those of other  
127 deltaviruses (Supp Fig. 2).

128

### 129 ***Characterization of DAg proteins encoded by the novel deltaviruses***

130 We next characterized the putative DAg proteins encoded by the novel deltaviruses. Most  
131 of their biochemical features, biologically relevant amino acid residues, and functional  
132 domains (15-18) are conserved among the DAg proteins (Fig. 2a). The isoelectric points  
133 of DAg proteins from the novel deltaviruses range from 10.35 to 10.63 (Supp Table 2),  
134 which are nearly identical to those of known deltaviruses. All the post-translational  
135 modification sites in HDAg are conserved among those of all DAg proteins of the novel  
136 deltaviruses, except for the serine phosphorylation site on scDeV-DAg (Fig. 2a). The  
137 NLS is conserved among the DAg proteins, although location of the predicted NLS of  
138 scDeV DAg protein differs (Fig. 2a).

139 We next investigated whether the novel deltaviruses utilize A-to-I RNA-editing. To  
140 answer this question, we mapped short reads of the SRA data, which we initially used to  
141 detect the deltaviruses, to identify the nucleotide variations among the stop codons. We



142 found a potential RNA-editing site within the stop codon of the ovDeV-DAG gene, in  
143 which there was 0.4% nucleotide variation (5 of 1160 reads) at the second nucleotide  
144 position of the stop codon (UAG), all of which were G instead of the consensus  
145 nucleotide A (Fig. 2b). The quality scores of the five G variants ranged from 35 to 41  
146 (Supp Fig. 3), which likely exclude the possibility of a sequencing error. This variation  
147 may be explained by A-to-I editing by ADAR1, as known for HDV (2). However,  
148 possible RNA-editing generates a protein two amino acid residues longer because of a  
149 stop codon immediately downstream (Fig. 2c). Further, the C-terminal farnesylation  
150 motif (CXXQ) required for the interaction with hepadnaviral envelope proteins (6) was  
151 absent from the longer product. These observations suggest that even if RNA-editing  
152 occurs, the resultant gene product does not contribute to the interaction with hepadnaviral  
153 envelope proteins. Further, we were unable to identify nucleotide variations of the  
154 mapped reads at the stop codons in the genomes of tgDeV and mmDeV (data not shown).

155

### 156 *The novel deltaviruses potentially replicate in their hosts*

157 To determine whether the novel deltaviruses potentially replicate in their respective,  
158 putative host species, we evaluated the mapping pattern of viral reads described above.  
159 We found that the read depths of the predicted transcribed regions (the DAG coding  
160 regions to poly-A signals) were much greater than those of the other genomic regions (Fig.  
161 3), indicating that most viral reads were derived from viral mRNAs. These findings  
162 suggest that the novel deltaviruses replicate in their hosts.

163 The mapping pattern on tgDeV differed slightly from the others. Specifically,  
164 although the read depth of the DAG ORF region was higher, the reads represented only  
165 80% of the ORF (Fig. 3a). This trend was apparent in another tgDeV-positive RNA-seq

166 data (Supp Fig. 4). However, it is not clear whether this is attributed to an artifact or  
167 actually reflects the transcription pattern of tgDeV.

168

### 169 ***Transmission of tgDeV- and tgDeV-like viruses among passerine birds***

170 We next investigated whether the novel deltaviruses are transmitted among animal  
171 populations. We first analyzed tgDeV infections in birds using RNA-seq data (Table 2  
172 and Supp Table 3). Among 6453 SRA data, tgDeV-derived reads were identified in 34  
173 SRAs, including the SRAs in which tgDeV and egDeV were initially detected. The 34  
174 tgDeV-positive SRA data were obtained from tissues such as blood, kidney, and muscles,  
175 suggesting broad tropism and viremia, or systemic infection, or both, with tgDeV.

176 Further, tgDeV sequences were detected in several bird species such as the  
177 black-headed bunting (*Emberiza melanocephala*) and yellow-bellied tit (*Pardaliparus*  
178 *venustulus*). All tgDeV-positive bird species belong to the order Passeriformes. These  
179 tgDeV-positive SRA data are included in the nine BioProjects deposited by independent  
180 researchers, and thus the birds were likely from different sources. Further, the  
181 tgDeV-positive sample in SRR9899549 (BioSample accession: SAMN12493457) is  
182 derived from a black-headed bunting caught in the wild. These data suggest that tgDeV  
183 (or tgDeV-like viruses) circulate among diverse passerine birds, even in the wild.

184 During the above analysis, we found that SRA data from the yellow-bellied tit  
185 (SRR7244693 and SRR7244695–SRR7244698) contain many reads mapped to the  
186 tgDeV genome. Therefore, we extracted the mapped reads of SRA data and performed *de*  
187 *novo* assembly. We obtained a 1707-nt circular complete genome sequence, which we  
188 designated pvDeV. The pvDeV nucleotide sequence is 98.2% identical to that of tgDeV,  
189 and the properties of its DA<sub>g</sub> protein sequence are similar to those of tgDeV DA<sub>g</sub> (Supp

190 Fig. 5).

191 We next employed real-time RT-PCR to further evaluate potential deltavirus  
192 infections of passerine birds. We analyzed 30 and 5 whole-blood samples from zebra and  
193 Bengalese finches (*Lonchura striata* var. *domestica*), respectively, and found that one  
194 Bengalese finch was positive for real-time RT-PCR test. To exclude the possibility of  
195 contamination of a plasmid used as a control for real-time PCR, we performed RT-PCR  
196 using a primer set that distinguishes viral from plasmid amplicons (Figs. 4a and b). We  
197 obtained a band of the expected size only from the cDNA sample (Fig. 4c), revealing that  
198 the bird was truly positive for a tgDeV-like virus. Therefore, we named this virus lsDeV,  
199 and further analysis revealed that its full-length genome nucleotide sequence (1708 nt) is  
200 98.2% and 98.4% identical to those of tgDeV and pvDeV, respectively. Moreover, its  
201 genome features are almost identical to those of tgDeV and pvDeV (Supp Fig. 5).

202

### 203 ***Evidence for recent interfamily transmission of deltaviruses among passerine birds***

204 We found that the sequence similarities among the passerine deltaviruses (tgDeV, pvDeV,  
205 and ls DeV) (Fig. 4d) were not consistent with evolutionary codivergence. According to  
206 the TimeTree (20), deltavirus-positive passerine birds diverged approximately 44 million  
207 years ago (Fig. 4e and Supp Fig. 6). Considering the rapid evolutionary rates of HDVs  
208 (approximately  $10^{-3}$  substitutions per site per year) (21-23), it is unlikely that these  
209 viruses codiverged with their hosts. Most likely, interfamily transmission occurred  
210 relatively recently among passerine birds.

211

### 212 ***Transmission of mmDeV among woodchucks***

213 We similarly analyzed mmDeV infections using SRA data for the order Rodentia, other

214 than mice (*Mus musculus*) and rats (*Rattus norvegicus*). Our analysis of 4776 SRA  
215 datasets detected mmDeV reads in 20 SRA data of seven woodchucks (Table 2 and Supp  
216 Table 3). Although these mmDeV-positive SRA data were contributed by the same  
217 research group, the animals were apparently obtained at different times (24, 25),  
218 suggesting that mmDeV was transmitted among woodchucks. The mmDeV-positive SRA  
219 data are derived from samples of liver or peripheral blood mononuclear cells.

220 We next used real-time RT-PCR to analyze 81 woodchuck samples (liver, n= 43;  
221 serum, n = 38). However, mmDeV was undetectable (data not shown), which may be  
222 explained by the absence of mmDeV infection or clearance, low level of infection, or  
223 both.

224

#### 225 ***No evidence of transmission of other deltaviruses***

226 We next focused on ovDeV and scDeV sequences of ruminant animals and passerine  
227 birds, respectively (Table 2 and Supp Table 3). We detected ovDeV-derived reads only in  
228 five SRA data. The SRA data were obtained from brain, muscle, testis, pedicles, and  
229 antlers, suggesting systemic infection, viremia, or both. However, we were unable to  
230 determine if these samples were derived from multiple individuals. We detected  
231 scDeV-derived reads only from the SRA data in which the virus was initially detected. We  
232 therefore were unable to provide evidence for the transmission of ovDeV and scDeV in  
233 their host animals.

234

#### 235 ***Phylogenetic relationships among deltaviruses***

236 To decipher the evolutionary relationships among deltaviruses, we conducted a  
237 phylogenetic analysis using known and the novel deltavirus sequences discovered here.

238 We did not include sequences of recently identified fish, toad, newt, termite, and  
239 duck-associated deltaviruses because they share very low amino acid sequence identities  
240 with the novel deltaviruses as well as with HDVs (Fig. 5a), which may reduce the  
241 accuracy of tree (16). We further excluded scDeV for this reason, and we did not include  
242 tgDeV-like viruses, because their sequences are nearly identical to that of tgDeV. The  
243 reconstructed tree shows that the newly identified tgDeV forms a strongly supported  
244 cluster with snake DeV and rodent DeV, although they are distantly related to each other  
245 (Fig. 5b). Note that mmDeV and ovDeV are more closely related to HDVs than the other  
246 deltaviruses.

247

#### 248 *Candidate helper viruses*

249 To gain insights into helper viruses of the novel deltaviruses, we first analyzed the  
250 coexisting viruses in the SRA data using BLASTx. Note that we omitted experimental  
251 woodchuck hepatitis virus (WHV) infections associated with the mmDeV-positive  
252 woodchuck-derived SRA data (SRR2136864 to SRR2136999). We also excluded viruses  
253 that infect invertebrates and endogenous retroviruses as well. These analyses reveal that  
254 polyomavirus, bornavirus, and circovirus sequences are present in the deltavirus-positive  
255 SRA data of passerine birds (Table 3 and Supp Table 4). Further, we detected contigs with  
256 98%–100% identities to human viruses (human mastadenovirus or mammalian  
257 rubulavirus 5) (Supp Table 4), although these may represent contamination, index  
258 hopping, or both. Among these viruses, only the genome of bornavirus encodes an  
259 envelope protein. Note that scDeV and bornavirus-positive SRA data was obtained from  
260 pooled samples (SAMN04260514), and we therefore were unable to determine whether  
261 scDeV and canary bornavirus 3 infected the same individual.

262 We next cross-referenced the mmDeV reads and the metadata, which also provide  
263 insights into the mmDeV helper virus. Among 20 mmDeV-positive SRA data, 18 were  
264 obtained from animals experimentally infected with the hepadnavirus WHV, which was  
265 experimentally shown to serve as a helper virus for HDV (26, 27). However, the other  
266 two SRA data (SRR437934 and SRR437938) were derived from animals negative for  
267 antibodies against WHV as well as WHV DNA (24). These observations suggest that  
268 mmDeV was transmitted to the two animals without WHV and that WHV therefore was  
269 not the helper virus for mmDeV that infected these two individuals.

270

#### 271 ***Replication of tgDeV and mmDeV in human and woodchuck cell lines***

272 To investigate whether the novel deltavirus sequences are replicable or not, we performed  
273 transfection-based assays in cell culture systems. We constructed plasmid expression  
274 vectors harboring the minus-strand genome of the tgDeV or mmDeV dimer sequence  
275 under the transcriptional control of the CMV promoter (see Materials and Methods). We  
276 first determined if the replication initiated by transfecting these plasmids. These plasmids  
277 express the minus-strand genome and therefore DA<sub>g</sub> protein is expressed if the viral  
278 genome replicates (19). We transfected the plasmid vectors into Huh7 human hepatic  
279 cells and WCH-17 woodchuck hepatic cells and used western blotting (Figs. 6a and b)  
280 and immunofluorescence assay (IFA) (Figs. 6c–f) to detect the expression of DA<sub>g</sub>  
281 proteins. Western blotting detected the expected bands (approximately 22 kDa) only in  
282 transfected cells (Figs. 6a and b). Note that a single specific band was detected in lysates  
283 prepared from each cell type, suggesting that tgDeV and mmDeV expressed only one  
284 DA<sub>g</sub> isoform. Consistent with the above results, specific signals were observed only in  
285 the transfected cells in IFA (Figs. 6c and d, red signals). Together, these data suggest that

286 the tgDeV and mmDeV initiated replication from the constructed plasmids in the cell  
287 culture system.

288 The DAg proteins predominantly localized to the nucleus 2 days post-transfection  
289 (Figs. 6e and f). Interestingly, large viral speckles were observed in the nucleus, similar to  
290 those detected in cells infected with HDV (28, 29). These results suggest that tgDeV and  
291 mmDeV employ a nuclear replication strategy similar to that used by HDV.

292

293 ***HBV envelope proteins do not contribute to the production of infectious tgDeV and***  
294 ***mmDeV***

295 As described in the above section “*Candidate helper viruses*”, there is no evidence of  
296 coinfections of hepadnaviruses with tgDeV or mmDeV. However, this does not  
297 necessarily mean hepadnaviruses do not serve as helper viruses for the novel deltaviruses.  
298 To determine whether tgDeV or mmDeV utilize the HBV envelope proteins (HBs), we  
299 transfected the deltavirus expression plasmids together with an HBs expression vector or  
300 the cognate empty vector into Huh7 cells. The culture supernatants were incubated with  
301 HepG2-NTCP cells, which are susceptible to HBs-dependent HDV infection (30, 31).  
302 HDV served as a control to monitor HBs-dependent virus release and subsequent cell  
303 entry. Viral RNA was undetected in supernatants of cells that did not express HBs (Fig.  
304 7a). In contrast, cotransfection of the HBs plasmid released large amounts of HDV RNA  
305 into the supernatant, consistent with published data (32), whereas tgDeV or mmDeV  
306 RNA was undetectable (Fig. 7a).

307 We next measured the amounts of viral RNA and detected DAg protein in  
308 HepG2-NTCP cells 7 days after incubation with the supernatants. HDV RNA and DAg  
309 protein were highly expressed in the infected cells (Fig. 7b and c). HDV infection was

310 inhibited by the preS1 peptide (Myrcludex B), which was shown to inhibit  
311 HBs-dependent HDV infection (33). These indicate that HDV infection is indeed  
312 mediated by the HBs. On the other hand, tgDeV and mmDeV RNA or DAg protein was  
313 undetectable, suggesting that HBs do not contribute to the production of infectious tgDeV  
314 or mmDeV.



315 **Discussion**

316 Important aspects of the evolution of deltaviruses are unknown, such as the origin of  
317 HDV and the coevolution of deltaviruses and their helper viruses, mainly because few  
318 deltaviruses are known, and they are highly genetically divergent (15-18). Therefore, the  
319 resulting large gaps in the deltavirus phylogenetic tree create a formidable obstacle to  
320 understanding deltavirus evolution. Here we identified five complete genomes of novel  
321 deltaviruses from birds and mammals (Fig. 1 and Supp Fig. 5), which partially fill these  
322 phylogenetic gaps (Fig. 5b). Moreover, our present findings reveal that the evolution of  
323 deltaviruses is much more complicated than previously thought. For example, one  
324 hypothesis states that mammalian deltaviruses codiverged with their mammalian hosts  
325 (18). However, our phylogenetic analysis shows that the tree topology of mammalian  
326 deltaviruses is incongruent with their hosts'. For example, ovDeV, which we detected in  
327 deer, is most closely related to human HDV (Fig. 5b). Further, the distantly related  
328 mmDeV and rodent DeV (detected in *Proechimys semispinosus* (18)) were detected in  
329 rodent species. These data suggest that deltaviruses were transmitted among mammalian  
330 species and did not always codiverge with their hosts. Moreover, we discovered recent  
331 interfamily transmission of passerine deltaviruses (tgDeV and its relatives) (Fig. 4e).  
332 Therefore, avian and mammalian deltaviruses may have, at least partially, evolved by  
333 interspecies transmission.

334 Our present phylogenetic analysis also gives insights into the origin of human HDVs.  
335 As described above, ovDeV and mmDeV are close relatives of human HDVs, suggesting  
336 that HDVs arose from other mammalian deltaviruses. Recent studies on the phylogeny of  
337 bat deltaviruses support our findings and conclusions (34, 35) (Supp Fig. 7). However, we  
338 were unable to exclude the possibility of infection of animal lineages apart from

339 mammals with unknown deltaviruses phylogenetically located between those viral  
340 lineages. Further investigations are required for a better understanding of the deltavirus  
341 evolution.

342       There is a paucity of knowledge about helper viruses for non-HDV deltaviruses,  
343 other than the snake deltavirus (19), although evidence indicates that hepadnaviruses may  
344 not serve as helper viruses for the novel deltaviruses discovered here, as suggested for  
345 other non-HDV deltaviruses (15-18). Here we only detected bornavirus, circovirus, and  
346 polyomavirus, but not hepadnavirus sequences in association with deltavirus-positive  
347 SRA data (Table 3). Further, mmDeV was detected in two woodchuck individuals that  
348 were demonstrated to be negative for WHV (Table 2 and Supp Table 3). Moreover, we  
349 found that HBs did not contribute to the formation of infectious tgDeV and mmDeV in  
350 cell culture experiments. These observations suggest that hepadnaviruses do not serve as  
351 helper viruses for the novel non-HDV deltaviruses detected here. Further, we were  
352 unable to demonstrate that the deltaviruses identified here express proteins similar to the  
353 L-HDAg protein (Figs. 6a and b), which is expressed via RNA-editing and is essential for  
354 HDV to interact with HBs (2, 37). Although RNA-editing may alter the stop codon of  
355 ovDeV DAg, this does not lead to the expression of a large isoform of DAg (L-DAg)  
356 protein containing a farnesylation site (Figs. 2b and c). The lack of L-DAg expression  
357 was also observed in rodent deltaviruses (18). Therefore, L-DAg expression phenotype  
358 may have been acquired after the divergence of ovDeV and the HDV lineage (Fig. 5b).

359       Among the coexisting viruses, only bornavirus produces an envelope glycoprotein  
360 (G protein), which might be used by non-HDV deltaviruses to produce infectious virions.  
361 Indeed, snake deltavirus utilizes the envelope proteins of reptarenaviruses and  
362 hartmaniviruses to produce infectious particles (19). Further, HDV forms infectious

363 virions using envelope proteins *in vitro* of RNA viruses such as vesiculovirus and  
364 hepacivirus (38). Therefore, the bornavirus G protein might envelop non-HDV  
365 deltaviruses.

366 In contrast, the coexisting viruses, circoviruses and polyomaviruses, are  
367 nonenveloped. Therefore, it is unlikely that these viruses can serve as helper viruses for  
368 the deltaviruses. However, we cannot exclude the possibility that these viral capsid  
369 proteins might contribute to the transmissibility of deltaviruses through unknown  
370 mechanisms. Additionally, virus-derived sequences in host genomes, called endogenous  
371 viral elements (EVEs), might mediate the formation of infectious particles. Here detected  
372 the expression of retroviral EVEs in certain deltavirus-positive SRA data (data not  
373 shown). Although HDVs do not use retroviral envelope proteins (38), non-HDV  
374 deltaviruses might utilize strategies distinct from those employed by HDVs. Alternatively,  
375 non-HDV deltaviruses may not require helper viruses and utilize extracellular vesicles for  
376 transmission. Further biological experiments, together with molecular surveillance, are  
377 therefore required to understand the satellite-helper relationships of deltaviruses.

378 Here we show that the sequences of tgDeV and tgDeV-like viruses, such as pvDeV  
379 and lsDeV, are relatively closely related to known vertebrate deltaviruses (Fig. 5b).  
380 Although a previous study found a deltavirus from duck, this duck-associated virus was  
381 detected in oropharyngeal/cloacal swabs and is distantly related to vertebrate deltaviruses,  
382 suggesting the possibility of its dietary origin (15, 18). This may be true for scDeV  
383 studied here. scDeV was detected in skin (Table 1). Although scDeV was excluded from  
384 our phylogenetic analysis, the amino acid identities between the DA<sub>g</sub> protein of scDeV  
385 with other vertebrate deltaviruses range from 32.7%–39.5% (Fig. 5a). Therefore, scDeV  
386 may be derived from contaminants, which should be addressed in the future. In contrast,

387 tgDeV and tgDeV-like viruses were detected in tissues such as the spleen and muscles  
388 (Table 2), suggesting that tgDeV and tgDeV-like viruses are authentic avian deltaviruses.

389 Here we show that certain novel deltaviruses are transmitted among animal  
390 populations (Table 2 and Supp Table 3). Note that few reads were mapped to the virus  
391 genomes in some SRA data, which may be attributed to index hopping (39-43) from SRA  
392 data containing numerous deltavirus-derived reads. Therefore, these data should be  
393 interpreted with caution. Nevertheless, our conclusions are not affected, because they are  
394 supported by robust data (Table 2). For data in which index hopping has possibly  
395 occurred, further analyses are needed to confirm deltavirus infections.

396 Our present analysis provides virological insights into important characteristics of  
397 deltavirus infections, such as tissue and host tropism. For example, infections with tgDeV  
398 (and tgDeV-like viruses), mmDeV, and ovDeV were not limited to the liver and were  
399 detected in at least two different tissues (Table 2). These observations are consistent with  
400 those of previous studies that non-HDV deltaviruses in multiple organs and blood and  
401 that they replicate in numerous cell types (18, 19). Therefore non-HDV deltaviruses may  
402 infect diverse tissues and cause systemic infection, viremia, or both. Further, tgDeV and  
403 mmDeV replicated in human and woodchuck cells (Fig. 6), which is consistent with the  
404 ability of the snake deltavirus to replicate in mammalian cells (19). These observations  
405 suggest that the host range of deltaviruses is broad and that the helper viruses of  
406 non-HDV deltaviruses may be the determinants of host range.

407 Our analyses further suggest that tgDeV and mmDeV are sensitive to host immune  
408 responses. We cross-referenced tgDeV reads and metadata and made an intriguing  
409 finding that may contribute to the virus-host interaction. BioProject PRJNA297576  
410 contains 12 RNA-seq data for six zebra finches (44). Interestingly, the tgDeV reads were

411 almost exclusively detected in birds treated with testosterone vs the controls (Supp Fig.  
412 8a and Supp Table 5). Therefore, the immunosuppressive effects of testosterone (45) may  
413 increase the transcription or replication of tgDeV, or both, to enable detection using  
414 RNA-seq. Further, when we cross-referenced the mmDeV reads and the metadata, we  
415 found that 18 of 20 mmDeV-positive SRA data derived from five individuals were  
416 acquired through an experiment lasting 27 weeks (PRJNA291589) (25). Among 18 SRA  
417 data, those of one individual (ID 1008) provide insights into mmDeV infection as  
418 follows: At first (-3 weeks), mapped reads were not detected, although the proportion of  
419 mapped reads were highest at one week and then drastically decreased (Supp Fig. 8b and  
420 Supp Table 6). Interestingly, a previous study suggested that the host's immune response  
421 can clear rodent deltaviruses (18). Our present observations together with this previous  
422 finding, suggest that the host immune response suppresses and then clear deltavirus  
423 infections. This may explain the low prevalence of RT-PCR-positive samples of  
424 woodchucks and passerine birds as described in the Results (sections "*Circulation of*  
425 *tgDeV and tgDeV-like viruses among passerine birds*" and "*Circulation of mmDeV in*  
426 *woodchucks*"). Note that latent or low levels of persistent deltavirus infections may occur.  
427 Indeed, snake deltavirus establishes a persistent infection in a cell culture system (19).  
428 Therefore, deltaviruses might persistently infect host cells with a low level of virus  
429 replication, and some stimulations, such as immunosuppression, may trigger robust virus  
430 replication. Further studies are therefore required to understand the interactions between  
431 deltaviruses and their hosts.

432 Together, our present data contribute to a deeper understanding of the evolution of  
433 deltaviruses and suggest the presence of undiscovered deltaviruses that infect diverse  
434 animal species. Further investigations will provide further insights into deltavirus

435 evolution.

436

437 **Materials and methods**

438 *Detection of deltaviruses from publicly available transcriptome data*

439 Paired-end, RNA-seq data from birds and mammals were downloaded from NCBI SRA  
440 (46). The SRA accession numbers used in this study are listed in Supplementary material.  
441 The downloaded SRA files were dumped using pfastq-dump (DOI:  
442 10.5281/zenodo.2590842; <https://github.com/inutano/pfastq-dump>), and then  
443 preprocessed using fastp 0.20.0 (47). If genome data of either the same species or the  
444 same genus were available, the preprocessed reads were mapped to the corresponding  
445 genome sequences (the genome information is available upon request) by HISAT2 2.1.0  
446 (48), and then unmapped paired-end reads were extracted using SAMtools 1.9 (49) and  
447 Picard 2.20.4 (<http://broadinstitute.github.io/picard/>). The extracted unmapped reads  
448 were used for *de novo* assembly. If genome data were unavailable, the preprocessed reads  
449 were directly used for *de novo* assembly. *De novo* assembly was conducted using SPAdes  
450 (50) and/or metaSPAdes (51) 3.13.0 with k-mer of 21, 33, 55, 77, and 99. The resultant  
451 contigs were clustered by cd-hit-est 4.8.1 (52, 53) with a threshold of 0.95. Finally, the  
452 clustered contigs  $\geq 500$  nt were extracted by SeqKit 0.9.0 (54), and they were used for the  
453 downstream analyses.

454 Two-step sequence similarity searches were performed to identify RNA virus-like  
455 sequences. First, BLASTx searches were performed against a custom database for RNA  
456 viruses using the obtained contigs as queries employing BLAST+ 2.9.0 (55) with the  
457 following options: -word\_size 2, -evalue  $1e^{-3}$ , max\_target\_seqs 1. The custom database of  
458 RNA viruses consisted of clustered sequences (by cd-hit 4.8.1 with a threshold of 0.98)  
459 from viruses of the realm *Riboviria* in the NCBI GenBank (the sequences were  
460 downloaded on June 2, 2019) (46). Next, the query sequences with viral hits were

461 subjected to second BLASTx analyses, which were performed against the NCBI nr  
462 database. Finally, the second blast hits with the best hit against deltaviruses were regarded  
463 as deltavirus-like agents, and they were used for detailed analyses.

464

#### 465 *Confirmation of circularities of deltavirus contigs*

466 Self dot-plot analyses of linear deltavirus contigs were conducted using the YASS online  
467 web server (29). Based on the analysis, the contigs were manually circularized using  
468 Geneious 11.1.5 (<https://www.geneious.com>). Further confirmation of the circularities of  
469 deltavirus contigs was obtained by mapping short reads to circular deltavirus contigs  
470 using Geneious software as follows. The reads used for the *de novo* assembly were first  
471 imported to Geneious, after which they were mapped to the circular contigs using the  
472 Geneious mapper. The mapped reads across the circularized boundaries were confirmed  
473 manually.

474

#### 475 *Detection of possible RNA-editing sites at stop codons of DAg genes*

476 We used the mapped reads obtained by the analyses described above to detect possible  
477 RNA-editing at the stop codons of DAg genes of deltaviruses. We analyzed the  
478 nucleotide variations (presence of variations, variant nucleotide(s), and variant  
479 frequency) of mapped reads at each of the stop codons of newly identified deltaviruses  
480 using the “Find Variation/SNPs” function in Geneious. We used a custom Python script to  
481 visualize base quality scores of the NGS reads mapped at the second nucleotide of the  
482 stop codon genome. The codes are available at following URL:  
483 [https://github.com/shohei-kojima/iwamoto\\_et\\_al\\_2020](https://github.com/shohei-kojima/iwamoto_et_al_2020).

484



485 *Sequence characterization*

486 DAg ORFs were detected by the “Find ORFs” function in Geneious with a threshold of  
487 500 nucleotides. Poly(A) signals were manually detected. Putative ribozyme sequences  
488 were identified using nucleotide sequence alignment with other deltaviruses. Ribozyme  
489 structures were first inferred using the TT2NE webserver (56), and the obtained data were  
490 then visualized using the PsudoViewer3 web server (57). We used the visualized data as  
491 guides to draw ribozyme structures.

492 The self-complementarities of deltavirus-like contigs were analyzed using the Mfold  
493 web server (58). Coiled-coil domains and nuclear export signals (NLSs) were predicted  
494 using DeepCoil (59) and NLS mapper  
495 ([http://nls-mapper.iab.keio.ac.jp/cgi-bin/NLS\\_Mapper\\_form.cgi](http://nls-mapper.iab.keio.ac.jp/cgi-bin/NLS_Mapper_form.cgi)) web servers,  
496 respectively.

497

498 *Short read mapping for detection of deltavirus infection*

499 To detect deltavirus-derived reads in publicly available RNA-seq data, short reads were  
500 mapped to deltavirus genomes and then the numbers of mapped reads were counted as  
501 follows. SRA files were downloaded from NCBI, dumped, and preprocessed following  
502 the procedure described above. The preprocessed reads were then mapped to linearized  
503 deltavirus contigs by HISAT2 with the default setting. SAM tools were used to extract the  
504 mapped BAM files from the resultant BAM files, and the mapped read numbers were  
505 counted using BamTools 2.5.1 (60).

506

507 *Recovery of a deltavirus genome from RNA-seq data of *Pardaliparus venustulus**

508 Mapped reads obtained from SRR7244693, SRR7244695, SRR7244696, SRR7244697,

509 and SRR7244698 in the above analysis (section *Short read mapping for detection of*  
510 *deltavirus infection*) were extracted by Geneious. All the extracted reads were  
511 co-assembled using Geneious Assembler with the circular contig assembly function. The  
512 obtained circular contigs were characterized as described previously.

513

#### 514 *Animals and samples*

515 Zebra finches (n = 30) and Bengalese finches (n = 5) were obtained from breeding  
516 colonies at Wada lab, Hokkaido University. The founder birds were originally obtained  
517 from local breeders in Japan. Five to twelve birds were kept together in cages in an aviary  
518 and were exposed to a 13:11 light-dark cycle. Blood samples were collected from the  
519 wing vein using 30 G × 8 mm syringe needles (Becton Dickinson; Franklin Lakes, NJ,  
520 USA). Each blood sample was diluted 1.5 times with PBS, frozen immediately on dry ice  
521 after collection, and maintained at –80°C until further requirement. These experiments  
522 were conducted under the guidelines and with the approval of the Committee on Animal  
523 Experiments of Hokkaido University. These guidelines are based on the national  
524 regulations for animal welfare in Japan (Law for the Humane Treatment and  
525 Management of Animals with partial amendment No.105, 2011).

526 Woodchucks (*Marmota monax*) were purchased from Northeastern Wildlife  
527 (Harrison, ID, USA) and kept at the Laboratory Animal Center, National Taiwan  
528 University College of Medicine. At three days of age, the animal supplier infected  
529 captive-born woodchucks with WHV from the same infectious pool. Wild-caught  
530 woodchucks were infected naturally and live trapped. Serum samples were collected  
531 from the woodchucks periodically via the femoral vein by means of venipuncture. Liver  
532 tissues of woodchucks were obtained at autopsy, snap-frozen in liquid nitrogen, and

533 stored at  $-80^{\circ}\text{C}$  until RNA extraction. This study used liver tissues from 10 wild-caught  
534 and 33 captive-born woodchucks and serum samples from 33 wild-caught and five  
535 captive-born woodchucks. In this study, all the experimental procedures involving  
536 woodchucks were performed under protocols approved by the Institutional Animal Care  
537 and Use Committee of National Taiwan University College of Medicine.

538

539 *Real-time and Endpoint RT-PCR detection of deltaviruses from animal specimens*

540 Total RNAs were isolated from the whole blood samples from zebra finches and serum  
541 samples from woodchucks using Quick RNA Viral Kit (Zymo Research; Irvine, CA,  
542 USA). The obtained RNA samples were stored at  $-80^{\circ}\text{C}$  until further requirement. Total  
543 RNAs were also extracted from 50 mg of the woodchuck liver tissues using either Trizol  
544 (Thermo Fisher Scientific; Waltham, MA, USA) or ToTALLY RNA kit (Thermo Fisher  
545 Scientific; Waltham, MA, USA ) according to the manufacturers' instructions.

546 The obtained RNA was reverse-transcribed into cDNA using ReverTra Ace qPCR  
547 RT Master Mix (TOYOBO; Osaka, Japan), and these were used as templates for real-time  
548 PCR analyses. Real-time PCR was performed with KOD SYBR qPCR Mix (TOYOBO)  
549 and primers (Supp Table 7) using the CFX Connect Real-Time PCR Detection System  
550 (Bio-Rad; Hercules, CA, USA) according to the manufacturer's instructions. The  
551 real-time PCR systems for mmDeV and tgDeV were validated using  
552 pcDNA3-mmDeV(-) and pcDNA3-tgDeV(-) monomer, respectively, as controls.

553 End-point RT-PCR was also performed to confirm deltavirus infections. PCR was  
554 performed with Phusion Hot Start II DNA Polymerase (Thermo Fisher Scientific) using  
555 the above-described cDNAs and primers listed in Supp Table 7. The PCR products were  
556 analyzed by agarose gel electrophoresis. The obtained PCR products were purified and

557 sequenced by Sangar sequencing in FASMAC (Atsugi, Japan).

558

559 *Determination of a full genome sequence of deltavirus in passerine birds*

560 To determine the full genome sequence of detected deltaviruses, the cDNA obtained in  
561 the section “*Realtime and Endpoint RT-PCR detection of deltaviruses from animal*  
562 *specimens*” was amplified using illustra GenomiPhi V2 Kit (GE healthcare; Chicago, IL,  
563 USA). The amplified DNA was then purified with innuPREP PCRpure Kit (Analytik  
564 Jena: Jena, Germany). PCR was performed with Phusion Hot Start II DNA Polymerase  
565 using the primers listed in Supp Table 7. The PCR products were analyzed using agarose  
566 gel electrophoreses. When single bands were observed, the amplicon was purified with  
567 innuPREP PCRpure Kit. When several bands were detected, bands of the expected sizes  
568 were extracted and purified using Zymoclean Gel DNA Recovery Kit (Zymo Research).  
569 The purified amplicons were sequenced in FASMAC (Atsugi, Japan).

570

571 *Phylogenetic analysis*

572 Deduced amino acid sequences of DAg proteins were used to infer the phylogenetic  
573 relationship between deltaviruses. Multiple alignment was performed by MAFFT 7.427  
574 using the E-INS-i algorithms (61), and ambiguously aligned regions were then removed  
575 using trimAl 1.2rev59 with the --strict option (62). The phylogenetic relationship was  
576 inferred by the maximum likelihood method using RAxML Next Generation v. 0.9.0 (63).  
577 The LG+G model, which showed the lowest BIC by proptest3 3.4.2 (64), was used. The  
578 reliability of the tree was assessed by 1,000 bootstrap resampling using the transfer  
579 bootstrap expectation method (65). The alignment file is available in Supporting  
580 materials.

581

582 *Detection of co-infected viruses*

583 To identify co-infected viruses in deltavirus–positive SRAs, a three-step BLASTx search  
584 was performed. First, BLASTx searches were performed against a custom database,  
585 including RefSeq protein sequences from viruses using the assembled contigs (see the  
586 subsection *Detection of deltaviruses from publicly available transcriptome data*) as  
587 queries. The custom database was prepared as follows. Virus-derived protein sequences  
588 in the RefSeq protein database (46) were downloaded on July 17, 2020, and were  
589 clustered by cd-hit 4.8.1 (threshold = 0.9). Then, sequences of more than 100 amino acid  
590 residues were extracted using SeqKit 0.10.1 and these were used as a BLAST database.  
591 The first BLAST hits were extracted, which were used for the second BLASTx analysis.  
592 The second BLASTx analysis was performed against the NCBI RefSeq protein database.  
593 The BLAST hits with the best hit to viral sequences were extracted and used for the final  
594 BLASTx searches. The final BLASTx searches were performed against the NCBI nr  
595 database. The BLAST hits with the best hit to viral sequences were extracted and  
596 analyzed manually.

597

598 *Cell culture*

599 HepG2-NTCP cells were cultured with Dulbecco’s modified Eagle’s medium  
600 (DMEM)/F-12 + GlutaMax (Thermo Fisher Scientific) supplemented with 10 mM  
601 HEPES (Sigma Aldrich; St. Louis, MO, USA), 100 unit/ml penicillin (Meiji; Tokyo,  
602 Japan), 100 mg/ml streptomycin (Meiji), 10% FBS (Sigma Aldrich), 5 µg/ml insulin  
603 (Wako; Tokyo, Japan) and 400 g/ml G418 (Nacalai tesque). Huh7 and WCH-17 cells  
604 were maintained in DMEM (Wako) containing 10% FBS (Sigma Aldrich), 100 unit/ml

605 penicillin (Meiji), 100 mg/ml streptomycin (Meiji), 100 mM nonessential amino acids  
606 (Thermo Fisher Scientific), 1 mM sodium pyruvate (Sigma Aldrich), and 10 mM HEPES  
607 (Sigma Aldrich).

608

#### 609 *Antibody production*

610 The peptides corresponding to 65 to 78 aa (DSSSPRKRKRGE~~GG~~) of tgDeV DA<sub>g</sub> and  
611 174 to 187 aa (ESPYSRRGEGLDIR) of mmDeV DA<sub>g</sub> conjugated with cysteine at N  
612 terminus were synthesized. Each of the peptides was injected into mice, and antisera were  
613 obtained from the mice at 42 days after the peptide injections. Each of the antisera was  
614 affinity-purified using the corresponding peptide. The whole procedure was performed in  
615 SCRUM (Tokyo, Japan).

616

#### 617 *Rescue of mmDeV and tgDeV*

618 The DNA of negative-strand genomes of mmDeV and tgDeV was synthesized in  
619 GenScript Japan (Tokyo, Japan). The synthesized DNAs were inserted into the KpnI  
620 -XbaI site of the pcDNA3 vector, designated as pcDNA3-mmDeV(-) monomer and  
621 pcDNA-tgDeV (-) monomer. In addition, tandem sequences of mmDeV and tgDeV  
622 genome were inserted into the pcDNA3 vector, which were named pcDNA3-mmDeV(-)  
623 dimer and pcDNA-tgDeV (-) dimer, respectively. To rescue these viruses,  
624 pcDNA3-mmDeV(-) dimer or pcDNA-tgDeV (-) dimer was transfected into Huh7 and  
625 WCH-17 cells using Lipofectamine 3000 and Lipofectamine 2000 (Thermo Fisher  
626 Scientific), respectively, according to the manufacturer's instructions. The transfected  
627 cells were cultured for 48 h and were used for western blotting, IFA to verify DA<sub>g</sub> protein  
628 expression.

629

630 *Western blotting*

631 Cells were lysed with SDS sample buffer [100 mM Tris-HCl (pH 6.8) (Sigma Aldrich),  
632 4% SDS (Nippon gene; Tokyo, Japan), 20% glycerol (Nacalai tesque), 10%  
633 2-mercaptoethanol (Wako)]. The cell lysates were subjected to SDS-PAGE and  
634 transferred onto polyvinylidene difluoride membranes (Merck Millipore; Darmstadt,  
635 Germany). After blocking the membranes with 5% skim milk (Morinaga; Tokyo, Japan),  
636 they were reacted with anti-tgDeV DAg, anti-mmDeV DAg, or anti-actin (Sigma  
637 Aldrich) antibodies as primary antibodies, followed by reaction with horseradish  
638 peroxidase (HRP)-conjugated secondary antibodies (Cell Signaling Technology;  
639 Danvers, MA, USA).

640

641 *Indirect immunofluorescence assay (IFA)*

642 The cells were fixed in 4% paraformaldehyde (Wako) and then permeabilized using 0.3%  
643 Triton X-100 (MP Biomedicals; Santa Ana, CA, USA). After blocking the cells by  
644 incubation in PBS containing 1% bovine serum albumin (BSA) (KAC; Kyoto, Japan),  
645 they were treated with the primary antibodies against HDAg, tgDeV DAg, or mmDeV  
646 DAg and then incubated with Alexa555-conjugated secondary antibody (Thermo Fisher  
647 Scientific), together with DAPI (Nacalai tesque). To detect deltavirus-positive cells, the  
648 fluorescence signal was observed using fluorescence microscopy, BZ-X710 (KEYENCE;  
649 Osaka, Japan). High magnification examination of the subcellular localization was  
650 performed using confocal microscopy, LSM900 (ZEISS; Oberkochen, Germany).

651

652 *Deltavirus preparation and infection assay*

653 HDV was produced from the culture supernatants of Huh7 cells transfected with HDV  
654 (pSVLD3) and HBs (pT7HB2.7) expressing plasmid, as described previously (32, 66).  
655 tgDeV and mmDeV were also subjected to the same assay. The supernatants of  
656 transfected cells were collected at 6, 9, and 12 days post-transfection, and they were then  
657 filtrated and concentrated using 0.45- $\mu$ m filters and Amicon Ultra (Merck Millipore),  
658 according to the manufacturer's instructions. The concentrated supernatants were  
659 inoculated into HepG2-NTCP cells with 5% PEG8000 (Sigma Aldrich) for 24 h followed  
660 by washing to remove free viruses. The inoculated cells were cultured for 6 days and used  
661 for the downstream analyses.

662

### 663 **Acknowledgments**

664 HDV and HBs expression plasmids were kindly provided by Dr. John Taylor (the Fox  
665 Chase Cancer) and Dr. Camille Sureau (Institute National de la Transfusion Sanguine).  
666 We thank Dr. Keiko Takemoto (Kyoto University) for her kind help with the setting of  
667 computer resources. The super-computing resources were provided by Human Genome  
668 Center, the Institute of Medical Science, the University of Tokyo, and the NIG  
669 supercomputer at ROIS National Institute of Genetics. All the silhouette images except  
670 for woodchuck were downloaded from silhouetteAC (<http://www.silhouette-ac.com/>).

671 This study was supported by the Hakubi project at Kyoto University (MH);  
672 Grant-in-Aid for Scientific Research on Innovative Areas from the Ministry of Education,  
673 Culture, Science, Sports, and Technology (MEXT) of Japan, Grant Numbers  
674 JP19H04839 (SI), JP16H06429 (KT), JP16K21723 (KT), JP16H0643 (KT),  
675 JP17H05821 (MH), and JP19H04833 (MH); the Japan Society for the Promotion of  
676 Science KAKENHI, Grant Numbers JP19K16672 (MI), JP20J00868 (MI), and



677 JP20H03499 (KW); AMED Grant Numbers JP20jm0210068j0002 (KW) and

678 JP20fk0310114j0004 (KW).

679

680 **Author contributions**

681 MH conceived the study. MI, KW, and MH designed the study. MI conducted cell culture

682 experiments. MH, JK, SK performed *in silico* analyses. YS, YTL, HLW, KW, and MH

683 prepared and analyzed animal specimens. All the authors analyzed and discussed the data.

684 MI and MH wrote the manuscript.

685

686 **Figure legends**

687 **Figure 1. Genome organization of novel deltaviruses.**

688 Genomes of **(a)** tgDeV, mmDeV, and ovDeV (complete genomes) and **(b)** scDeV and  
689 egDeV (partial genomes). Annotations (ORF, poly-A signal, and ribozymes) are shown  
690 by colored arrow pentagons. The numbers indicate nucleotide positions. **(c)**  
691 Self-complementarities of novel deltaviruses. The predicted RNA structures were  
692 visualized using the Mfold web server (58). Red, blue, and green arcs indicate G-C, A-U,  
693 and G-U pairs, respectively.

694

695 **Figure 2. Amino acid sequence characterization of putative delta antigens of novel**  
696 **deltaviruses.**

697 **(a)** Alignment and functional features of the putative S-HDAg and DAgs of  
698 representative HDVs and novel deltaviruses. (Putative) functional domains are shown by  
699 colored boxes. Me: arginine methylation site, Ac: lysine acetylation site, P: Serine  
700 phosphorylation site. **(b)** ovDeV mRNA (upper panel) and a possible A-to-I RNA-editing  
701 site (lower panel). Consensus ovDeV-DAg mRNA sequence and mapped read sequence  
702 with potential RNA-edited nucleotides (blue boxes). Pink boxes indicate the ORF of  
703 ovDeV DAg. **(c)** Deduced amino acid sequences of ovDeV-DAg proteins translated from  
704 the viral mRNA with or without RNA-editing. The blue letter shows the possible  
705 RNA-editing site.

706

707 **Figure 3. Mapping coverages of original short reads of each contig.**

708 Mapped read graphs of **(a)** tgDeV, **(b)** mmDeV, and **(c)** ovDeV. Lines, arrow pentagons,  
709 and arrowheads indicate viral genomes, ribozymes, and poly(A) signals, respectively.

710 The numbers above the graphs show nucleotide positions. The light pink box indicates a  
711 low read depth region in the putative transcript of tgDeV.

712

713 **Figure 4. Interfamily transmission of deltaviruses among passerine birds.**

714 **(a–c)** RT-PCR detection of a deltavirus from *Lonchura striata*. **(a)** Plasmid used for the  
715 establishment of real-time PCR detection system for tgDeV and **(b)** the tgDeV circular  
716 genome. The blue arrows indicate the primers used for endo-point RT-PCR detection. **(c)**  
717 Endo-point RT-PCR for detection of the circular deltavirus genome. M, 100-bp ladder  
718 marker. **(d)** Pairwise nucleotide identities between deltaviruses detected in passerine  
719 birds. **(e)** Phylogenetic tree of passerine birds positive for deltaviruses. Phylogenetic tree  
720 of birds and deltavirus infections are indicated. MYA: million years ago.

721

722 **Figure 5. Phylogenetic analysis of deltaviruses.**

723 **(a)** Heat map of pairwise amino acid sequence identities between deltaviruses. **(b)** The  
724 phylogenetic tree was inferred by the maximum likelihood method using an amino acid  
725 sequence alignment of representative deltaviruses. Known phenotypes (RNA-editing and  
726 expression of the large isoform of DA<sub>g</sub> protein) and helper virus(es) of each virus are  
727 shown on the right. Note that the SDeV phenotypes are shown in gray letters, because  
728 there is insufficient information, evidence, or both for the RNA-editing and L-DA<sub>g</sub>  
729 expression. The deltaviruses identified in this study are indicated by the blue circles.  
730 Bootstrap values >70 are shown. SDeV: snake deltavirus, RDeV: rodent deltavirus.

731

732 **Figure 6. Detection of tgDeV DA<sub>g</sub> and mmDeV DA<sub>g</sub> in cells ectopically expressing**  
733 **the tgDeV or mmDeV dimer genome.**

734 **(a and b)** Western blotting analysis of Huh7 or WCH-17 cells transfected with a tgDeV or  
735 mmDeV dimer-sequence expression plasmid. The numbers on the left side of panels  
736 indicate the size marker of protein (kDa). **(c–f)** Indirect immunofluorescence analysis of  
737 the expression of tgDeV or mmDeV DAg protein. The cells were observed using  
738 fluorescent microscopy **(c and d)** or a confocal microscopy **(e and f)**. Blue; DAPI, Red;  
739 tgDeV or mmDeV DAg. Scale bars = 50  $\mu\text{m}$  (c and d) and 5  $\mu\text{m}$  (e and f).

740

741 **Figure 7. No infectious particle of tgDeV and mmDeV was produced by**  
742 **supplementation of HBV envelop proteins.**

743 **(a)** Quantification of deltavirus RNAs in culture supernatants. HDV, tgDeV, or mmDeV  
744 expression plasmid was transfected with or without plasmid expressing HBV envelope  
745 proteins into Huh7 cells. Viral RNA levels in supernatants were quantified using  
746 quantitative RT-PCR (n = 3). **(b and c)** HepG2-NTCP cells were incubated with the  
747 culture supernatants of the transfectants for 24 h in the presence or absence of 500 nM  
748 Myrcludex B (MyrB), an inhibitor of HBV envelope-dependent viral entry. The cells  
749 were cultured for an additional 6 days, and viral RNA levels and protein expression were  
750 analyzed using quantitative RT-PCR (n = 3) **(b)** and IFA **(c)**, respectively. The numbers in  
751 **(c)** correspond to those of **(b)**. Blue, DAPI; Red, HDV; tgDeV, or mmDeV DAg. Scale  
752 bar = 50  $\mu\text{m}$ .

753

754 **Reference**

- 755 1. Magnius L, Taylor J, Mason WS, Sureau C, Deny P, Norder H, Ictv Report C.  
756 2018. ICTV Virus Taxonomy Profile: Deltavirus. *J Gen Virol* 99:1565-1566.
- 757 2. Wong SK, Lazinski DW. 2002. Replicating hepatitis delta virus RNA is edited in  
758 the nucleus by the small form of ADAR1. *Proc Natl Acad Sci U S A*  
759 99:15118-23.
- 760 3. Bergmann KF, Gerin JL. 1986. Antigens of hepatitis delta virus in the liver and  
761 serum of humans and animals. *J Infect Dis* 154:702-6.
- 762 4. Bonino F, Heermann KH, Rizzetto M, Gerlich WH. 1986. Hepatitis delta virus:  
763 protein composition of delta antigen and its hepatitis B virus-derived envelope. *J*  
764 *Virol* 58:945-50.
- 765 5. Taylor JM. 2020. Infection by Hepatitis Delta Virus. *Viruses* 12.
- 766 6. O'Malley B, Lazinski DW. 2005. Roles of carboxyl-terminal and farnesylated  
767 residues in the functions of the large hepatitis delta antigen. *J Virol* 79:1142-53.
- 768 7. Kuo MY, Sharmeen L, Dinter-Gottlieb G, Taylor J. 1988. Characterization of  
769 self-cleaving RNA sequences on the genome and antigenome of human hepatitis  
770 delta virus. *J Virol* 62:4439-44.
- 771 8. Sharmeen L, Kuo MY, Dinter-Gottlieb G, Taylor J. 1988. Antigenomic RNA of  
772 human hepatitis delta virus can undergo self-cleavage. *J Virol* 62:2674-9.
- 773 9. Chen PJ, Kalpana G, Goldberg J, Mason W, Werner B, Gerin J, Taylor J. 1986.  
774 Structure and replication of the genome of the hepatitis delta virus. *Proc Natl*  
775 *Acad Sci U S A* 83:8774-8.
- 776 10. Kos A, Dijkema R, Arnberg AC, van der Meide PH, Schellekens H. 1986. The  
777 hepatitis delta (delta) virus possesses a circular RNA. *Nature* 323:558-60.
- 778 11. Wang KS, Choo QL, Weiner AJ, Ou JH, Najarian RC, Thayer RM, Mullenbach  
779 GT, Denniston KJ, Gerin JL, Houghton M. 1986. Structure, sequence and  
780 expression of the hepatitis delta (delta) viral genome. *Nature* 323:508-14.
- 781 12. Rizzetto M. 2015. Hepatitis D Virus: Introduction and Epidemiology. *Cold*  
782 *Spring Harb Perspect Med* 5:a021576.
- 783 13. Littlejohn M, Locarnini S, Yuen L. 2016. Origins and Evolution of Hepatitis B  
784 Virus and Hepatitis D Virus. *Cold Spring Harb Perspect Med* 6:a021360.
- 785 14. Rizzetto M. 2016. The adventure of delta. *Liver Int* 36 Suppl 1:135-40.
- 786 15. Wille M, Netter HJ, Littlejohn M, Yuen L, Shi M, Eden JS, Klaassen M, Holmes

- 787 EC, Hurt AC. 2018. A Divergent Hepatitis D-Like Agent in Birds. *Viruses* 10.  
788 16. Chang WS, Pettersson JH, Le Lay C, Shi M, Lo N, Wille M, Eden JS, Holmes  
789 EC. 2019. Novel hepatitis D-like agents in vertebrates and invertebrates. *Virus*  
790 *Evol* 5:vez021.
- 791 17. Hetzel U, Szirovicza L, Smura T, Prahauer B, Vapalahti O, Kipar A, Hepojoki J.  
792 2019. Identification of a Novel Deltavirus in Boa Constrictors. *mBio* 10.
- 793 18. Paraskevopoulou S, Pirzer F, Goldmann N, Schmid J, Corman VM, Gottula LT,  
794 Schroeder S, Rasche A, Muth D, Drexler JF, Heni AC, Eibner GJ, Page RA,  
795 Jones TC, Muller MA, Sommer S, Glebe D, Drosten C. 2020. Mammalian  
796 deltavirus without hepadnavirus coinfection in the neotropical rodent  
797 *Proechimys semispinosus*. *Proc Natl Acad Sci U S A*  
798 doi:10.1073/pnas.2006750117.
- 799 19. Szirovicza L, Hetzel U, Kipar A, Martinez-Sobrido L, Vapalahti O, Hepojoki J.  
800 2020. Snake Deltavirus Utilizes Envelope Proteins of Different Viruses To  
801 Generate Infectious Particles. *mBio* 11.
- 802 20. Hedges SB, Dudley J, Kumar S. 2006. TimeTree: a public knowledge-base of  
803 divergence times among organisms. *Bioinformatics* 22:2971-2.
- 804 21. Chao YC, Tang HS, Hsu CT. 1994. Evolution rate of hepatitis delta virus RNA  
805 isolated in Taiwan. *J Med Virol* 43:397-403.
- 806 22. Krushkal J, Li WH. 1995. Substitution rates in hepatitis delta virus. *J Mol Evol*  
807 41:721-6.
- 808 23. Alvarado-Mora MV, Romano CM, Gomes-Gouvea MS, Gutierrez MF, Carrilho  
809 FJ, Pinho JR. 2011. Dynamics of hepatitis D (delta) virus genotype 3 in the  
810 Amazon region of South America. *Infect Genet Evol* 11:1462-8.
- 811 24. Fletcher SP, Chin DJ, Ji Y, Iniguez AL, Taillon B, Swinney DC, Ravindran P,  
812 Cheng DT, Bitter H, Lopatin U, Ma H, Klumpp K, Menne S. 2012.  
813 Transcriptomic analysis of the woodchuck model of chronic hepatitis B.  
814 *Hepatology* 56:820-30.
- 815 25. Fletcher SP, Chin DJ, Gruenbaum L, Bitter H, Rasmussen E, Ravindran P,  
816 Swinney DC, Birzele F, Schmucki R, Lorenz SH, Kopetzki E, Carter J, Triyatni  
817 M, Thampi LM, Yang J, AlDeghather D, Murreddu MG, Cote P, Menne S. 2015.  
818 Intrahepatic Transcriptional Signature Associated with Response to  
819 Interferon-alpha Treatment in the Woodchuck Model of Chronic Hepatitis B.

- 820 PLoS Pathog 11:e1005103.
- 821 26. Ryu WS, Bayer M, Taylor J. 1992. Assembly of hepatitis delta virus particles. *J*  
822 *Virol* 66:2310-5.
- 823 27. Gudima S, He Y, Chai N, Bruss V, Urban S, Mason W, Taylor J. 2008. Primary  
824 human hepatocytes are susceptible to infection by hepatitis delta virus  
825 assembled with envelope proteins of woodchuck hepatitis virus. *J Virol*  
826 82:7276-83.
- 827 28. Zuccola HJ, Rozzelle JE, Lemon SM, Erickson BW, Hogle JM. 1998. Structural  
828 basis of the oligomerization of hepatitis delta antigen. *Structure* 6:821-830.
- 829 29. Noe L, Kucherov G. 2005. YASS: enhancing the sensitivity of DNA similarity  
830 search. *Nucleic Acids Res* 33:W540-3.
- 831 30. Yan H, Zhong G, Xu G, He W, Jing Z, Gao Z, Huang Y, Qi Y, Peng B, Wang H,  
832 Fu L, Song M, Chen P, Gao W, Ren B, Sun Y, Cai T, Feng X, Sui J, Li W. 2012.  
833 Sodium taurocholate cotransporting polypeptide is a functional receptor for  
834 human hepatitis B and D virus. *Elife* 1:e00049.
- 835 31. Iwamoto M, Watashi K, Tsukuda S, Aly HH, Fukasawa M, Fujimoto A, Suzuki  
836 R, Aizaki H, Ito T, Koiwai O, Kusuhara H, Wakita T. 2014. Evaluation and  
837 identification of hepatitis B virus entry inhibitors using HepG2 cells  
838 overexpressing a membrane transporter NTCP. *Biochem Biophys Res Commun*  
839 443:808-13.
- 840 32. Sureau C, Guerra B, Lee H. 1994. The middle hepatitis B virus envelope protein  
841 is not necessary for infectivity of hepatitis delta virus. *J Virol* 68:4063-6.
- 842 33. Gripon P, Canine I, Urban S. 2005. Efficient inhibition of hepatitis B virus  
843 infection by acylated peptides derived from the large viral surface protein. *J*  
844 *Virol* 79:1613-22.
- 845 34. Bergner LM, Orton RJ, Broos A, Tello C, Becker DJ, Carrera JE, Patel AH, Biek  
846 R, Streicker DG. 2020. Diversification of mammalian deltaviruses by host  
847 shifting. *bioRxiv* doi:10.1101/2020.06.17.156745.
- 848 35. Edgar RC, Taylor J, Altman T, Barbera P, Meleshko D, Lin V, Lohr D,  
849 Novakovsky G, Al-Shayeb B, Banfield JF, Korobeynikov A, Chikhi R, Babaian  
850 A. 2020. Petabase-scale sequence alignment catalyses viral discovery. *bioRxiv*  
851 doi:10.1101/2020.08.07.241729.
- 852 36. Anonymous. !!! INVALID CITATION !!! (34, 35).

- 853 37. Chang FL, Chen PJ, Tu SJ, Wang CJ, Chen DS. 1991. The large form of  
854 hepatitis delta antigen is crucial for assembly of hepatitis delta virus. *Proc Natl*  
855 *Acad Sci U S A* 88:8490-4.
- 856 38. Perez-Vargas J, Amirache F, Boson B, Mialon C, Freitas N, Sureau C, Fusil F,  
857 Cosset FL. 2019. Enveloped viruses distinct from HBV induce dissemination of  
858 hepatitis D virus in vivo. *Nat Commun* 10:2098.
- 859 39. Kircher M, Sawyer S, Meyer M. 2012. Double indexing overcomes inaccuracies  
860 in multiplex sequencing on the Illumina platform. *Nucleic Acids Res* 40:e3.
- 861 40. Nelson MC, Morrison HG, Benjamino J, Grim SL, Graf J. 2014. Analysis,  
862 optimization and verification of Illumina-generated 16S rRNA gene amplicon  
863 surveys. *PLoS One* 9:e94249.
- 864 41. Renaud G, Stenzel U, Maricic T, Wiebe V, Kelso J. 2015. deML: robust  
865 demultiplexing of Illumina sequences using a likelihood-based approach.  
866 *Bioinformatics* 31:770-2.
- 867 42. D'Amore R, Ijaz UZ, Schirmer M, Kenny JG, Gregory R, Darby AC, Shakya M,  
868 Podar M, Quince C, Hall N. 2016. A comprehensive benchmarking study of  
869 protocols and sequencing platforms for 16S rRNA community profiling. *BMC*  
870 *Genomics* 17:55.
- 871 43. Wright ES, Vetsigian KH. 2016. Quality filtering of Illumina index reads  
872 mitigates sample cross-talk. *BMC Genomics* 17:876.
- 873 44. Fuxjager MJ, Lee JH, Chan TM, Bahn JH, Chew JG, Xiao X, Schlinger BA.  
874 2016. Research Resource: Hormones, Genes, and Athleticism: Effect of  
875 Androgens on the Avian Muscular Transcriptome. *Mol Endocrinol* 30:254-71.
- 876 45. Duffy DL, Bentley GE, Drazen DL, Ball GF. 2000. Effects of testosterone on  
877 cell-mediated and humoral immunity in non-breeding adult European starlings.  
878 *Behavioral Ecology* 11:654-662.
- 879 46. Coordinators NR. 2018. Database resources of the National Center for  
880 Biotechnology Information. *Nucleic Acids Res* 46:D8-D13.
- 881 47. Chen S, Zhou Y, Chen Y, Gu J. 2018. fastp: an ultra-fast all-in-one FASTQ  
882 preprocessor. *Bioinformatics* 34:i884-i890.
- 883 48. Kim D, Paggi JM, Park C, Bennett C, Salzberg SL. 2019. Graph-based genome  
884 alignment and genotyping with HISAT2 and HISAT-genotype. *Nat Biotechnol*  
885 37:907-915.



- 886 49. Li H, Handsaker B, Wysoker A, Fennell T, Ruan J, Homer N, Marth G, Abecasis  
887 G, Durbin R, Genome Project Data Processing S. 2009. The Sequence  
888 Alignment/Map format and SAMtools. *Bioinformatics* 25:2078-9.
- 889 50. Bankevich A, Nurk S, Antipov D, Gurevich AA, Dvorkin M, Kulikov AS, Lesin  
890 VM, Nikolenko SI, Pham S, Prjibelski AD, Pyshkin AV, Sirotkin AV, Vyahhi N,  
891 Tesler G, Alekseyev MA, Pevzner PA. 2012. SPAdes: a new genome assembly  
892 algorithm and its applications to single-cell sequencing. *J Comput Biol*  
893 19:455-77.
- 894 51. Nurk S, Meleshko D, Korobeynikov A, Pevzner PA. 2017. metaSPAdes: a new  
895 versatile metagenomic assembler. *Genome Res* 27:824-834.
- 896 52. Li W, Godzik A. 2006. Cd-hit: a fast program for clustering and comparing large  
897 sets of protein or nucleotide sequences. *Bioinformatics* 22:1658-9.
- 898 53. Fu L, Niu B, Zhu Z, Wu S, Li W. 2012. CD-HIT: accelerated for clustering the  
899 next-generation sequencing data. *Bioinformatics* 28:3150-2.
- 900 54. Shen W, Le S, Li Y, Hu F. 2016. SeqKit: A Cross-Platform and Ultrafast Toolkit  
901 for FASTA/Q File Manipulation. *PLoS One* 11:e0163962.
- 902 55. Camacho C, Coulouris G, Avagyan V, Ma N, Papadopoulos J, Bealer K, Madden  
903 TL. 2009. BLAST+: architecture and applications. *BMC Bioinformatics* 10:421.
- 904 56. Bon M, Orland H. 2011. TT2NE: a novel algorithm to predict RNA secondary  
905 structures with pseudoknots. *Nucleic Acids Res* 39:e93.
- 906 57. Byun Y, Han K. 2009. PseudoViewer3: generating planar drawings of  
907 large-scale RNA structures with pseudoknots. *Bioinformatics* 25:1435-7.
- 908 58. Zuker M. 2003. Mfold web server for nucleic acid folding and hybridization  
909 prediction. *Nucleic Acids Res* 31:3406-15.
- 910 59. Ludwiczak J, Winski A, Szczepaniak K, Alva V, Dunin-Horkawicz S. 2019.  
911 DeepCoil-a fast and accurate prediction of coiled-coil domains in protein  
912 sequences. *Bioinformatics* 35:2790-2795.
- 913 60. Barnett DW, Garrison EK, Quinlan AR, Stromberg MP, Marth GT. 2011.  
914 BamTools: a C++ API and toolkit for analyzing and managing BAM files.  
915 *Bioinformatics* 27:1691-2.
- 916 61. Katoh K, Standley DM. 2013. MAFFT multiple sequence alignment software  
917 version 7: improvements in performance and usability. *Mol Biol Evol*  
918 30:772-80.

- 919 62. Capella-Gutierrez S, Silla-Martinez JM, Gabaldon T. 2009. trimAl: a tool for  
920 automated alignment trimming in large-scale phylogenetic analyses.  
921 *Bioinformatics* 25:1972-3.
- 922 63. Kozlov AM, Darriba D, Flouri T, Morel B, Stamatakis A. 2019. RAxML-NG: a  
923 fast, scalable and user-friendly tool for maximum likelihood phylogenetic  
924 inference. *Bioinformatics* 35:4453-4455.
- 925 64. Darriba D, Taboada GL, Doallo R, Posada D. 2011. ProtTest 3: fast selection of  
926 best-fit models of protein evolution. *Bioinformatics* 27:1164-5.
- 927 65. Lemoine F, Domelevo Entfellner JB, Wilkinson E, Correia D, Davila Felipe M,  
928 De Oliveira T, Gascuel O. 2018. Renewing Felsenstein's phylogenetic bootstrap  
929 in the era of big data. *Nature* 556:452-456.
- 930 66. Kuo MY, Chao M, Taylor J. 1989. Initiation of replication of the human hepatitis  
931 delta virus genome from cloned DNA: role of delta antigen. *J Virol* 63:1945-50.  
932

**Table 1. Summary of novel deltaviruses**

| Virus name                     |       | Host species                                  | Tissue                                             | SRA                                                                | DDBJ      | Contig<br>length (nt) | GC content<br>(%)  | BLASTx best hit       |           |              |
|--------------------------------|-------|-----------------------------------------------|----------------------------------------------------|--------------------------------------------------------------------|-----------|-----------------------|--------------------|-----------------------|-----------|--------------|
|                                |       |                                               |                                                    | accession                                                          | accession |                       |                    | Virus name            | Accession | Identity (%) |
| Taeniopygia guttata DeV        | tgDeV | <i>Taeniopygia guttata</i>                    | Scapulohumeralis caudalis                          | SRR2545946                                                         | BR001665  | 1706                  | 56.6               | Rodent deltavirus     | QJD13558  | 63.3         |
| Marmota monax DeV              | mmDeV | <i>Marmota monax</i>                          | Liver                                              | SRR2136906                                                         | BR001661  | 1712                  | 53.4               | Hepatitis delta virus | AIR77039  | 60.0         |
| Odocoileus virginianus DeV     | ovDeV | <i>Odocoileus virginianus</i>                 | Pedicle                                            | SRR4256033                                                         | BR001662  | 1690                  | 56.4               | Hepatitis delta virus | AHB60712  | 66.7         |
| Erythrura gouldiae DeV         | egDeV | <i>Erythrura gouldiae</i>                     | Skin                                               | SRR7504989                                                         | BR001660  | 596                   | 59.4 <sup>a)</sup> | Rodent deltavirus     | QJD13555  | 63.5         |
| Serinus canaria-associated DeV | scDeV | <i>Serinus canaria</i>                        | Skin                                               | SRR2915371                                                         | BR001664  | 761                   | 54.4 <sup>a)</sup> | Hepatitis delta virus | AIR77012  | 36.0         |
| Pardaliparus venustulus DeV    | pvDeV | <i>Pardaliparus venustulus</i>                | Lung, Kidney, Cardiac muscle, Flight muscle, Liver | SRR7244693<br>SRR7244695<br>SRR7244696<br>SRR7244697<br>SRR7244698 | BR001663  | 1708                  | 55.8               | Rodent deltavirus     | QJD13562  | 62.4         |
| Lonchura striata DeV           | lsDeV | <i>Lonchura striata</i> var. <i>domestica</i> | Blood                                              | -                                                                  | LC575944  | 1708                  | 56.2               | Rodent deltavirus     | QJD13555  | 62.9         |

a) GC content of the partial genome sequences.

**Table 2. Detection of deltavirus-derived reads in RNA-seq data.**

| Virus | BioProject/<br>BioStudy | SRA        | Host                      |                                | RPM <sup>a)</sup><br>(read per million) | Tissue                    |
|-------|-------------------------|------------|---------------------------|--------------------------------|-----------------------------------------|---------------------------|
|       |                         |            | Taxonomy                  |                                |                                         |                           |
|       |                         |            | Family                    | Species                        |                                         |                           |
| tgDeV | PRJNA297576             | SRR2545943 | Estrildidae               | <i>Taeniopygia guttata</i>     | 10.28                                   | Pectoralis                |
|       |                         | SRR2545944 |                           |                                | 1.02                                    | Scapulohumeralis caudalis |
|       |                         | SRR2545946 |                           |                                | 56.73                                   | Scapulohumeralis caudalis |
|       | PRJNA558524             | SRR9899549 | Emberizidae <sup>b)</sup> | <i>Emberiza melanocephala</i>  | 3.11                                    | Blood                     |
|       | PRJNA470787             | SRR7244693 | Paridae                   | <i>Pardaliparus venustulus</i> | 10.68                                   | Lung                      |
|       |                         | SRR7244695 |                           |                                | 2.07                                    | Kidney                    |
|       |                         | SRR7244696 |                           |                                | 2.65                                    | Cardiac muscle            |
|       |                         | SRR7244697 |                           |                                | 7.12                                    | Flight muscle             |
|       |                         | SRR7244698 |                           |                                | 1.77                                    | Liver                     |
|       | PRJNA478907             | SRR7504989 | Estrildidae               | <i>Erythrura gouldiae</i>      | 1.07                                    | Skin                      |
| mmDeV | PRJNA291589             | SRR2136906 |                           | <i>Marmota monax</i>           | 70.86                                   | Liver                     |
|       |                         | SRR2136907 |                           |                                | 63.08                                   | Liver                     |
|       |                         | SRR2136916 |                           |                                | 1.02                                    | Liver                     |
|       | SRP011132               | SRR437934  |                           |                                | 46.34                                   | PBMC                      |
|       |                         | SRR437938  |                           |                                | 19.83                                   | PBMC                      |
| ovDeV | PRJNA317745             | SRR4256033 |                           | <i>Odocoileus virginianus</i>  | 180.73                                  | Pedicle                   |
| scDeV | PRJNA300534             | SRR2915371 |                           | <i>Serinus canaria</i>         | 9.79                                    | Skin                      |

The full version of the table is available as Supplementary Table 3.

a) This table only shows the samples with RPM >1.

b) Emberizidae is regarded as the subfamily Emberizinae of the family Fringillidae in TimeTree.

**Table 3. Coexisting viruses in deltavirus-positive SRAs**

| SRA accession | Host                       |                | Virus name                        | Envelope | Deltavirus infection |
|---------------|----------------------------|----------------|-----------------------------------|----------|----------------------|
|               | Species                    | Common name    |                                   |          |                      |
| SRR2545944    | <i>Taeniopygia guttata</i> | Zebra finch    | Serinus canaria polyomavirus      | -        | tgDeV                |
| SRR5001849    | <i>Taeniopygia guttata</i> | Zebra finch    | Serinus canaria polyomavirus      | -        | tgDeV                |
| SRR5001850    | <i>Taeniopygia guttata</i> | Zebra finch    | Serinus canaria polyomavirus      | -        | tgDeV                |
| SRR5001851    | <i>Taeniopygia guttata</i> | Zebra finch    | Serinus canaria polyomavirus      | -        | tgDeV                |
| SRR2915371    | <i>Serinus canaria</i>     | Common canary  | Canary bornavirus 3               | +        | scDeV                |
|               |                            |                | Canary circovirus                 | -        |                      |
| SRR7504989    | <i>Erythrura gouldiae</i>  | Gouldian finch | Erythrura gouldiae polyomavirus 1 | -        | egDeV                |

**a**

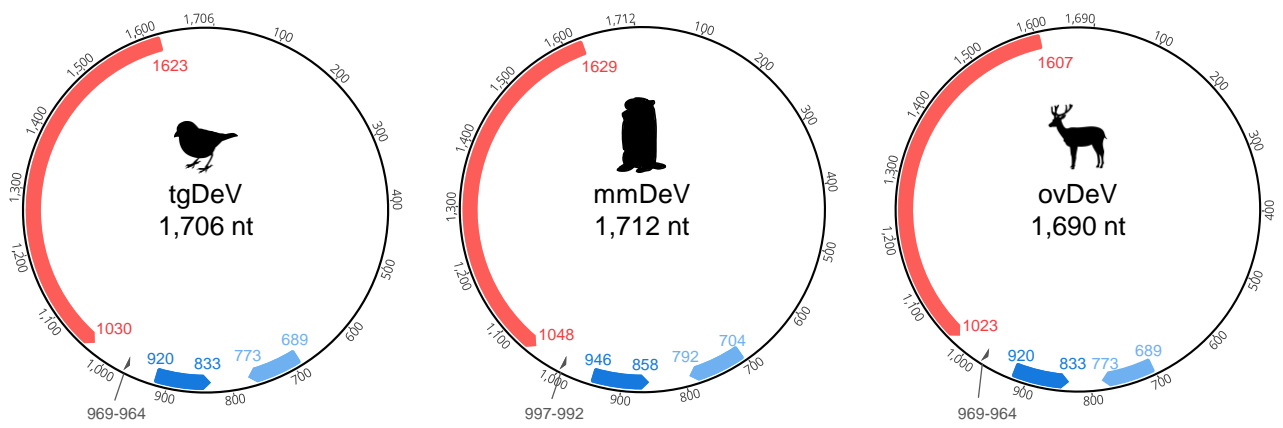

**b**

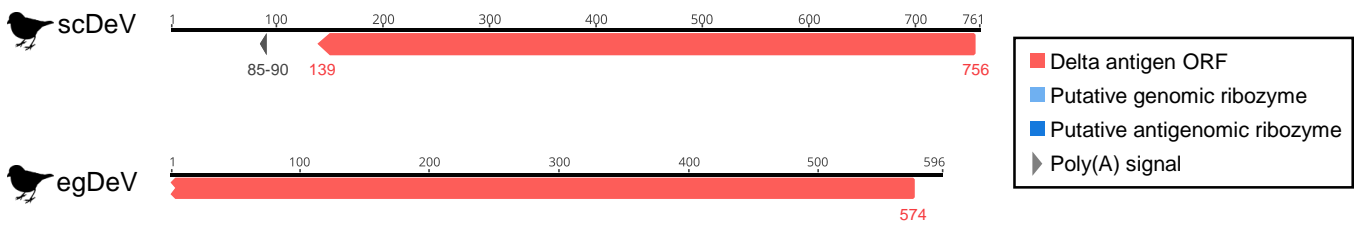

**c**

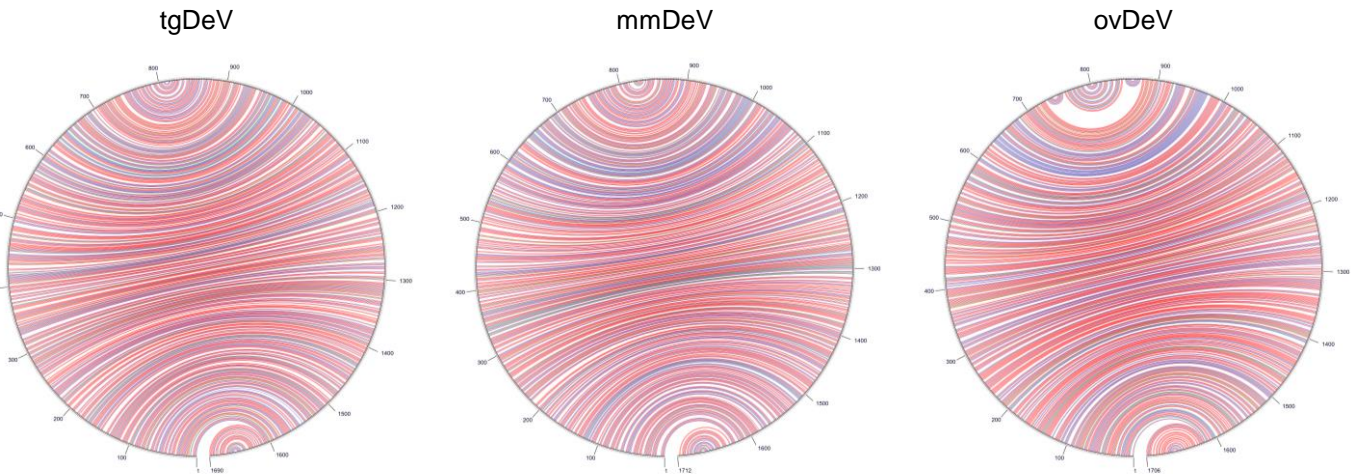

# Fig. 2

**a**

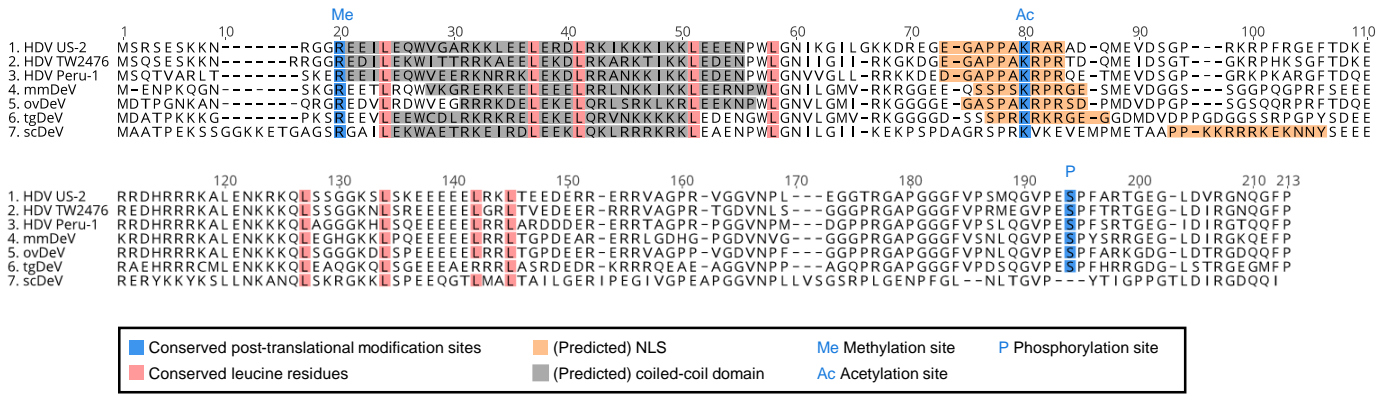

**b**

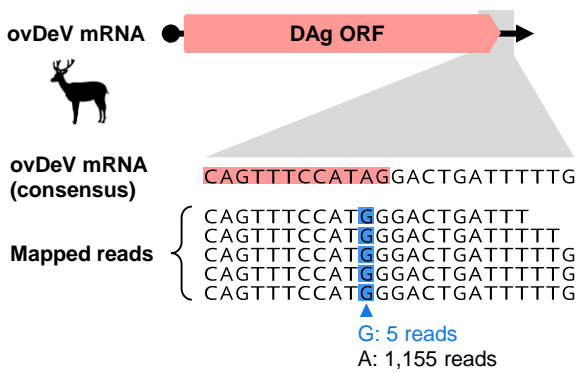

**c**

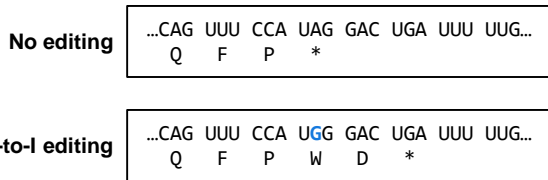

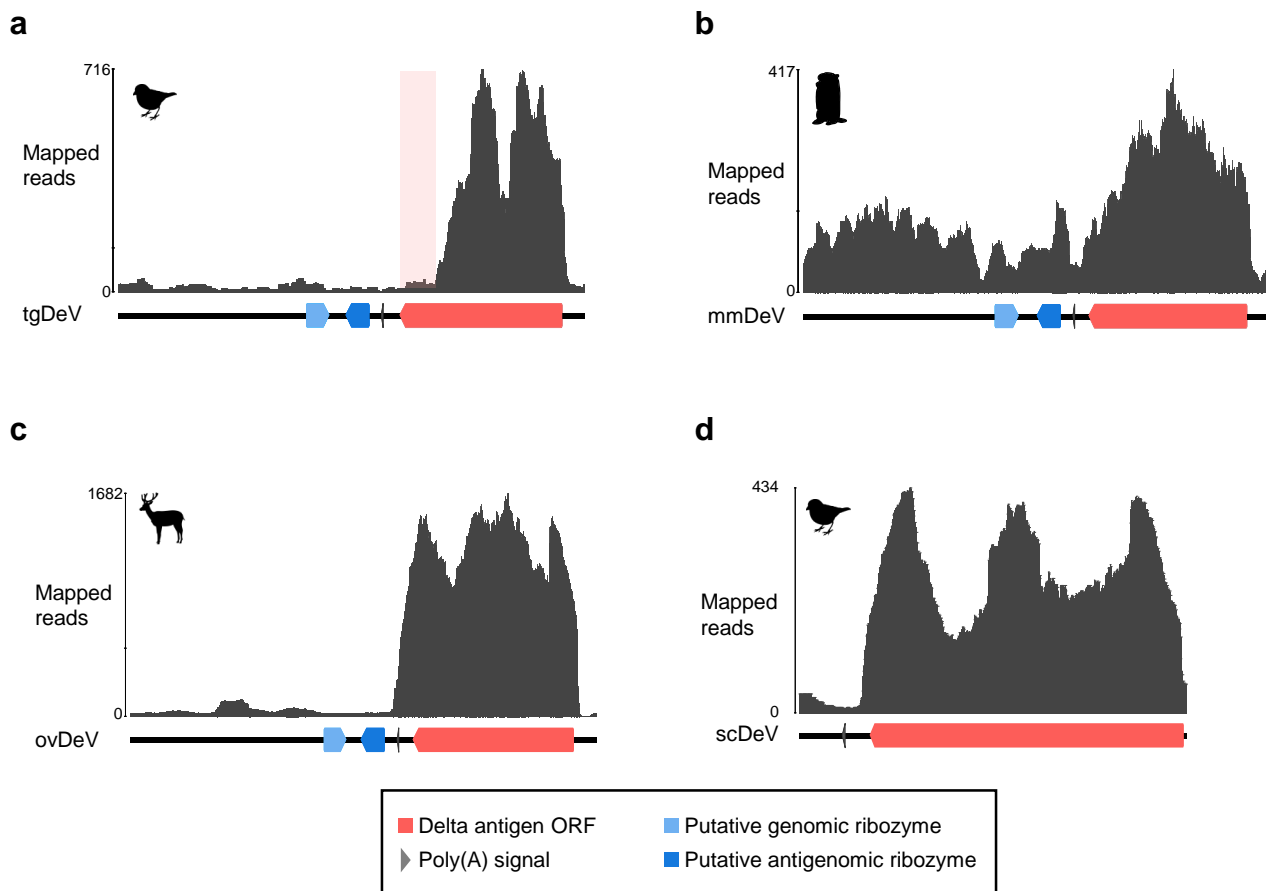



**a**

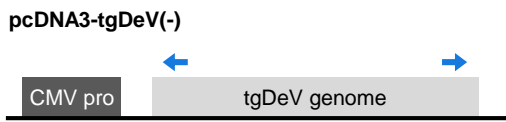

**b**

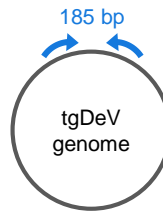

**c**

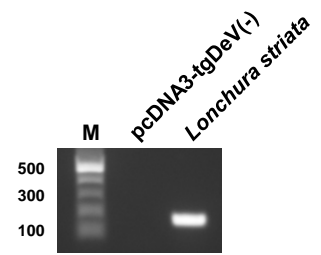

**d**

|       | Nucleotide identity (%) |       |       |
|-------|-------------------------|-------|-------|
|       | pvDeV                   | tgDeV | IsDeV |
| pvDeV |                         | 98.2  | 98.4  |
| tgDeV | 98.2                    |       | 98.2  |
| IsDeV | 98.4                    | 98.2  |       |

**e**

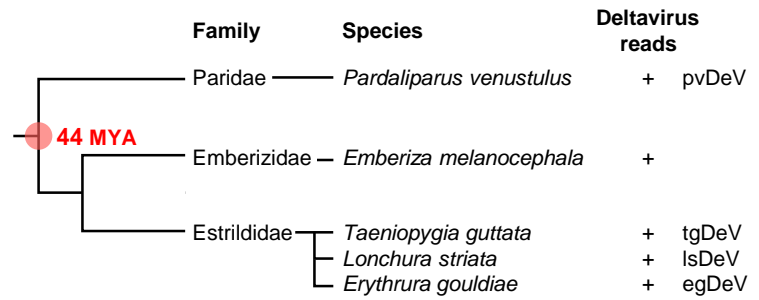

**a**

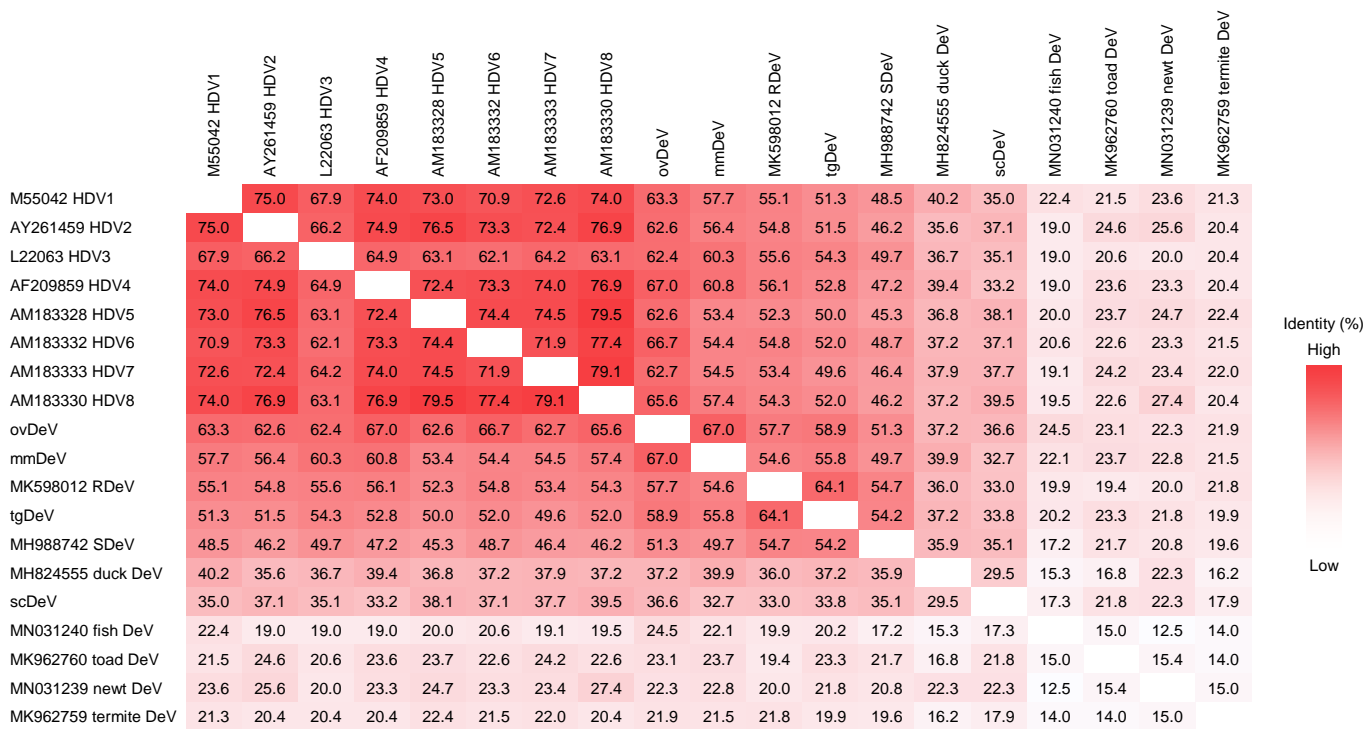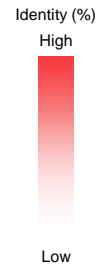

**b**

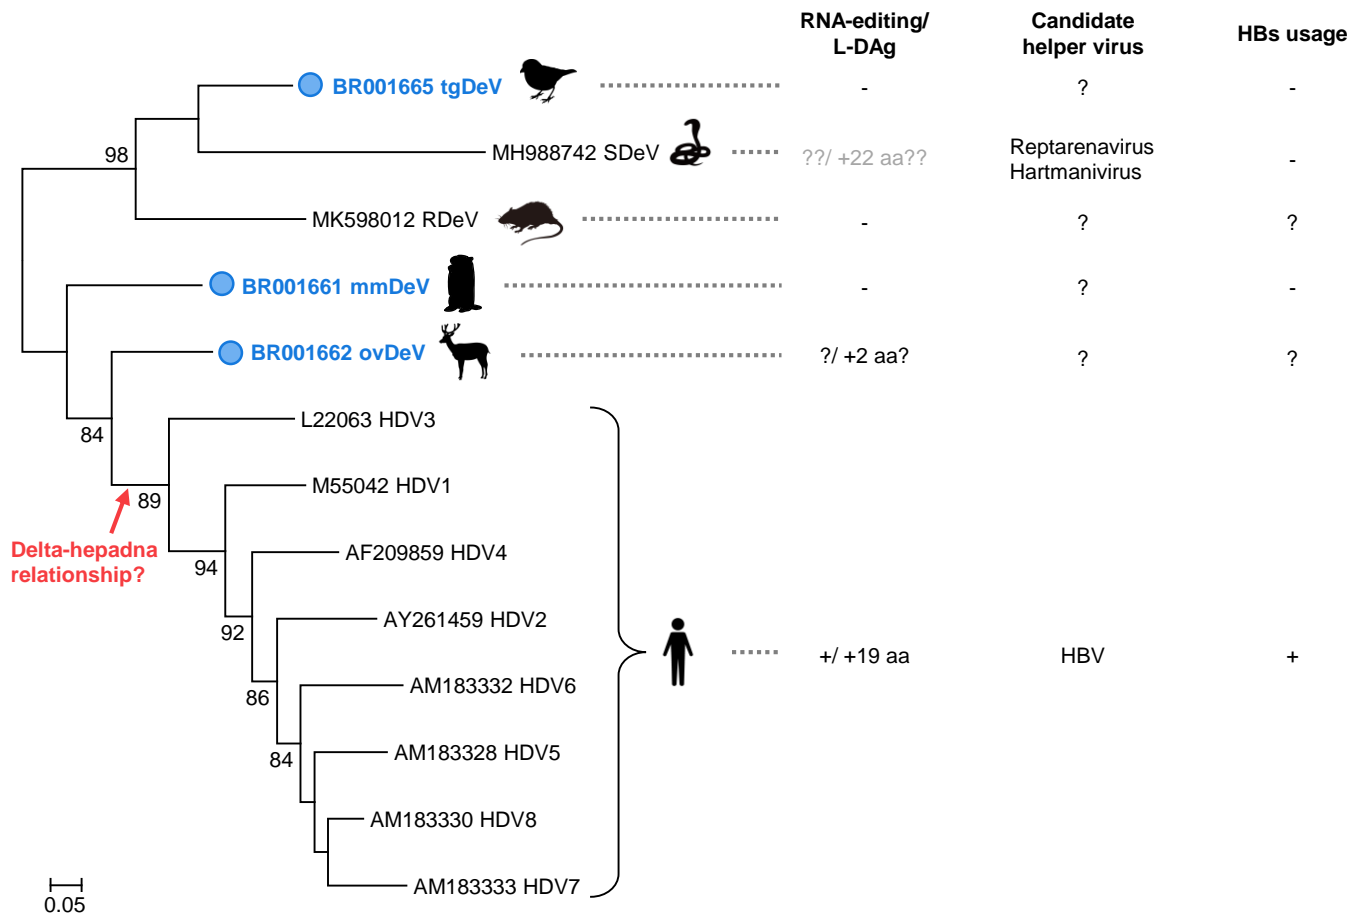

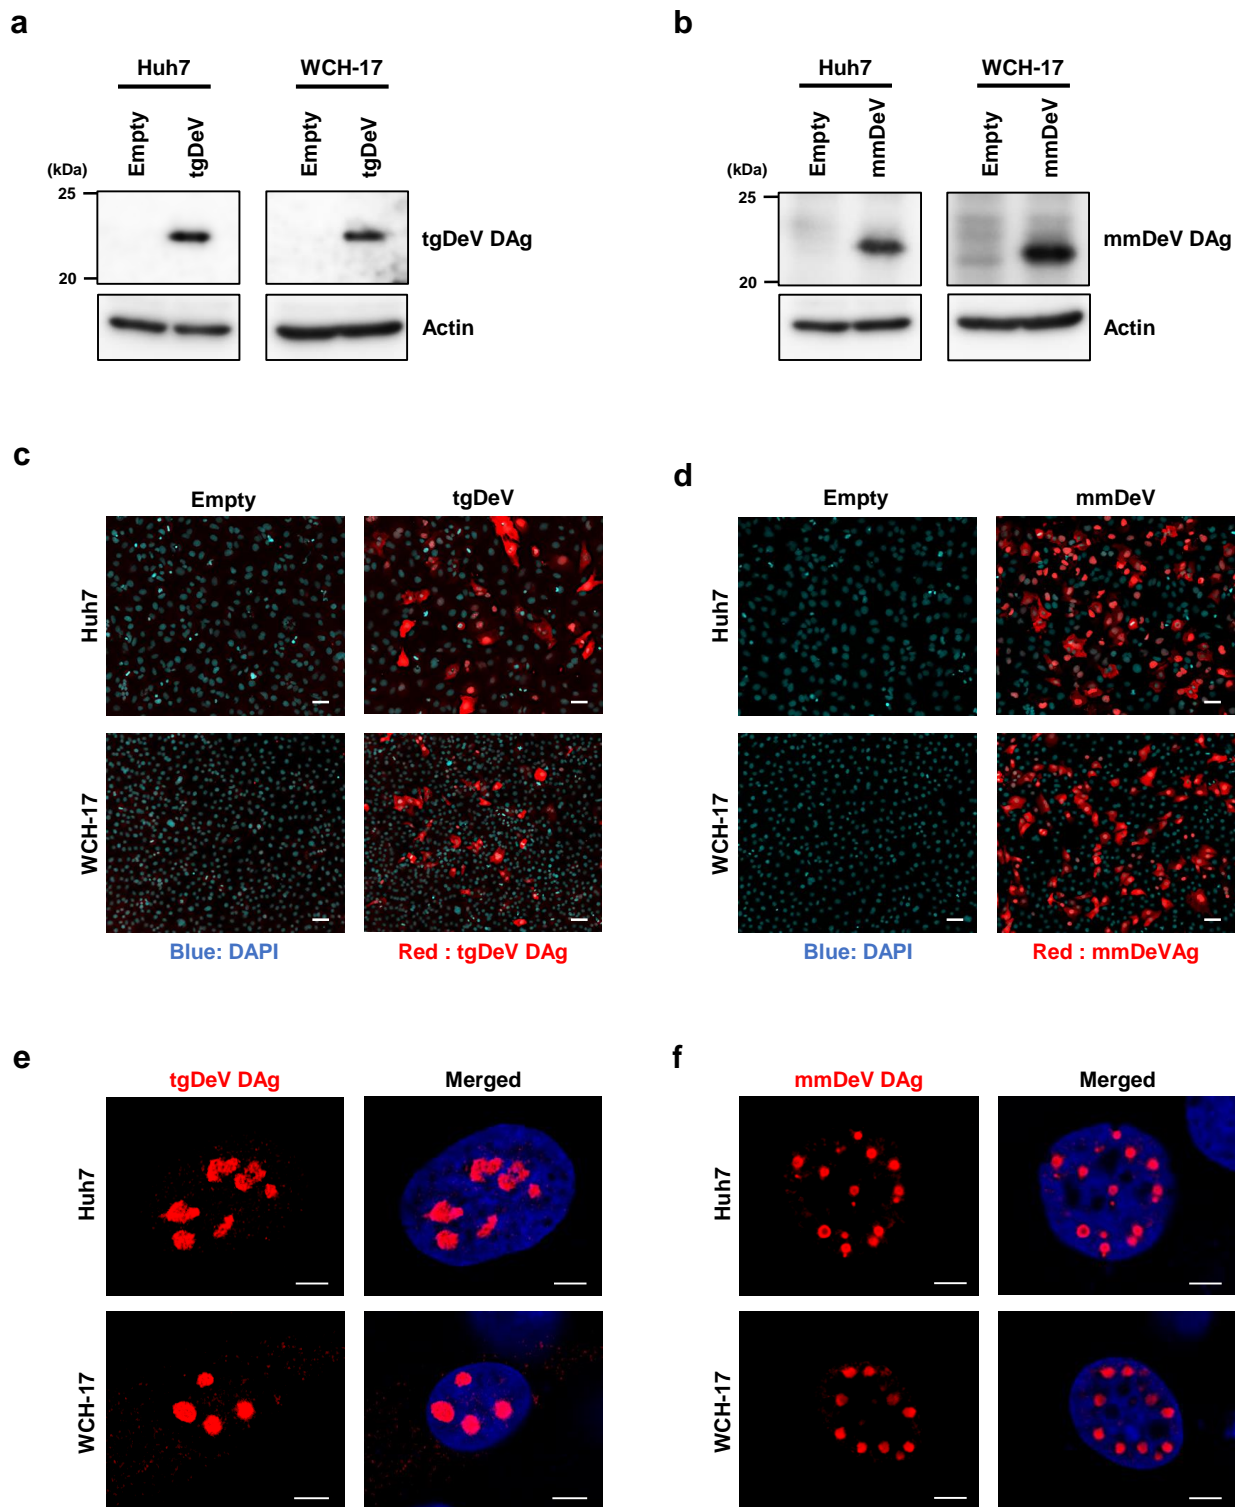

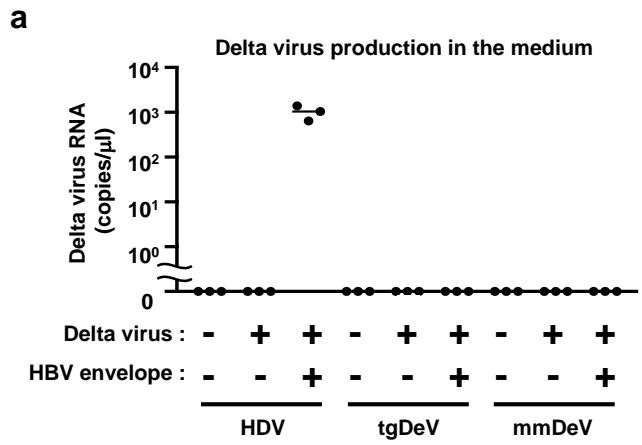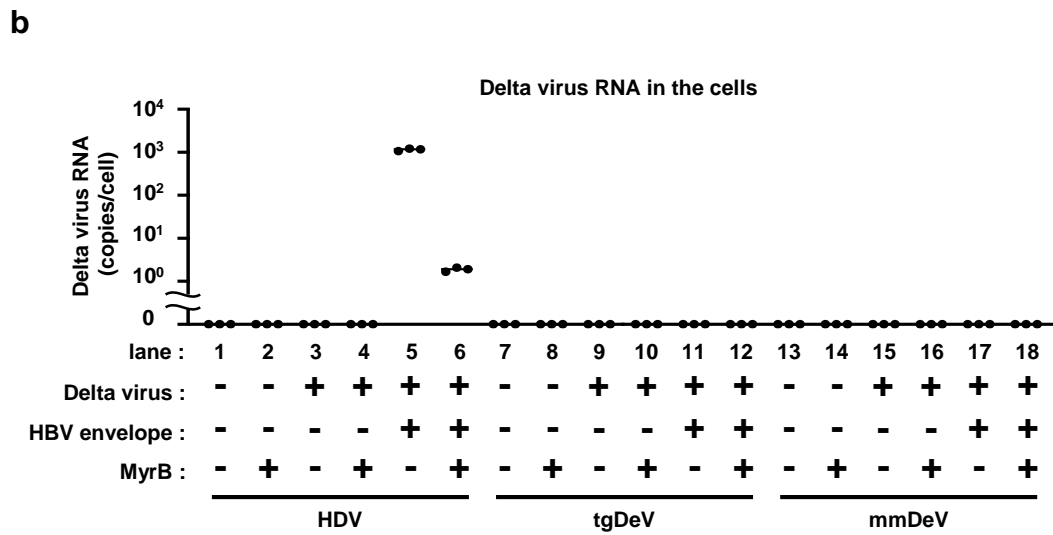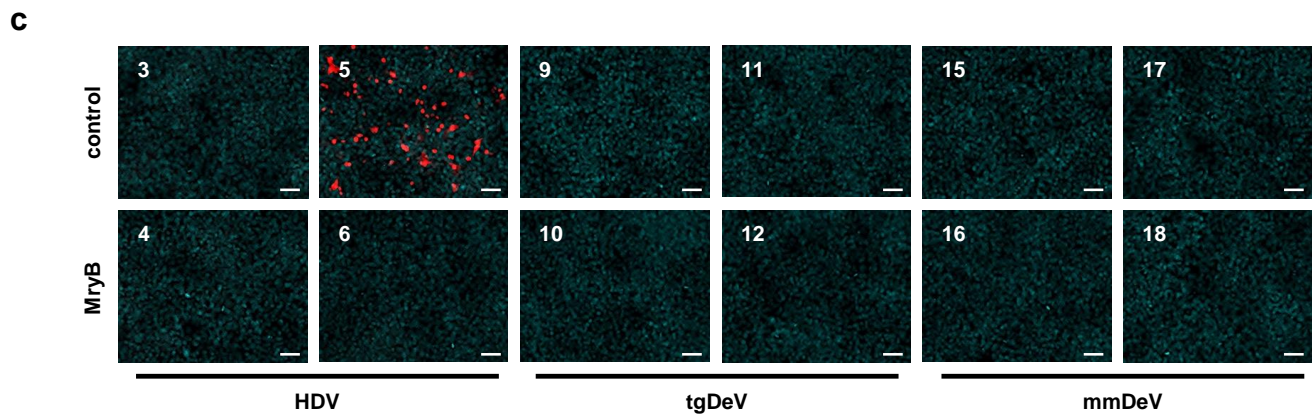

Blue: nucleus Red: DAg
